# Supplementary material for: Computational insights into different regioselectivities in the Ir-porphyrin-catalyzed C–H insertion reaction of quinoid carbene
Source: Royal Society of Chemistry journal article supplement (doi:10.1039/d1qo01727f), 2022-01-01
Supplement: d1qo01727f1.pdf [file d1qo01727f1.pdf]

## Supporting Information

# Computational Insights into Different Regioselectivities in Ir-Porphyrin-Catalyzed C–H Insertion Reaction of Quinoid Carbene

Xiahe Chen, Chaoqin Cao, Yun-Fang Yang\* and Yuan-Bin She\*

College of Chemical Engineering, Zhejiang University of Technology, Hangzhou, Zhejiang  
310014, China

\*E-mail: sheyb@zjut.edu.cn

\*E-mail: yangyf@zjut.edu.cn

## Table of Contents

|                                                                                                                                                              |    |
|--------------------------------------------------------------------------------------------------------------------------------------------------------------|----|
| Proposed catalytic cycle for Ir-porphyrin-catalyzed C–H insertion reaction .....                                                                             | 2  |
| Gibbs free energy profiles for HAA-O and HAA-C catalytic cycles of insertion reaction of <b>Ir-QC</b> to 1-methyl-1,3-cyclohexadiene <b>1</b> (M06) .....    | 2  |
| Gibbs free energy profiles for HAA-O and HAA-C catalytic cycles of insertion reaction of <b>Ir-QC</b> to 1-methylcyclohexene <b>4</b> (M06).....             | 4  |
| Gibbs free energy profiles for HAA-O and HAA-C catalytic cycles of insertion reaction of <b>Ir-QC</b> to 1-methyl-1,3-cyclohexadiene <b>1</b> (MN15) .....   | 6  |
| Gibbs free energy profiles for HAA-O and HAA-C catalytic cycle of insertion reaction of <b>Ir-QC</b> to 1-methylcyclohexene <b>4</b> (MN15).....             | 8  |
| Rebound transition states .....                                                                                                                              | 10 |
| Gibbs free energy profiles for HAA-O and HAA-C catalytic cycle of insertion reaction of <b>Ir-QC</b> to 1-methyl-1,3-cyclohexadiene <b>1</b> (B3LYP-D3)..... | 10 |
| Different conformers for the hydrogen-atom abstraction by quinoid oxygen of the <sup>OSS</sup> <b>Ir-QC</b> (with substrate <b>1</b> ).....                  | 11 |
| Different conformers for the hydrogen-atom abstraction by carbene carbon of the <sup>OSS</sup> <b>Ir-QC</b> (with substrate <b>1</b> ).....                  | 11 |
| Localized molecular orbitals (LMOs) analysis .....                                                                                                           | 12 |
| Energies and free energies of calculated structures .....                                                                                                    | 12 |
| Cartesian coordinates of the structures .....                                                                                                                | 14 |

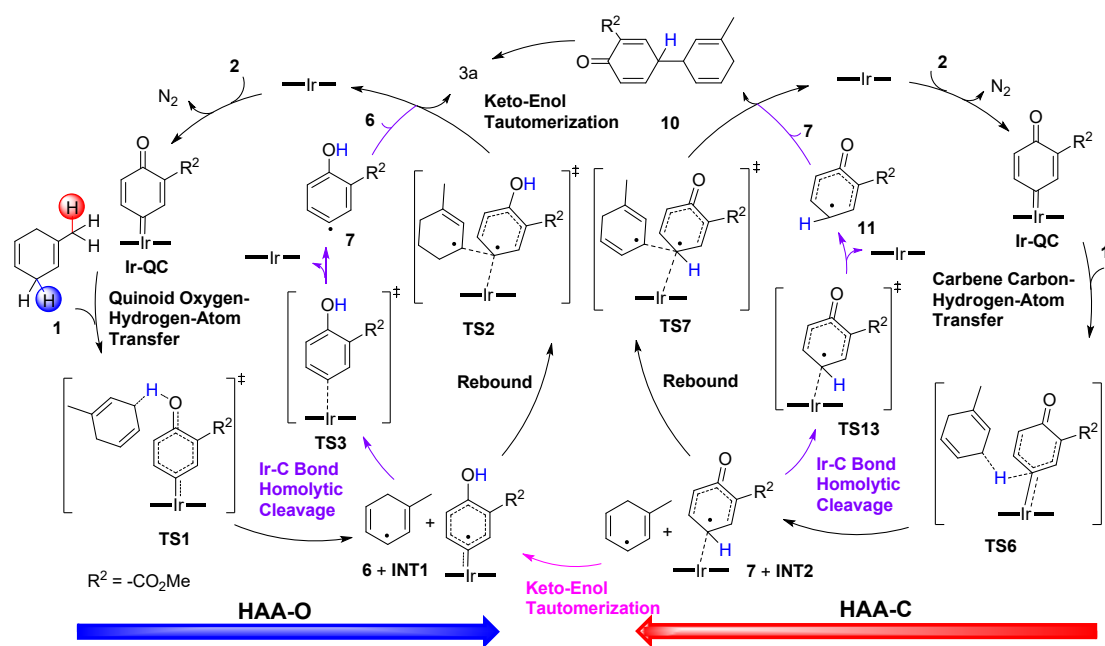

**Scheme S1.** Proposed catalytic cycle for Ir-porphyrin-catalyzed C–H insertion reaction of QC.

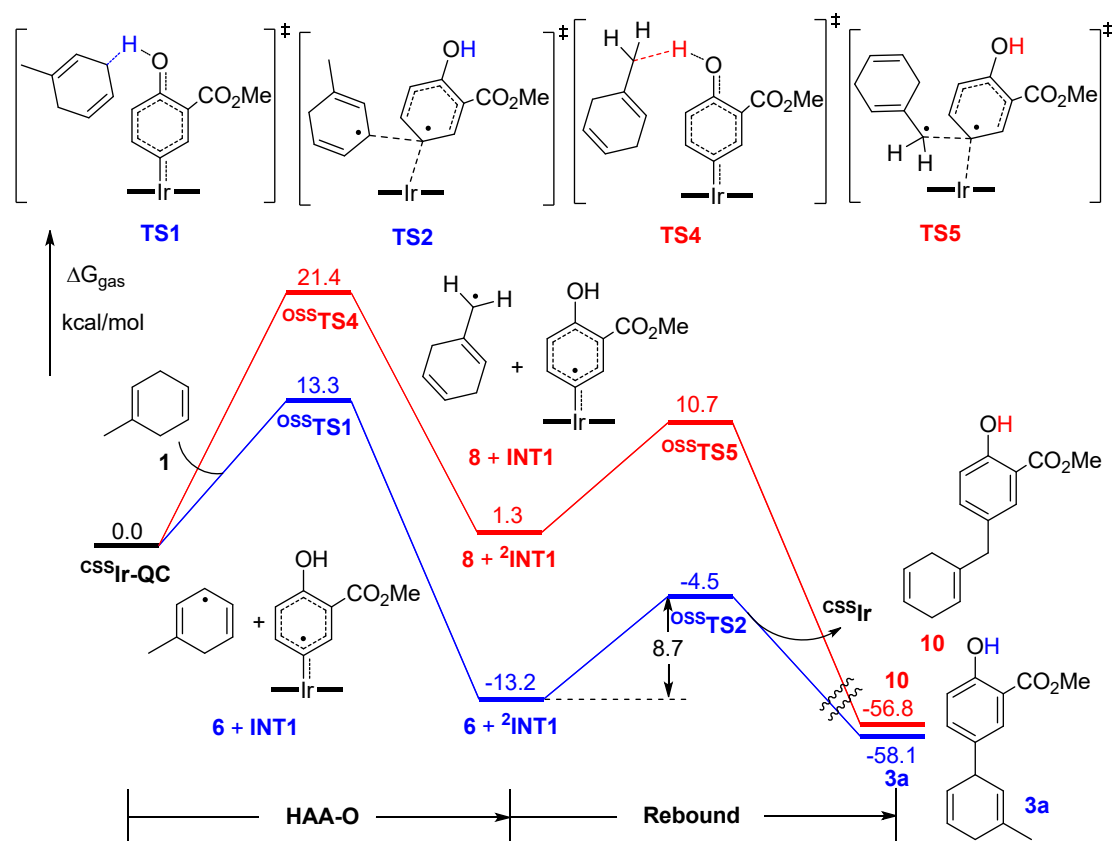

**Figure S1.** Gibbs free energy profiles for HAA-O catalytic cycle of insertion reaction of  $\text{CSSIr-QC}$  to **1**. CSS is closed-shell singlet and OSS is open-shell singlet. Gibbs free energy obtained at the (U)M06/6-311+G(d,p)-SDD/(U)M06/6-31G(d)-LANL2DZ level.

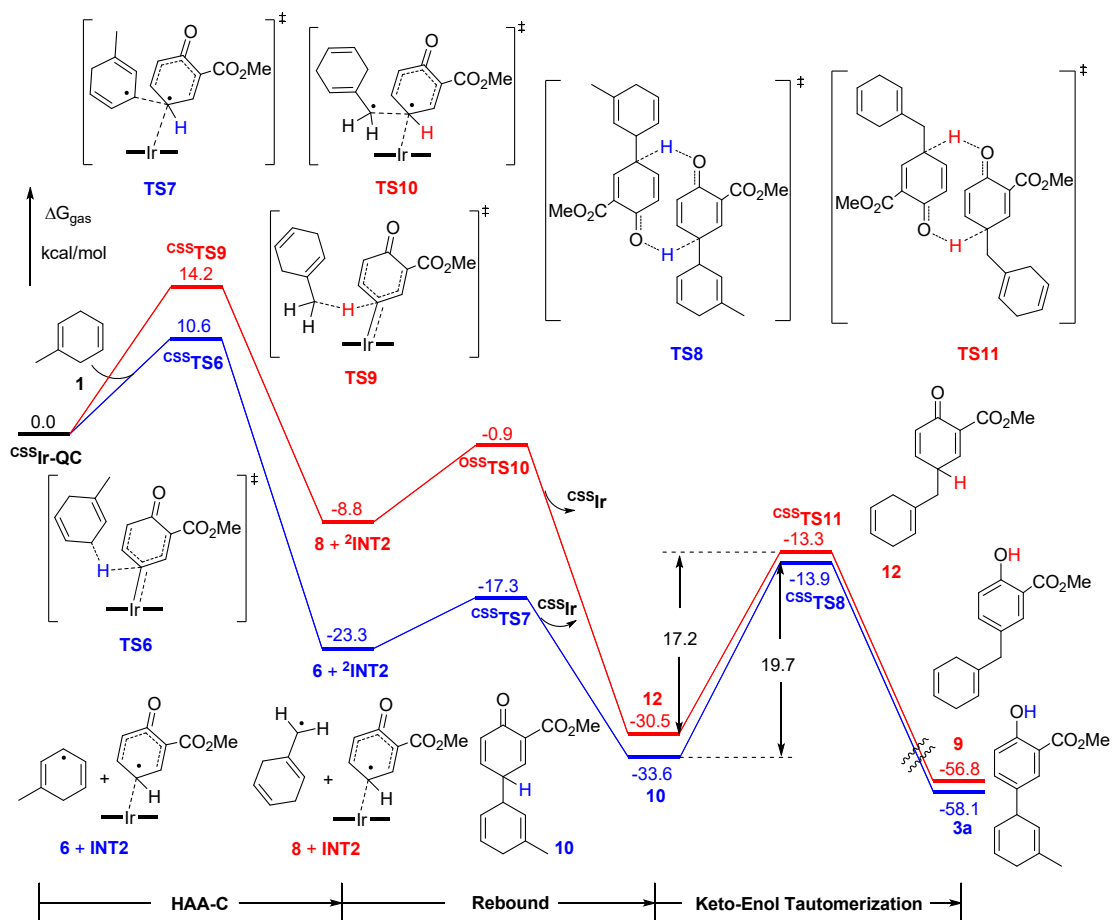

**Figure S2.** Gibbs free energy profiles for HAA-C catalytic cycle of insertion reaction of  $\text{CSSIr-QC}$  to **1**. The free energy of  $\text{CSSTS8}$  is given with respect to **10**, and  $\text{CSSTS11}$  is given with respect to **12**. Gibbs free energy obtained at the (U)M06/6-311+G(d,p)-SDD/(U)M06/6-31G(d)-LANL2DZ level.

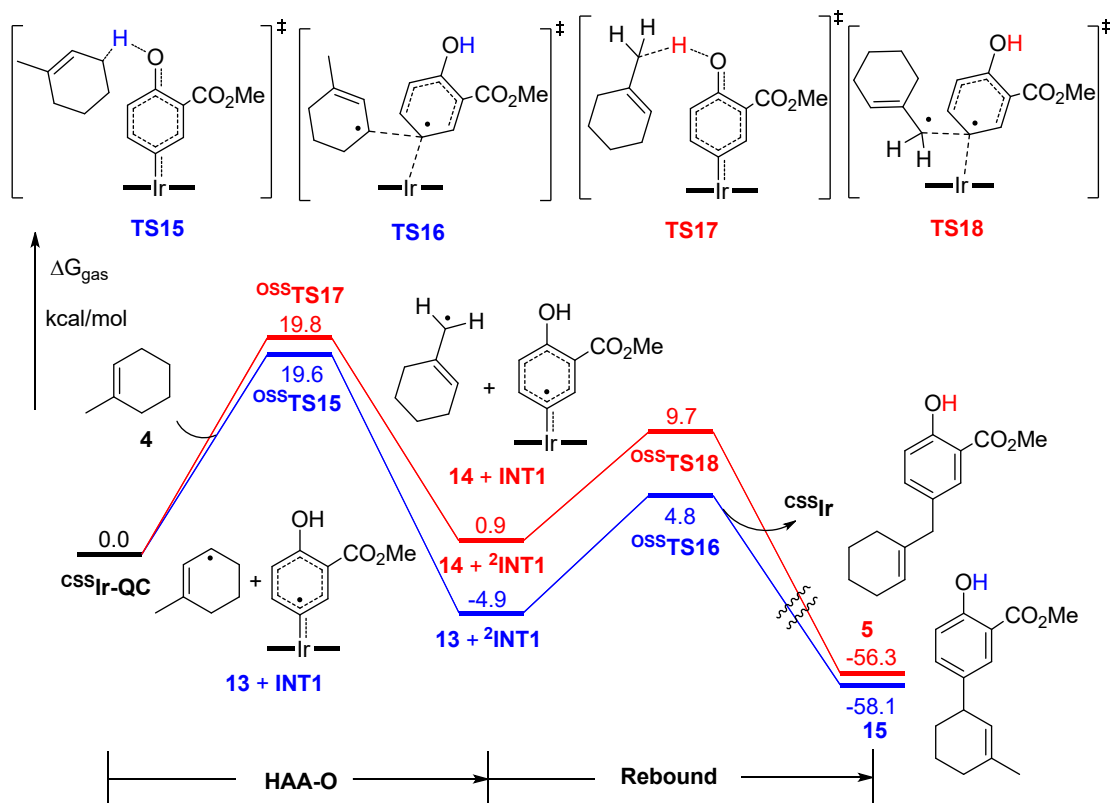

**Figure S3.** Gibbs free energy profiles for HAA-O catalytic cycle of insertion reaction of  $^{CSS}Ir-QC$  to **4**. Gibbs free energy obtained at the (U)M06/6-311+G(d,p)-SDD// (U)M06/6-31G(d)-LANL2DZ level.

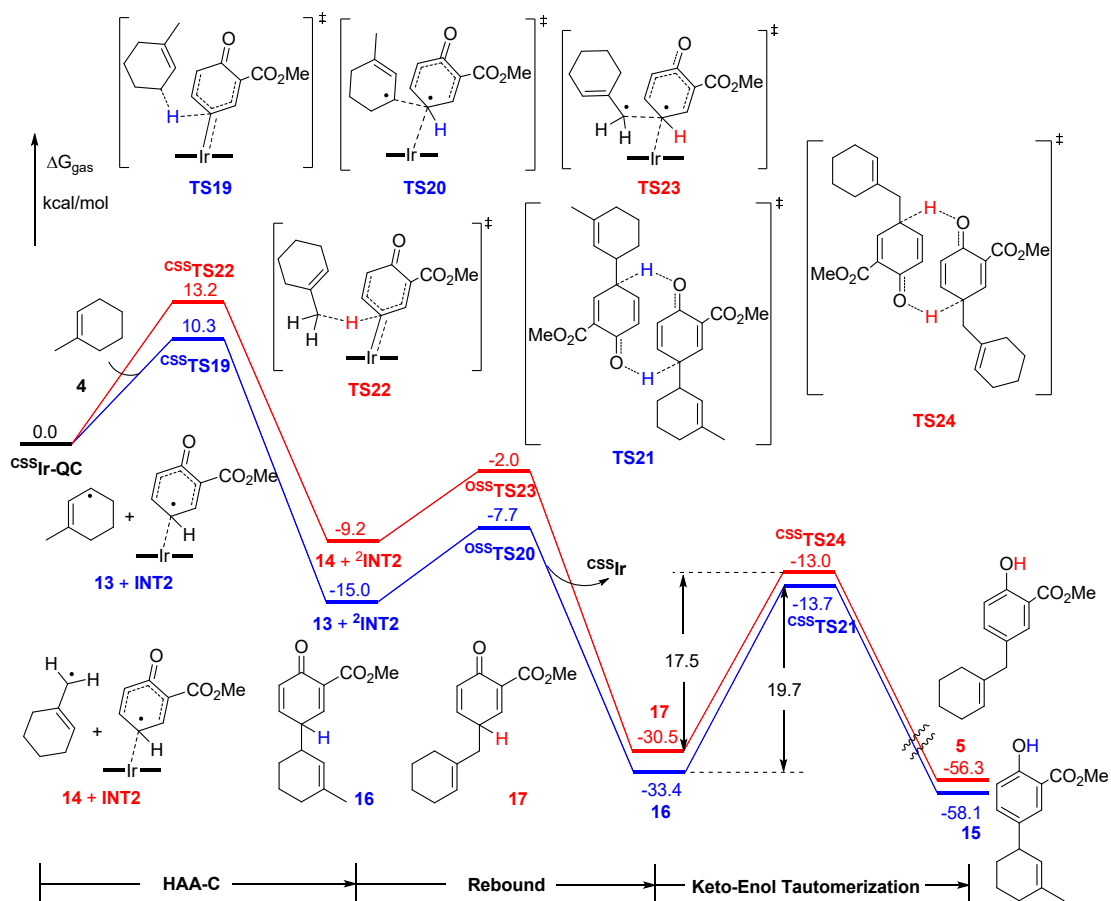

**Figure S4.** Gibbs free energy profiles for HAA-C catalytic cycle of insertion reaction of  $\text{CSSIr-QC}$  to **4**. The free energy of  $\text{CSS}^{\ddagger}\text{TS21}$  is given with respect to **16** and  $\text{CSS}^{\ddagger}\text{TS24}$  is given with respect to **17**. Gibbs free energy obtained at the (U)M06/6-311+G(d,p)-SDD/(U)M06/6-31G(d)-LANL2DZ level.  $\text{OSS}^{\ddagger}\text{TS23}$  were subjected to a loose convergence threshold.

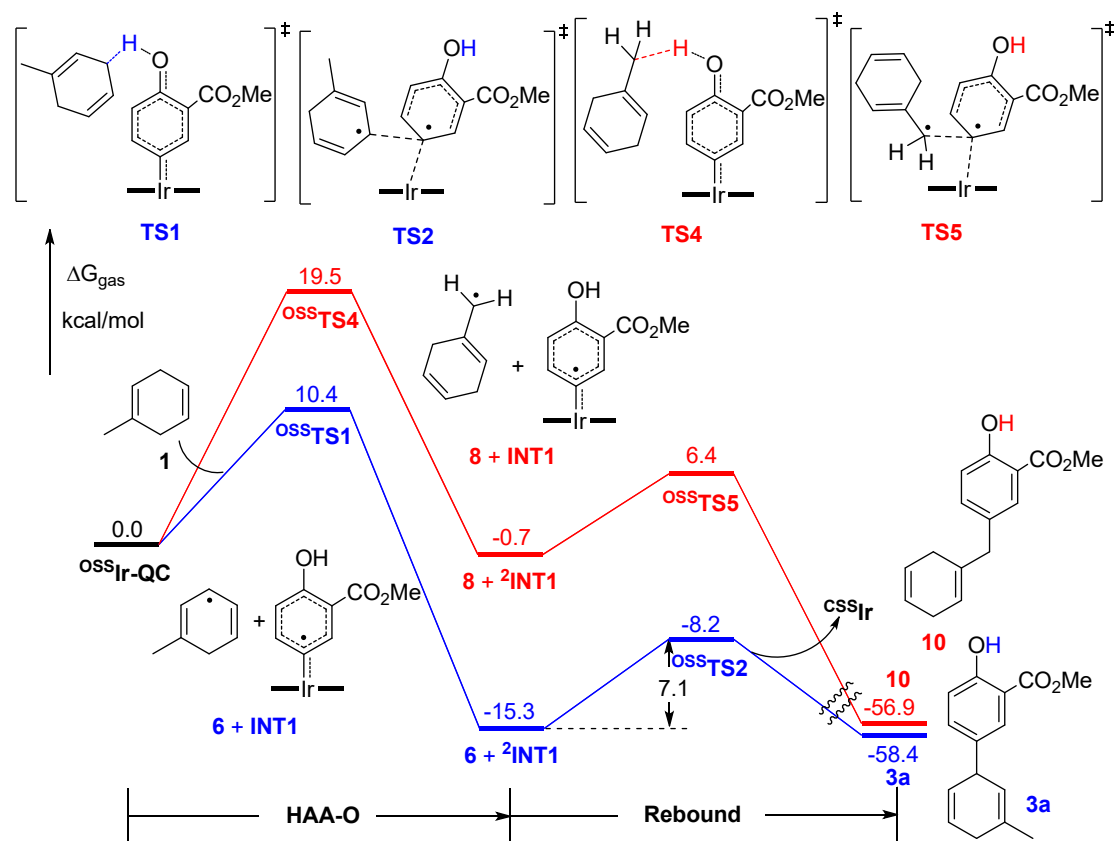

**Figure S5.** Gibbs free energy profiles for HAA-O catalytic cycle of insertion reaction of  $^{OSS}Ir\text{-}QC$  to **1**. CSS is closed-shell singlet and OSS is open-shell singlet. Gibbs free energy obtained at the (U)MN15/6-311+G(d,p)-SDD//((U)MN15/6-31G(d)-LANL2DZ level.

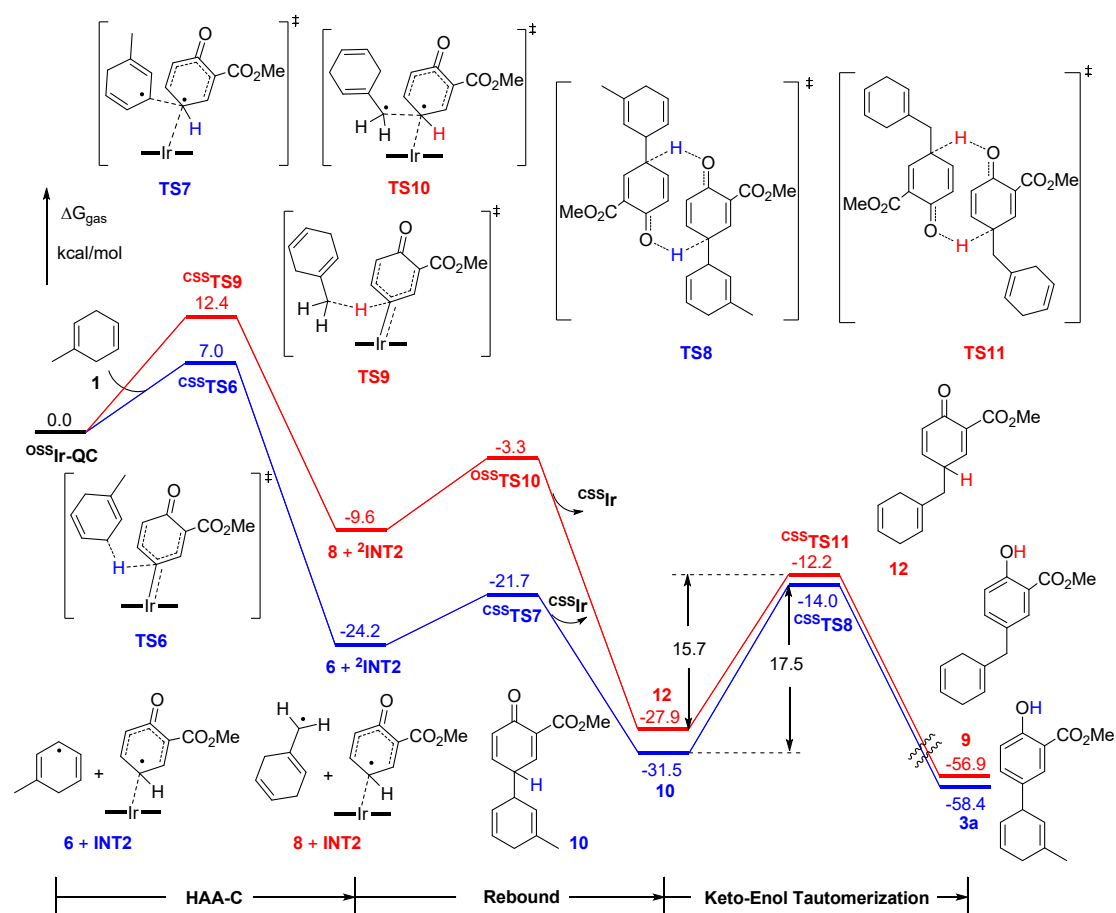

**Figure S6.** Gibbs free energy profiles for HAA-C catalytic cycle of insertion reaction of  ${}^{\text{OSS}}\text{Ir-QC}$  to **1**. The free energy of  ${}^{\text{CSS}}\text{TS8}$  is given with respect to **10**, and  ${}^{\text{CSS}}\text{TS11}$  is given with respect to **12**. Gibbs free energy obtained at the (U)MN15/6-311+G(d,p)-SDD//((U)MN15/6-31G(d)-LANL2DZ level.

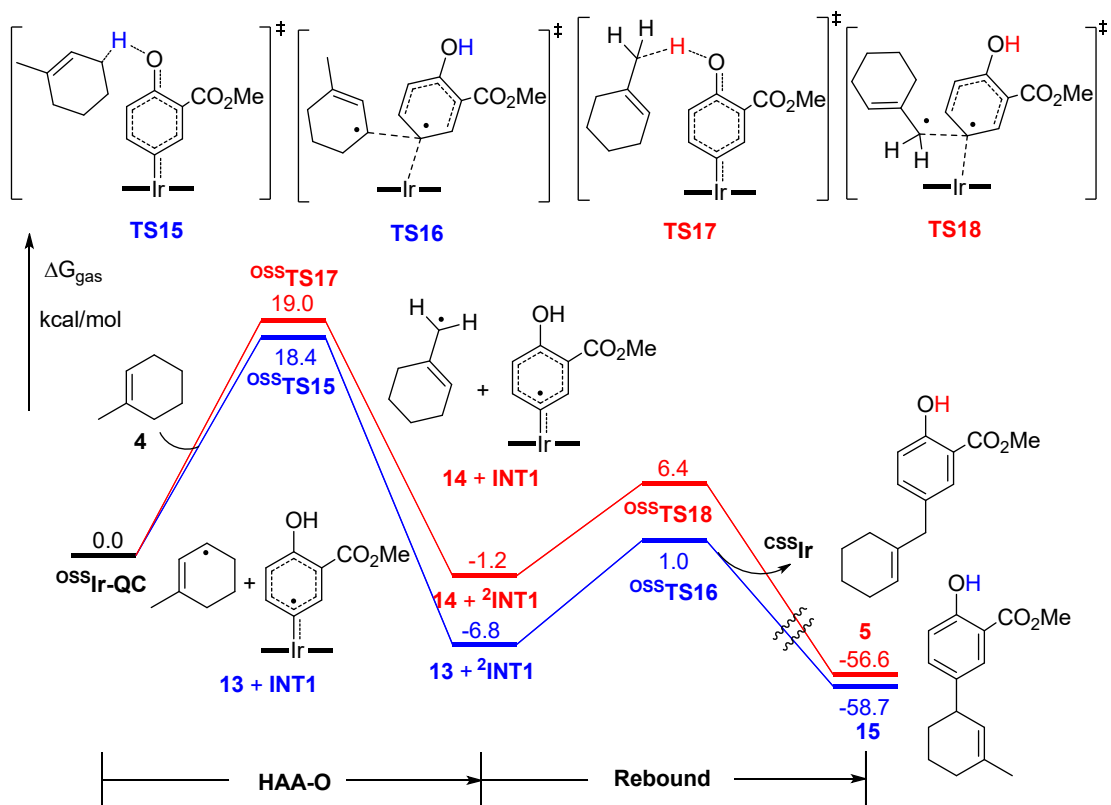

**Figure S7.** Gibbs free energy profiles for HAA-O catalytic cycle of insertion reaction of  $\text{OSSIr-QC}$  to **4**. Gibbs free energy obtained at the (U)MN15/6-311+G(d,p)-SDD/(U)MN15/6-31G(d)-LANL2DZ level.



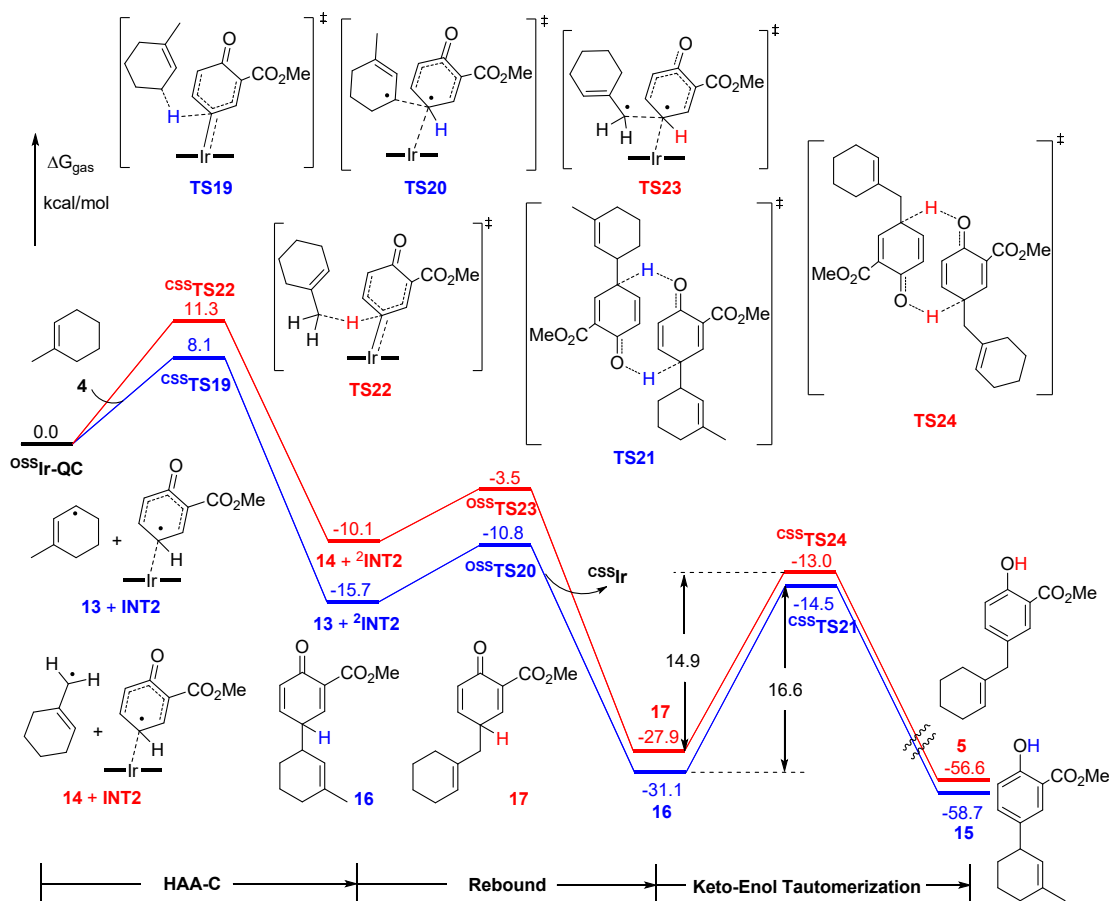

**Figure S8.** Gibbs free energy profiles for HAA-C catalytic cycle of insertion reaction of  $\text{OSSIr-QC}$  to **4**. The free energy of  $\text{CSS}^{\dagger}\text{TS21}$  is given with respect to **16** and  $\text{CSS}^{\dagger}\text{TS24}$  is given with respect to **17**. Gibbs free energy obtained at the (U)MN15/6-311+G(d,p)-SDD//((U)MN15/6-31G(d)-LANL2DZ level.

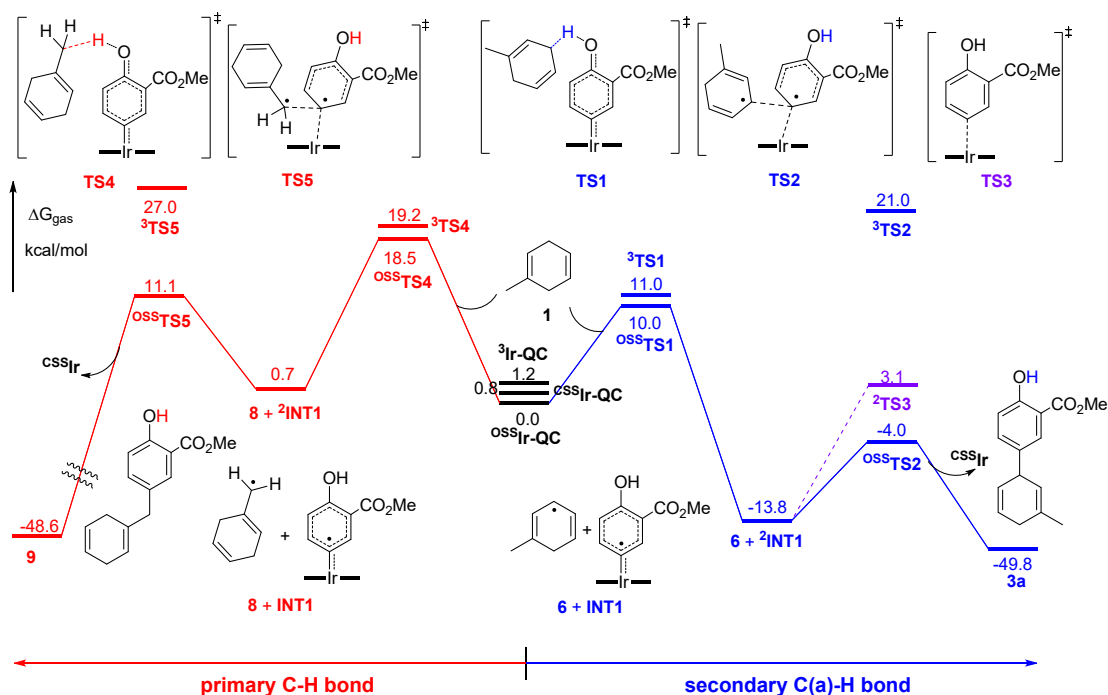

**Figure S9.** Gibbs free energy profiles for HAA-O catalytic cycle of insertion reaction of  $^{OSS}Ir$ -QC to **1**. Gibbs free energy obtained at the (U)B3LYP-D3/6-311+G(d,p)-SDD// (U)B3LYP-D3/6-31G(d)-LANL2DZ level.

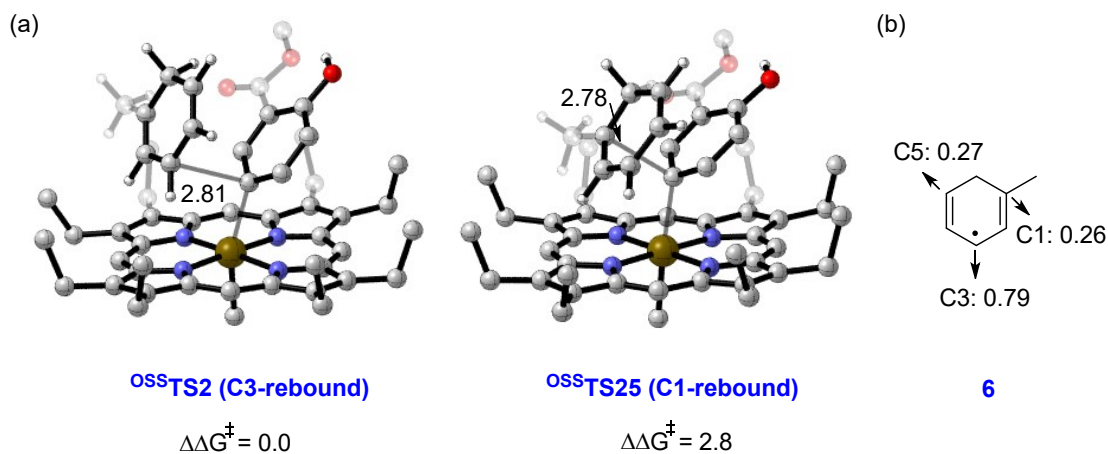

**Figure S10.** (a) Optimized geometries of transition states  $^{OSS}TS2$  and  $^{OSS}TS25$ . (b) Populations of spin densities for radical intermediate **6**. Hydrogen atoms on the catalyst are omitted for clarity. The distances are in Å, and energies are shown in kcal mol<sup>-1</sup>.

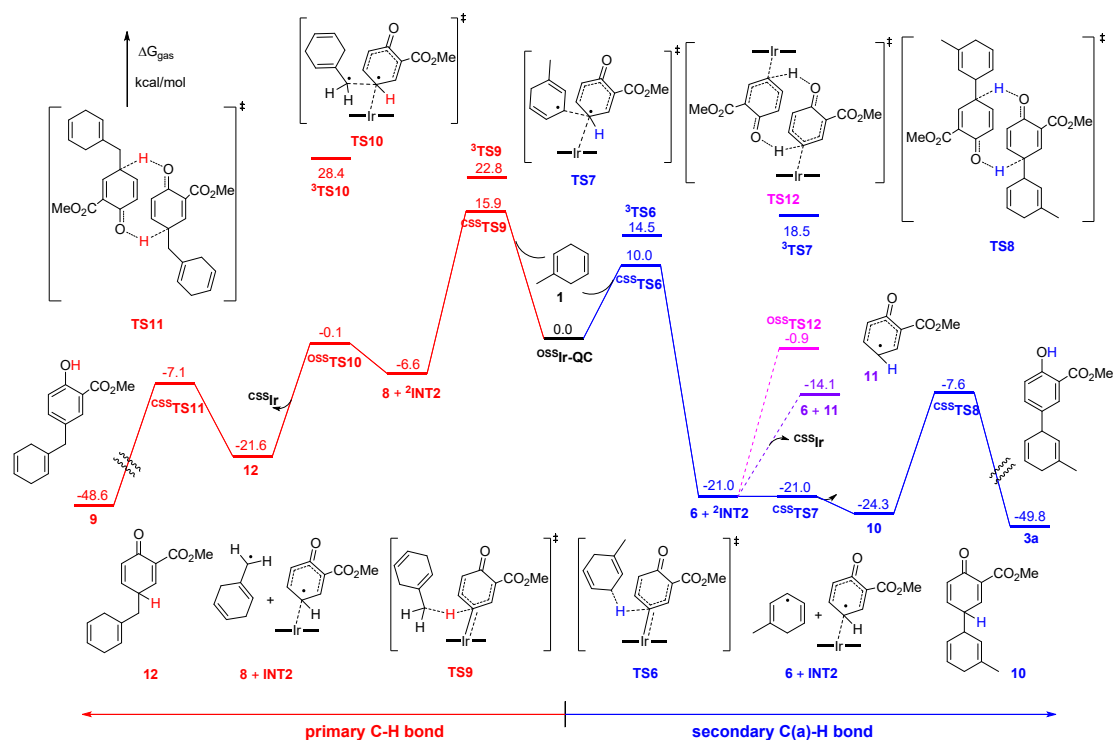

**Figure S11.** Gibbs free energy profiles for HAA-C catalytic cycle of insertion reaction of  $^{OSS}Ir\text{-}QC$  to **1**. The free energy of  $^{CSS}TS8$  is given with respect to **10**, and  $^{CSS}TS11$  is given with respect to **12**. Gibbs free energy obtained at the (U)B3LYP-D3/6-311+G(d,p)-SDD//((U)B3LYP-D3/6-31G(d)-LANL2DZ level.

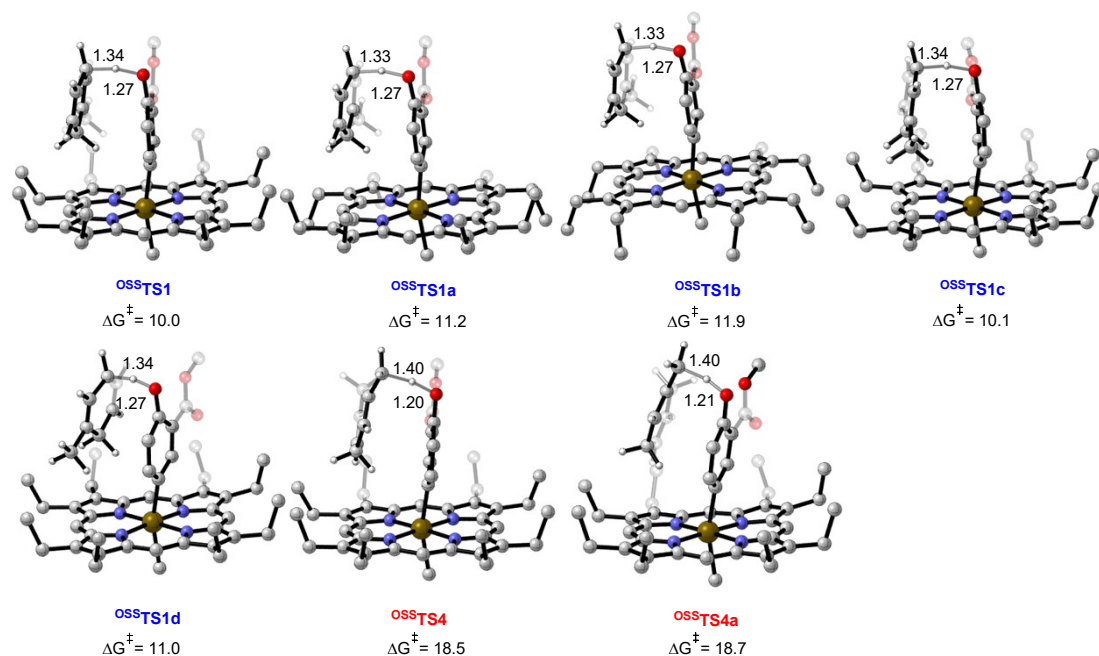

**Figure S12.** Different conformers for the hydrogen-atom abstraction by quinoid oxygen of the  $^{OSS}Ir\text{-}QC$  (with substrate **1**). The distances are shown in Å. The energies are shown in kcal mol<sup>-1</sup>. Gibbs free energy obtained at the (U)B3LYP-D3/6-311+G(d,p)-SDD//((U)B3LYP-D3/6-31G(d)-LANL2DZ level.

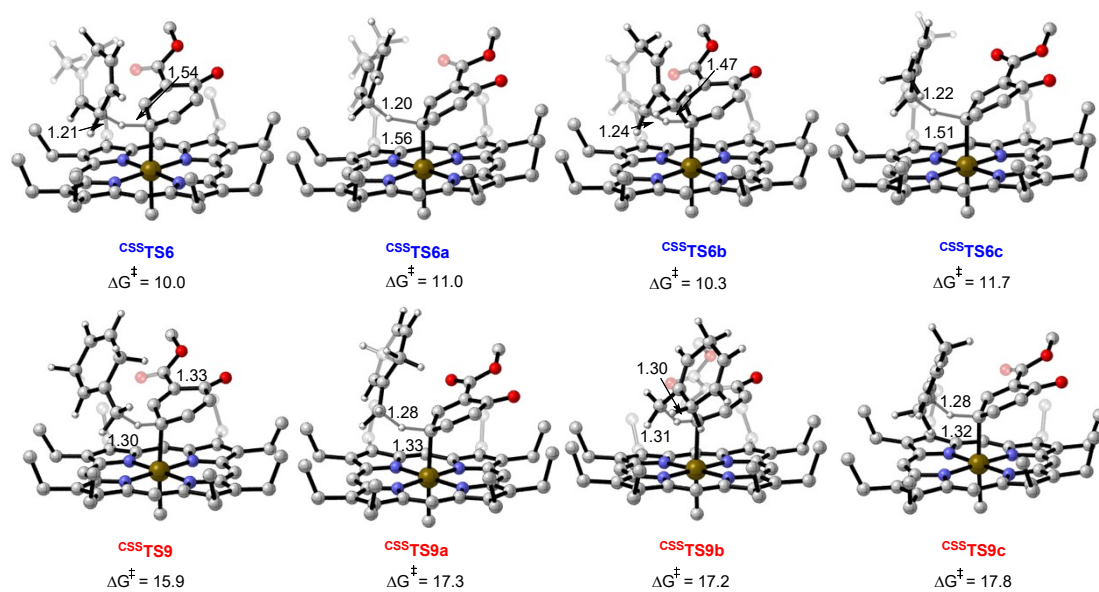

**Figure S13.** Different conformers for the hydrogen-atom abstraction by carbene carbon of the <sup>o</sup>SSIr-QC (with substrate **1**). The distances are shown in Å. The energies are shown in kcal mol<sup>-1</sup>. Gibbs free energy obtained at the (U)B3LYP-D3/6-311+G(d,p)-SDD//((U)B3LYP-D3/6-31G(d)-LANL2DZ level.

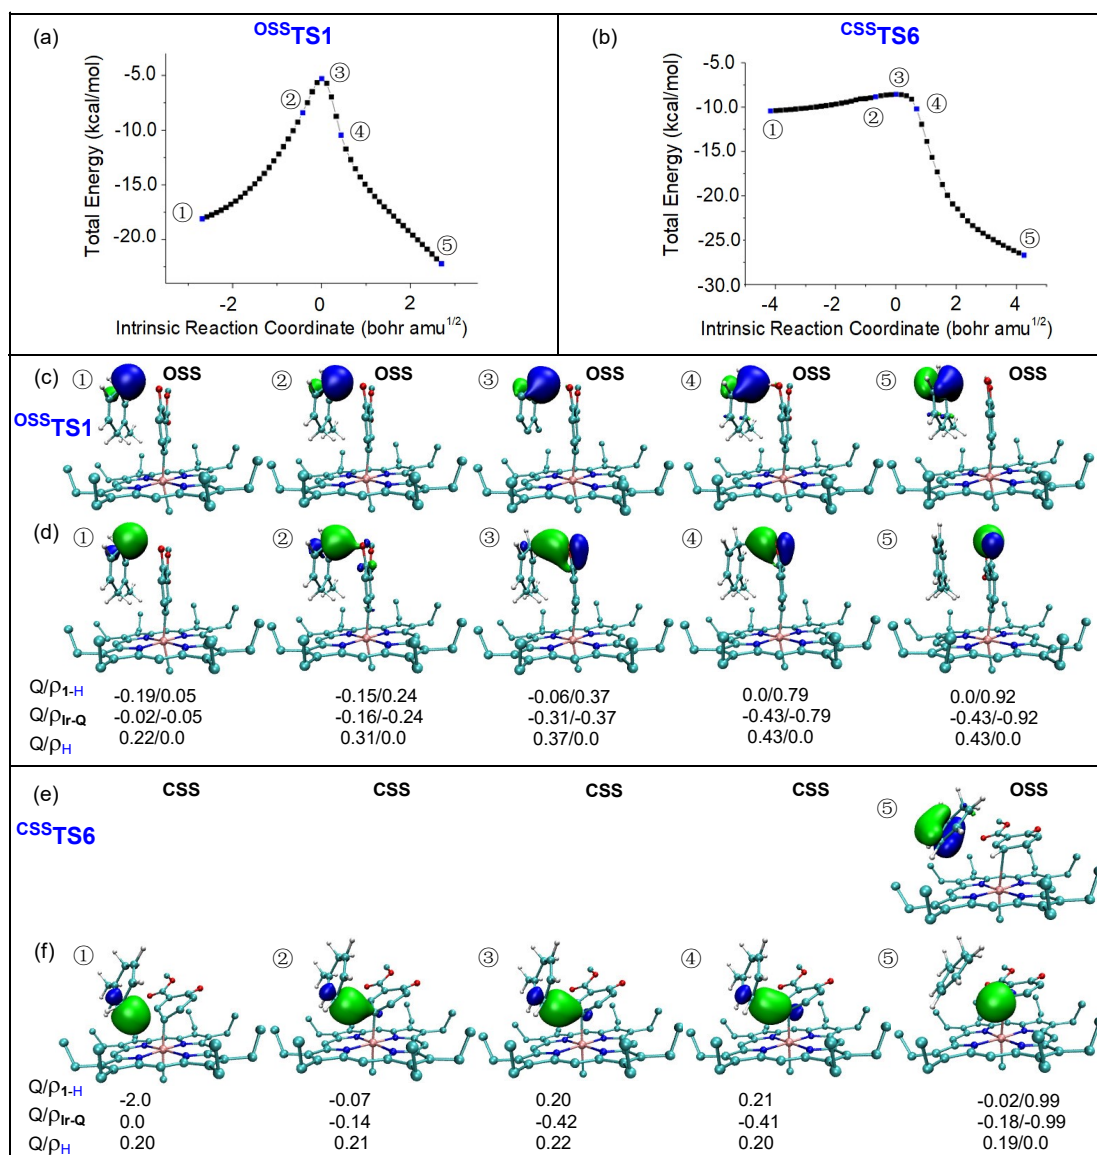

**Figure S14.** Plots of the change in electronic energies along the intrinsic reaction coordinate (IRC) for <sup>oss</sup>TSS1 (a) and <sup>css</sup>TSS6 (b). (c) α-LMOs and (d) β-LMO analysis along the IRC between quinoid oxygen of the Ir-QC and **1**, and the Mulliken charges (Q) and spin densities (ρ) on the hydrogen-atom abstracted moieties (1-H) and on the Ir-QC. (e) α-LMOs and (f) LMO analysis along the IRC between carbene carbon of the Ir-QC and **1**, and the Mulliken charges (Q) and spin densities (ρ) on the hydrogen-atom abstracted moieties (1-H) and on the Ir-QC.

**Table S1. Electronic Energies and Free Energies (in Hartree) of the Structures Calculated at the (U)B3LYP-D3/6-311+G(d,p)-SDD//(U)B3LYP-D3/6-31G(d)-LANL2DZ Level of Theory**

| Structures           | ZPVE     | TCE      | TCH      | TCG      | E <sub>gas</sub> | G <sub>gas</sub> (E <sub>gas</sub> +TCG) | Imaginary<br>Frequenc<br>y | ΔG <sub>gas</sub><br>(kcal/mol) |
|----------------------|----------|----------|----------|----------|------------------|------------------------------------------|----------------------------|---------------------------------|
| <sup>oss</sup> Ir-QC | 0.89475  | 0.948951 | 0.949896 | 0.818098 | -2296.593992     | -2295.775894                             | —                          | —                               |
| <sup>css</sup> Ir-QC | 0.895536 | 0.949566 | 0.950510 | 0.819079 | -2296.593686     | -2295.774607                             | —                          | —                               |

|                    |          |          |          |          |              |              |           |       |
|--------------------|----------|----------|----------|----------|--------------|--------------|-----------|-------|
| <sup>3</sup> Ir-QC | 0.893948 | 0.948393 | 0.949337 | 0.81601  | -2296.590055 | -2295.774045 | —         | —     |
| 1                  | 0.150651 | 0.157387 | 0.158331 | 0.120221 | -272.823116  | -272.702895  | —         | —     |
| osSTS1             | 1.041722 | 1.103034 | 1.103978 | 0.959249 | -2569.422176 | -2568.462927 | 1713.04i  | 10.0  |
| <sup>3</sup> TS1   | 1.041242 | 1.102879 | 1.103824 | 0.95745  | -2569.4187   | -2568.46125  | 1651.76i  | 11.0  |
| 6                  | 0.137144 | 0.143721 | 0.144666 | 0.10635  | -272.196611  | -272.090261  | —         | —     |
| <sup>2</sup> INT1  | 0.90738  | 0.961729 | 0.962673 | 0.829899 | -2297.24035  | -2296.410451 | —         | —     |
| osSTS2             | 1.047302 | 1.108757 | 1.109701 | 0.964309 | -2569.449403 | -2568.485094 | 158.11i   | -4.0  |
| <sup>3</sup> TS2   | 1.046964 | 1.107977 | 1.108921 | 0.963571 | -2569.408883 | -2568.445312 | 482.38i   | 21.0  |
| 3a                 | 0.280012 | 0.2967   | 0.297644 | 0.237568 | -807.149171  | -806.911603  | —         | —     |
| cssIr              | 0.769757 | 0.812275 | 0.813219 | 0.703127 | -1762.349742 | -1761.646615 | —         | —     |
| <sup>2</sup> TS3   | 0.907473 | 0.96106  | 0.962004 | 0.830493 | -2297.214069 | -2296.383576 | 29.05i    | 3.1   |
| osSTS4             | 1.041845 | 1.103001 | 1.103945 | 0.959576 | -2569.408918 | -2568.449342 | 1825.03i  | 18.5  |
| <sup>3</sup> TS4   | 1.041681 | 1.102909 | 1.103854 | 0.958244 | -2569.406451 | -2568.448207 | 1868.79i  | 19.2  |
| 8                  | 0.136912 | 0.14344  | 0.144385 | 0.10617  | -272.173432  | -272.067262  | —         | —     |
| osSTS5             | 1.047258 | 1.108507 | 1.109451 | 0.964602 | -2569.425627 | -2568.461025 | 218.85i   | 11.1  |
| <sup>3</sup> TS5   | 1.047125 | 1.107931 | 1.108875 | 0.963937 | -2569.399768 | -2568.435831 | 452.51i   | 27.0  |
| 9                  | 0.280628 | 0.297079 | 0.298023 | 0.238337 | -807.147976  | -806.909639  | —         | —     |
| cssTS6             | 1.044781 | 1.106056 | 1.107000 | 0.962122 | -2569.424986 | -2568.462864 | 265.08i   | 10.0  |
| <sup>3</sup> TS6   | 1.042446 | 1.103865 | 1.104809 | 0.958396 | -2569.414041 | -2568.455645 | 1186.91i  | 14.5  |
| <sup>2</sup> INT2  | 0.907099 | 0.961535 | 0.962479 | 0.829209 | -2297.251192 | -2296.421983 | —         | —     |
| cssTS7             | 1.048843 | 1.11005  | 1.110995 | 0.965949 | -2569.478221 | -2568.512272 | 26.81i    | -21.0 |
| <sup>3</sup> TS7   | 1.04638  | 1.107227 | 1.108171 | 0.962749 | -2569.412132 | -2568.449383 | 707.08i   | 18.5  |
| 10                 | 0.279018 | 0.295851 | 0.296795 | 0.236599 | -807.107428  | -806.870829  | —         | —     |
| 11                 | 0.135003 | 0.144756 | 0.145700 | 0.099430 | -534.863879  | -534.764449  | —         | —     |
| cssTS8             | 0.553821 | 0.588167 | 0.589112 | 0.495167 | -1614.210201 | -1613.715034 | 1167.81i  | -7.6  |
| cssTS9             | 1.044015 | 1.10501  | 1.105954 | 0.961606 | -2569.415028 | -2568.453422 | 781.7i    | 15.9  |
| <sup>3</sup> TS9   | 1.042675 | 1.103875 | 1.10482  | 0.958727 | -2569.401113 | -2568.442386 | 1547.82i  | 22.8  |
| osSTS10            | 1.046782 | 1.108486 | 1.10943  | 0.96353  | -2569.44246  | -2568.47893  | 132.26i   | -0.1  |
| <sup>3</sup> TS10  | 1.04582  | 1.107043 | 1.107987 | 0.961398 | -2569.39497  | -2568.433572 | 884.94i   | 28.4  |
| 12                 | 0.279545 | 0.296364 | 0.297308 | 0.236849 | -807.103384  | -806.866535  | —         | —     |
| cssTS11            | 0.555525 | 0.589419 | 0.590363 | 0.496824 | -1614.206863 | -1613.710039 | 1316.41i  | -7.1  |
| osSTS12            | 1.812411 | 1.921867 | 1.922811 | 1.689328 | -4594.501271 | -4592.811943 | 1458.61i  | -0.9  |
| osSTS14            | 1.041421 | 1.10288  | 1.103824 | 0.958824 | -2569.419301 | -2568.460477 | -1770.65i | 11.5  |
| 4                  | 0.175197 | 0.182162 | 0.183106 | 0.144637 | -274.055283  | -273.910646  | —         | —     |
| osSTS15            | 1.065891 | 1.127684 | 1.128628 | 0.982986 | -2570.642842 | -2569.659856 | 1900.33i  | 16.7  |
| 13                 | 0.161184 | 0.168234 | 0.169179 | 0.129842 | -273.414207  | -273.284365  | —         | —     |
| osSTS16            | 1.07071  | 1.132822 | 1.133766 | 0.987086 | -2570.66628  | -2569.679194 | 112.98    | 4.6   |
| 15                 | 0.304613 | 0.321449 | 0.322393 | 0.262104 | -808.381588  | -808.119484  | —         | —     |

|                     |          |          |          |          |              |              |          |      |
|---------------------|----------|----------|----------|----------|--------------|--------------|----------|------|
| <sup>oss</sup> TS17 | 1.066604 | 1.128011 | 1.128955 | 0.983978 | -2570.642371 | -2569.658393 | 1830.52i | 17.7 |
| 14                  | 0.161559 | 0.168254 | 0.169198 | 0.130676 | -273.406300  | -273.275624  | —        | —    |
| <sup>oss</sup> TS18 | 1.071484 | 1.133095 | 1.134039 | 0.988482 | -2570.657453 | -2569.668971 | 171.23i  | 11.0 |
| 5                   | 0.305114 | 0.321801 | 0.322745 | 0.262777 | -808.379861  | -808.117084  | —        | —    |
| <sup>css</sup> TS19 | 1.068491 | 1.129916 | 1.13086  | 0.985775 | -2570.655697 | -2569.669922 | 585.54i  | 10.4 |
| <sup>oss</sup> TS20 | 1.067029 | 1.128644 | 1.129588 | 0.982663 | -2570.640904 | -2569.658241 | 13.28i   | -8.6 |
| 16                  | 0.161184 | 0.168234 | 0.169179 | 0.129842 | -273.414207  | -273.284365  | —        | —    |
| <sup>css</sup> TS21 | 0.907099 | 0.961535 | 0.962479 | 0.829209 | -2297.251192 | -2296.421983 | 1222.13i | -8.2 |
| <sup>css</sup> TS22 | 1.068562 | 1.129811 | 1.130755 | 0.985991 | -2570.649675 | -2569.663684 | 712.49i  | 14.3 |
| <sup>oss</sup> TS23 | 0.161559 | 0.168254 | 0.169198 | 0.130676 | -273.406300  | -273.275624  | 38.31i   | -1.9 |
| 17                  | 0.907099 | 0.961535 | 0.962479 | 0.829209 | -2297.251192 | -2296.421983 | —        | —    |
| <sup>css</sup> TS24 | 1.071228 | 1.133125 | 1.134069 | 0.987891 | -2570.67748  | -2569.689589 | 1283.35i | -6.6 |
| <sup>oss</sup> TS25 | 1.047096 | 1.108387 | 1.109331 | 0.964119 | -2569.444793 | -2568.480674 | 91.74i   | -1.2 |

ZPVE = zero-point vibrational energy; TCE = thermal correction to energy; TCH = thermal correction to enthalpy; TCG = thermal correction to Gibbs free energy.

## Cartesian coordinates of the structures

(U)B3LYP-D3/6-311+G(d,p)-SDD/(U)B3LYP-D3/6-31G(d)-LANL2DZ

<sup>oss</sup>Ir-QC

|   |             |             |             |
|---|-------------|-------------|-------------|
| N | 1.03832900  | -1.27039100 | -1.34038900 |
| N | 0.80342400  | 1.62500800  | -1.22442200 |
| N | -1.99297000 | 1.39159500  | -0.55234100 |
| N | -1.80045600 | -1.50363800 | -0.63772700 |
| C | 0.94137900  | -2.63670500 | -1.28347600 |
| C | 2.24439400  | -3.22278000 | -1.55527700 |
| C | 3.10873800  | -2.18146400 | -1.77802400 |
| C | 2.33075800  | -0.96068000 | -1.65139700 |
| C | 2.83223900  | 0.33711400  | -1.75578000 |
| C | 2.14330300  | 1.52279900  | -1.53648800 |
| C | 2.73811000  | 2.84720600  | -1.55492500 |
| C | 1.73529100  | 3.73840000  | -1.27504100 |
| C | 0.52526600  | 2.96144400  | -1.07089200 |
| C | -0.72470100 | 3.48152700  | -0.75539000 |
| C | -1.89233600 | 2.76268800  | -0.52289300 |
| C | -3.18676900 | 3.33839200  | -0.21016200 |
| C | -4.06343400 | 2.29399000  | -0.05979300 |
| C | -3.30947400 | 1.07430200  | -0.27671300 |

|    |             |             |             |
|----|-------------|-------------|-------------|
| C  | -3.82824400 | -0.21156500 | -0.19946900 |
| C  | -3.13342900 | -1.41127800 | -0.35707200 |
| C  | -3.69741100 | -2.74350200 | -0.22187700 |
| C  | -2.67099000 | -3.62812600 | -0.43642100 |
| C  | -1.48245400 | -2.83516700 | -0.70656900 |
| C  | -0.22170500 | -3.34843800 | -1.00319700 |
| H  | -0.79759300 | 4.56082300  | -0.68669500 |
| H  | 3.88854900  | 0.42841000  | -1.97876200 |
| H  | -0.13605300 | -4.42917800 | -1.01692600 |
| H  | -4.88651400 | -0.29212900 | 0.02167600  |
| C  | -0.95227300 | -0.25099000 | -2.99742900 |
| H  | -0.18801000 | 0.27183100  | -3.57941000 |
| H  | -0.95054600 | -1.31707500 | -3.22738600 |
| H  | -1.94643200 | 0.17711900  | -3.15904300 |
| Ir | -0.48138600 | 0.08139700  | -0.89130300 |
| C  | 4.20646100  | 3.11264200  | -1.71355800 |
| C  | 4.96963200  | 2.91168000  | -0.38686500 |
| H  | 4.36265900  | 4.13598900  | -2.07493700 |
| H  | 4.62772300  | 2.45311300  | -2.48324600 |
| H  | 6.04862700  | 3.03762000  | -0.53422900 |
| H  | 4.63920700  | 3.64514600  | 0.35718900  |
| H  | 4.78585900  | 1.91873500  | 0.03676300  |
| C  | 1.83085400  | 5.22693500  | -1.10669800 |
| C  | 1.87615300  | 5.65574600  | 0.37343000  |
| H  | 0.97905500  | 5.71416600  | -1.60013100 |
| H  | 2.72788800  | 5.59579800  | -1.61722600 |
| H  | 1.93793400  | 6.74624000  | 0.46430100  |
| H  | 0.98236300  | 5.31600800  | 0.90822100  |
| H  | 2.74566900  | 5.21802900  | 0.87533200  |
| C  | -3.44407400 | 4.80565500  | -0.02501900 |
| C  | -2.98160100 | 5.31741500  | 1.35367800  |
| H  | -4.51428000 | 5.00963500  | -0.14551900 |
| H  | -2.93639600 | 5.37633100  | -0.81377000 |
| H  | -3.17129200 | 6.39180300  | 1.45759400  |
| H  | -3.51214100 | 4.79483100  | 2.15723500  |
| H  | -1.90990300 | 5.14172600  | 1.49806400  |
| C  | -5.51174300 | 2.34317100  | 0.33280000  |
| C  | -5.72830600 | 2.05130800  | 1.83085000  |
| H  | -6.08685600 | 1.62383700  | -0.26506800 |
| H  | -5.92350100 | 3.33065800  | 0.09458300  |
| H  | -6.79305500 | 2.08457600  | 2.08837600  |
| H  | -5.34098100 | 1.06159100  | 2.09729200  |
| H  | -5.20158300 | 2.78800000  | 2.44733200  |
| C  | -5.11891800 | -3.03319800 | 0.16394300  |



|   |             |             |             |
|---|-------------|-------------|-------------|
| C | -5.36572000 | -2.86503800 | 1.67622000  |
| H | -5.37987300 | -4.05565400 | -0.13278000 |
| H | -5.79995900 | -2.37423700 | -0.39094300 |
| H | -6.41062700 | -3.07537300 | 1.93146800  |
| H | -4.72714500 | -3.54656800 | 2.24902000  |
| H | -5.13244600 | -1.84431100 | 1.99989000  |
| C | -2.69629700 | -5.12632000 | -0.34526500 |
| C | -2.13962700 | -5.64581000 | 0.99508800  |
| H | -2.11932700 | -5.56194100 | -1.17171400 |
| H | -3.72423300 | -5.48502900 | -0.47295500 |
| H | -2.16116000 | -6.74096200 | 1.03202600  |
| H | -1.10523600 | -5.31674700 | 1.14389700  |
| H | -2.73090800 | -5.26131800 | 1.83351800  |
| C | 2.55075700  | -4.69111900 | -1.49446700 |
| C | 2.67397600  | -5.21238400 | -0.04882900 |
| H | 3.48487000  | -4.89185100 | -2.03175700 |
| H | 1.77076900  | -5.25877800 | -2.01967400 |
| H | 2.89189600  | -6.28645700 | -0.03577600 |
| H | 3.47749200  | -4.69098500 | 0.48232300  |
| H | 1.74701100  | -5.04254600 | 0.50995300  |
| C | 4.59637000  | -2.22319500 | -1.97073700 |
| C | 5.35209300  | -2.04400400 | -0.63698700 |
| H | 4.90639300  | -1.44137000 | -2.67606900 |
| H | 4.88570600  | -3.17582600 | -2.43043800 |
| H | 6.43519500  | -2.00862400 | -0.80302300 |
| H | 5.04593700  | -1.12812200 | -0.12047200 |
| H | 5.13769700  | -2.88067000 | 0.03744700  |
| C | 0.08290200  | -0.26182600 | 1.04694500  |
| C | -0.84604300 | -0.59280900 | 2.08158400  |
| C | 1.45885600  | -0.22046500 | 1.40110300  |
| C | -0.44606900 | -0.59214000 | 3.38927700  |
| H | -1.89297700 | -0.74113900 | 1.83864500  |
| C | 1.91027500  | -0.20536200 | 2.70169600  |
| H | 2.21103400  | -0.11408000 | 0.63326700  |
| C | 0.94520300  | -0.37408800 | 3.80717000  |
| O | 1.23683400  | -0.34914000 | 5.01309100  |
| H | -1.15725300 | -0.71788900 | 4.20141600  |
| C | 3.38146800  | -0.02714400 | 2.86438100  |
| O | 4.14335300  | 0.20666000  | 1.93364100  |
| O | 3.81583700  | -0.16777200 | 4.12720200  |
| C | 5.23036000  | -0.01710400 | 4.30420400  |
| H | 5.77623200  | -0.76957000 | 3.72642400  |
| H | 5.55792400  | 0.97586500  | 3.98126400  |
| H | 5.40348300  | -0.15133500 | 5.37251900  |

**cssIr-QC**

|    |             |             |             |
|----|-------------|-------------|-------------|
| N  | 0.99836500  | -1.34226200 | -1.31342200 |
| N  | 0.86521800  | 1.56378100  | -1.24401400 |
| N  | -1.93845400 | 1.43971900  | -0.57457400 |
| N  | -1.84645400 | -1.46527100 | -0.60938900 |
| C  | 0.85175800  | -2.70391600 | -1.24205600 |
| C  | 2.13300000  | -3.33843900 | -1.50884900 |
| C  | 3.03373100  | -2.33109100 | -1.74340100 |
| C  | 2.30011900  | -1.08183700 | -1.63030700 |
| C  | 2.84739900  | 0.19596900  | -1.74971700 |
| C  | 2.20024700  | 1.40866800  | -1.55098700 |
| C  | 2.84196600  | 2.71074100  | -1.58884500 |
| C  | 1.87080900  | 3.64142700  | -1.32614400 |
| C  | 0.63363600  | 2.91120000  | -1.11252800 |
| C  | -0.59776200 | 3.48013200  | -0.80869200 |
| C  | -1.79065100 | 2.80615000  | -0.56941800 |
| C  | -3.06636500 | 3.43145100  | -0.27479800 |
| C  | -3.97906600 | 2.42044800  | -0.11164400 |
| C  | -3.26582600 | 1.17196700  | -0.30257800 |
| C  | -3.82893600 | -0.09390900 | -0.20460300 |
| C  | -3.17659100 | -1.32004700 | -0.33825900 |
| C  | -3.78891700 | -2.62908100 | -0.18844700 |
| C  | -2.79457400 | -3.55324400 | -0.38802000 |
| C  | -1.57680200 | -2.80796100 | -0.66321700 |
| C  | -0.33575800 | -3.37047000 | -0.95443400 |
| H  | -0.63298600 | 4.56229600  | -0.75814700 |
| H  | 3.90667300  | 0.24666400  | -1.97135500 |
| H  | -0.28955400 | -4.45365500 | -0.95720500 |
| H  | -4.89064300 | -0.13360200 | 0.01091300  |
| C  | -0.95933500 | -0.26702300 | -2.96233600 |
| H  | -0.19406700 | 0.23570000  | -3.56202600 |
| H  | -0.97729000 | -1.33361600 | -3.19208200 |
| H  | -1.94761300 | 0.17207100  | -3.13412700 |
| Ir | -0.47028100 | 0.07056700  | -0.87890900 |
| C  | 4.31900800  | 2.92167800  | -1.74837900 |
| C  | 5.07192800  | 2.71908800  | -0.41608800 |
| H  | 4.51156200  | 3.93199700  | -2.12839800 |
| H  | 4.71856700  | 2.23359000  | -2.50447900 |
| H  | 6.15489500  | 2.80554500  | -0.56279500 |
| H  | 4.76508600  | 3.47708600  | 0.31337300  |
| H  | 4.85338900  | 1.74090600  | 0.02497800  |
| C  | 2.01853100  | 5.12826200  | -1.18211300 |
| C  | 2.07525600  | 5.57988300  | 0.29082600  |

|   |             |             |             |
|---|-------------|-------------|-------------|
| H | 1.18570800  | 5.63693000  | -1.68616600 |
| H | 2.92929800  | 5.45662300  | -1.69596600 |
| H | 2.17475500  | 6.66893100  | 0.36365100  |
| H | 1.16891700  | 5.28044200  | 0.82854300  |
| H | 2.92780300  | 5.12076400  | 0.80261500  |
| C | -3.27405500 | 4.90964100  | -0.11656000 |
| C | -2.80349800 | 5.42831100  | 1.25679200  |
| H | -4.33574400 | 5.14824800  | -0.24832000 |
| H | -2.74166100 | 5.44890400  | -0.91106100 |
| H | -2.95708100 | 6.51009900  | 1.34173700  |
| H | -3.35687700 | 4.93740000  | 2.06489800  |
| H | -1.73941700 | 5.21861200  | 1.41173000  |
| C | -5.42712900 | 2.52612300  | 0.27063500  |
| C | -5.66258100 | 2.26974800  | 1.77235700  |
| H | -6.02293300 | 1.81585100  | -0.31771100 |
| H | -5.80343700 | 3.52246700  | 0.01156300  |
| H | -6.72717200 | 2.34375000  | 2.02192000  |
| H | -5.31070700 | 1.27264500  | 2.05963100  |
| H | -5.11509900 | 2.99955200  | 2.37888100  |
| C | -5.22176000 | -2.86200300 | 0.19391400  |
| C | -5.46990400 | -2.66270100 | 1.70219700  |
| H | -5.51782200 | -3.87867900 | -0.08933600 |
| H | -5.87588900 | -2.18732300 | -0.37426700 |
| H | -6.52305500 | -2.83124400 | 1.95451100  |
| H | -4.85960000 | -3.35838800 | 2.28869000  |
| H | -5.20151200 | -1.64637000 | 2.01221500  |
| C | -2.87518700 | -5.04826300 | -0.27913800 |
| C | -2.33997900 | -5.57126000 | 1.06852400  |
| H | -2.31339200 | -5.51469700 | -1.09917900 |
| H | -3.91544600 | -5.37032600 | -0.40442100 |
| H | -2.40289500 | -6.66423700 | 1.11944700  |
| H | -1.29403700 | -5.27958500 | 1.21458300  |
| H | -2.91728400 | -5.15385500 | 1.90093900  |
| C | 2.38680400  | -4.81609300 | -1.43368100 |
| C | 2.49322100  | -5.32724500 | 0.01687300  |
| H | 3.31241800  | -5.05529500 | -1.96988500 |
| H | 1.58631400  | -5.36046400 | -1.95259600 |
| H | 2.67235900  | -6.40827700 | 0.04016600  |
| H | 3.31577800  | -4.83002600 | 0.54203600  |
| H | 1.57367700  | -5.11878600 | 0.57485400  |
| C | 4.51865200  | -2.42754800 | -1.93710300 |
| C | 5.28169500  | -2.25763400 | -0.60627900 |
| H | 4.85473800  | -1.66618000 | -2.65278600 |
| H | 4.77378300  | -3.39555400 | -2.38471500 |

|   |             |             |             |
|---|-------------|-------------|-------------|
| H | 6.36514300  | -2.26209800 | -0.77361700 |
| H | 5.00816100  | -1.32512800 | -0.10125400 |
| H | 5.03915700  | -3.07765200 | 0.07896400  |
| C | 0.07130900  | -0.27929400 | 1.04885300  |
| C | -0.87204000 | -0.57156400 | 2.09016700  |
| C | 1.44986700  | -0.29887100 | 1.40512200  |
| C | -0.48271100 | -0.48660800 | 3.39335500  |
| H | -1.91791800 | -0.72157300 | 1.84512800  |
| C | 1.89164900  | -0.19072700 | 2.70181300  |
| H | 2.20932100  | -0.28664800 | 0.63697700  |
| C | 0.91209000  | -0.25134900 | 3.81214900  |
| O | 1.19133500  | -0.13723000 | 5.01009400  |
| H | -1.20239100 | -0.54255600 | 4.20581700  |
| C | 3.36442300  | -0.03610100 | 2.86212200  |
| O | 4.14090200  | 0.08760900  | 1.92177200  |
| O | 3.78352500  | -0.06352300 | 4.13774200  |
| C | 5.19968200  | 0.06810000  | 4.31565500  |
| H | 5.73106400  | -0.75132600 | 3.82153000  |
| H | 5.55629900  | 1.01566700  | 3.90017200  |
| H | 5.35937600  | 0.03584900  | 5.39397700  |

### **<sup>3</sup>Ir-QC**

|   |             |             |             |
|---|-------------|-------------|-------------|
| N | 0.89828700  | -1.46161600 | -1.28422000 |
| N | 0.89882400  | 1.46137200  | -1.28420500 |
| N | -1.92400200 | 1.44170100  | -0.60573500 |
| N | -1.92455300 | -1.44091900 | -0.60581000 |
| C | 0.71755200  | -2.81132700 | -1.17488900 |
| C | 1.97679700  | -3.49630100 | -1.41676200 |
| C | 2.90838400  | -2.52522500 | -1.67877300 |
| C | 2.21451100  | -1.24957000 | -1.60366000 |
| C | 2.80714900  | -0.00047300 | -1.77524600 |
| C | 2.21496100  | 1.24883200  | -1.60367700 |
| C | 2.90927900  | 2.52424700  | -1.67892100 |
| C | 1.97802700  | 3.49567000  | -1.41704600 |
| C | 0.71854800  | 2.81114900  | -1.17504300 |
| C | -0.49521800 | 3.42659300  | -0.87362200 |
| C | -1.70994100 | 2.80647200  | -0.61303800 |
| C | -2.94944800 | 3.49223500  | -0.29936200 |
| C | -3.90357400 | 2.52611200  | -0.10695600 |
| C | -3.25107400 | 1.24469100  | -0.30012900 |
| C | -3.85998500 | 0.00074600  | -0.17167500 |
| C | -3.25158100 | -1.24342200 | -0.30033500 |
| C | -3.90459700 | -2.52461500 | -0.10735400 |
| C | -2.95083600 | -3.49108600 | -0.29979700 |

|    |             |             |             |
|----|-------------|-------------|-------------|
| C  | -1.71100700 | -2.80576000 | -0.61318800 |
| C  | -0.49647000 | -3.42632300 | -0.87358000 |
| H  | -0.48986700 | 4.51019200  | -0.83716000 |
| H  | 3.86518000  | -0.00066400 | -2.00952100 |
| H  | -0.49151500 | -4.50992200 | -0.83709200 |
| H  | -4.91631800 | 0.00094300  | 0.07190000  |
| C  | -0.69137100 | 0.00035900  | -3.13528700 |
| H  | 0.31004000  | -0.00011300 | -3.56336500 |
| H  | -1.24466800 | -0.90920400 | -3.37809700 |
| H  | -1.24370100 | 0.91058400  | -3.37780500 |
| Ir | -0.52615000 | 0.00014100  | -0.91695800 |
| C  | 4.39027600  | 2.67576200  | -1.86794700 |
| C  | 5.15964700  | 2.49174800  | -0.54274600 |
| H  | 4.61205200  | 3.66513600  | -2.28573200 |
| H  | 4.75234100  | 1.94870700  | -2.60633800 |
| H  | 6.24209500  | 2.54156300  | -0.70946200 |
| H  | 4.88749400  | 3.28030200  | 0.16787100  |
| H  | 4.92127300  | 1.53432400  | -0.06785600 |
| C  | 2.18208900  | 4.97814300  | -1.29772100 |
| C  | 2.26648900  | 5.45046500  | 0.16730100  |
| H  | 1.36553000  | 5.51076100  | -1.80398400 |
| H  | 3.10081900  | 5.26408500  | -1.82287000 |
| H  | 2.40859200  | 6.53587600  | 0.22287800  |
| H  | 1.35288100  | 5.19480500  | 0.71547100  |
| H  | 3.10370500  | 4.96614700  | 0.68123000  |
| C  | -3.08697700 | 4.97956800  | -0.14802700 |
| C  | -2.56663700 | 5.48568200  | 1.21190300  |
| H  | -4.13943300 | 5.26460300  | -0.26059000 |
| H  | -2.54746800 | 5.48978300  | -0.95685400 |
| H  | -2.67050000 | 6.57373400  | 1.29235400  |
| H  | -3.12499600 | 5.02468100  | 2.03409300  |
| H  | -1.51004200 | 5.22993000  | 1.34765700  |
| C  | -5.33604300 | 2.69811500  | 0.30768200  |
| C  | -5.54723600 | 2.46024900  | 1.81617800  |
| H  | -5.97586600 | 2.01091500  | -0.26174700 |
| H  | -5.67460900 | 3.70856700  | 0.05116500  |
| H  | -6.60159000 | 2.58093300  | 2.08985800  |
| H  | -5.23180800 | 1.45049900  | 2.10180200  |
| H  | -4.95519600 | 3.16929000  | 2.40521800  |
| C  | -5.33718800 | -2.69611800 | 0.30707400  |
| C  | -5.54846100 | -2.45863500 | 1.81562000  |
| H  | -5.67617100 | -3.70633600 | 0.05018400  |
| H  | -5.97663500 | -2.00844700 | -0.26220500 |
| H  | -6.60290500 | -2.57892000 | 2.08913200  |

|          |             |             |             |
|----------|-------------|-------------|-------------|
| H        | -4.95682300 | -3.16812800 | 2.40451900  |
| H        | -5.23260600 | -1.44911700 | 2.10159700  |
| C        | -3.08896800 | -4.97838500 | -0.14867700 |
| C        | -2.56908400 | -5.48485200 | 1.21129500  |
| H        | -2.54948500 | -5.48870800 | -0.95745200 |
| H        | -4.14151000 | -5.26300700 | -0.26148800 |
| H        | -2.67336500 | -6.57287600 | 1.29159600  |
| H        | -1.51242000 | -5.22950700 | 1.34727900  |
| H        | -3.12743000 | -5.02374200 | 2.03343000  |
| C        | 2.18035700  | -4.97882700 | -1.29725100 |
| C        | 2.26421900  | -5.45105800 | 0.16783500  |
| H        | 3.09914400  | -5.26509700 | -1.82212000 |
| H        | 1.36376800  | -5.51123800 | -1.80368800 |
| H        | 2.40598900  | -6.53650600 | 0.22352700  |
| H        | 3.10143600  | -4.96694700 | 0.68195600  |
| H        | 1.35054200  | -5.19509200 | 0.71574300  |
| C        | 4.38931900  | -2.67733500 | -1.86782400 |
| C        | 5.15875200  | -2.49411100 | -0.54255500 |
| H        | 4.75171600  | -1.95018000 | -2.60595000 |
| H        | 4.61065600  | -3.66665400 | -2.28597400 |
| H        | 6.24118100  | -2.54432600 | -0.70928000 |
| H        | 4.92076600  | -1.53674500 | -0.06735400 |
| H        | 4.88627000  | -3.28279600 | 0.16779100  |
| C        | 0.14949100  | -0.00015700 | 1.05233500  |
| C        | -0.80419600 | -0.00022500 | 2.10696000  |
| C        | 1.51715400  | -0.00030900 | 1.39812200  |
| C        | -0.39159600 | -0.00054600 | 3.41782300  |
| H        | -1.86568400 | -0.00005200 | 1.87649200  |
| C        | 1.97944000  | -0.00058200 | 2.70144400  |
| H        | 2.26914600  | -0.00019500 | 0.62338100  |
| C        | 1.01516700  | -0.00081200 | 3.81089900  |
| O        | 1.32235900  | -0.00131300 | 5.02228100  |
| H        | -1.10478300 | -0.00067300 | 4.23794800  |
| C        | 3.46350000  | -0.00060300 | 2.85134500  |
| O        | 4.23920400  | -0.00114700 | 1.90271900  |
| O        | 3.89211500  | 0.00015400  | 4.12372400  |
| C        | 5.31639700  | 0.00017300  | 4.28559800  |
| H        | 5.75930500  | -0.88871200 | 3.82567500  |
| H        | 5.75937200  | 0.88860000  | 3.82484800  |
| H        | 5.48426200  | 0.00067100  | 5.36316000  |
| <b>1</b> |             |             |             |
| C        | 0.22601300  | -1.21007600 | -0.00003800 |
| C        | 0.95292500  | -0.08696500 | 0.00001200  |

|   |             |             |             |
|---|-------------|-------------|-------------|
| C | 0.30596400  | 1.28074800  | -0.00021000 |
| C | -1.19944300 | 1.24628700  | 0.00013900  |
| C | -1.90882900 | 0.11633700  | 0.00011500  |
| C | -1.27965100 | -1.25132600 | -0.00009700 |
| H | 0.66698900  | 1.85580000  | 0.87017300  |
| H | 0.73535500  | -2.17367500 | 0.00017300  |
| H | -1.70938200 | 2.20859600  | 0.00036800  |
| H | -2.99701900 | 0.15744900  | 0.00025500  |
| H | -1.63775900 | -1.82599800 | 0.87108700  |
| H | -1.63774700 | -1.82569000 | -0.87151300 |
| H | 0.66658100  | 1.85512100  | -0.87124300 |
| C | 2.45907000  | -0.09487100 | 0.00010700  |
| H | 2.85650400  | 0.42944500  | 0.88098800  |
| H | 2.86344900  | -1.11249700 | -0.00052300 |
| H | 2.85673700  | 0.43065400  | -0.87993800 |

### osTS1

|   |             |             |             |
|---|-------------|-------------|-------------|
| N | 2.67980200  | 0.61504200  | -0.53958700 |
| N | 0.27959200  | 2.08476100  | -1.34228700 |
| N | -1.05701300 | -0.43237000 | -1.88776700 |
| N | 1.29334900  | -1.88585900 | -1.05337700 |
| C | 3.70077900  | -0.23918700 | -0.23211200 |
| C | 4.86273800  | 0.52289700  | 0.19559000  |
| C | 4.50891600  | 1.84624700  | 0.13336100  |
| C | 3.13223100  | 1.89064400  | -0.33491500 |
| C | 2.38521000  | 3.04960900  | -0.53489700 |
| C | 1.06834800  | 3.14392500  | -0.97589900 |
| C | 0.31212300  | 4.38021200  | -1.11143600 |
| C | -0.93296000 | 4.03431100  | -1.56759100 |
| C | -0.93214900 | 2.58824900  | -1.72245100 |
| C | -2.00754300 | 1.81950200  | -2.16523900 |
| C | -2.06508500 | 0.43457700  | -2.25942800 |
| C | -3.19413200 | -0.32375500 | -2.76739900 |
| C | -2.84588000 | -1.64908600 | -2.70502700 |
| C | -1.51146700 | -1.70726600 | -2.13400900 |
| C | -0.80271400 | -2.87126700 | -1.85714500 |
| C | 0.48449700  | -2.95959000 | -1.33783400 |
| C | 1.19345300  | -4.19433800 | -1.04974700 |
| C | 2.44468300  | -3.84197900 | -0.61381500 |
| C | 2.50468600  | -2.39101100 | -0.63227500 |
| C | 3.61454000  | -1.63043900 | -0.28095600 |
| H | -2.90091900 | 2.36081400  | -2.45399100 |
| H | 2.88450600  | 3.98634500  | -0.31355000 |
| H | 4.50474900  | -2.17950600 | 0.00473400  |

|    |             |             |             |
|----|-------------|-------------|-------------|
| H  | -1.30378100 | -3.80808800 | -2.07386100 |
| C  | 1.67165200  | 0.35763600  | -3.15966500 |
| H  | 2.18001200  | 1.32279300  | -3.20544600 |
| H  | 2.38019100  | -0.46134900 | -3.31570400 |
| H  | 0.85176700  | 0.31903800  | -3.88408100 |
| C  | 0.24169600  | 0.27415300  | 0.82732500  |
| C  | 0.98666200  | -0.33415100 | 1.86658700  |
| C  | -0.90751900 | 0.99347400  | 1.20104100  |
| C  | 0.48511500  | -0.39525800 | 3.15159600  |
| H  | 1.92279400  | -0.83377700 | 1.64240900  |
| C  | -1.44185300 | 0.95361100  | 2.48878800  |
| H  | -1.46485700 | 1.55616400  | 0.46426600  |
| C  | -0.75607100 | 0.20932700  | 3.50993700  |
| O  | -1.22522300 | 0.01989400  | 4.71677800  |
| Ir | 0.77984500  | 0.08438800  | -1.17847200 |
| H  | 0.99834300  | -0.94438800 | 3.93537600  |
| C  | -2.73944500 | 1.66243800  | 2.66604600  |
| O  | -3.37844600 | 2.14748700  | 1.74258100  |
| O  | -3.16891700 | 1.73249100  | 3.94244700  |
| C  | -4.42374500 | 2.40023500  | 4.12090800  |
| H  | -4.37321900 | 3.43128000  | 3.75832400  |
| H  | -5.22005200 | 1.87998300  | 3.57846400  |
| H  | -4.61349900 | 2.37824300  | 5.19487100  |
| C  | 0.81572200  | 5.73785600  | -0.71597900 |
| C  | 0.79713700  | 5.95482200  | 0.81020200  |
| H  | 0.20452500  | 6.50972400  | -1.19809800 |
| H  | 1.83808100  | 5.88270900  | -1.09061800 |
| H  | 1.17518700  | 6.95016000  | 1.07096300  |
| H  | -0.22184700 | 5.85928000  | 1.20053900  |
| H  | 1.41510500  | 5.20719900  | 1.31959000  |
| C  | -2.14041900 | 4.90598400  | -1.75136000 |
| C  | -3.05512600 | 4.88772400  | -0.50869400 |
| H  | -2.71071600 | 4.57914300  | -2.63087100 |
| H  | -1.82780300 | 5.93604100  | -1.96084800 |
| H  | -3.96374200 | 5.47647700  | -0.68221000 |
| H  | -3.34306200 | 3.86731300  | -0.23588500 |
| H  | -2.53262400 | 5.31181600  | 0.35602800  |
| C  | -4.49261800 | 0.28408500  | -3.21278100 |
| C  | -5.40468600 | 0.66756300  | -2.02961900 |
| H  | -5.02423700 | -0.41827800 | -3.86563500 |
| H  | -4.29599600 | 1.17532900  | -3.82300000 |
| H  | -6.31902100 | 1.15742900  | -2.38378800 |
| H  | -5.69082900 | -0.22246800 | -1.45955600 |
| H  | -4.89339300 | 1.34620900  | -1.33832600 |



|   |             |             |             |
|---|-------------|-------------|-------------|
| C | -3.63912900 | -2.84776700 | -3.14444500 |
| C | -4.36796800 | -3.57703100 | -2.00016600 |
| H | -2.97126200 | -3.55590500 | -3.65235900 |
| H | -4.37587000 | -2.53958900 | -3.89556900 |
| H | -4.86846200 | -4.47995400 | -2.36854300 |
| H | -3.66860700 | -3.87233900 | -1.20996000 |
| H | -5.12679800 | -2.93021500 | -1.54746500 |
| C | 0.59482800  | -5.56674100 | -1.15609200 |
| C | -0.32135100 | -5.90653600 | 0.03579100  |
| H | 1.39445500  | -6.31371300 | -1.22061300 |
| H | 0.02254500  | -5.65536200 | -2.08913100 |
| H | -0.75011700 | -6.90994600 | -0.06740800 |
| H | 0.23977700  | -5.86835300 | 0.97640800  |
| H | -1.14451400 | -5.18812400 | 0.11372000  |
| C | 3.54510800  | -4.73401900 | -0.11722500 |
| C | 3.61270200  | -4.78170500 | 1.42213500  |
| H | 4.51182100  | -4.39487800 | -0.51256900 |
| H | 3.40038800  | -5.74940900 | -0.50402200 |
| H | 4.42799100  | -5.43048000 | 1.76234000  |
| H | 3.77382700  | -3.78044800 | 1.83702200  |
| H | 2.67300000  | -5.16329100 | 1.83720600  |
| C | 6.14661200  | -0.08080900 | 0.68635700  |
| C | 6.04767900  | -0.57569200 | 2.14296700  |
| H | 6.95339700  | 0.65758000  | 0.61074900  |
| H | 6.44030200  | -0.91695400 | 0.03785200  |
| H | 6.99337000  | -1.01984300 | 2.47459400  |
| H | 5.80143300  | 0.25324000  | 2.81571900  |
| H | 5.25911800  | -1.32952800 | 2.24734000  |
| C | 5.31433800  | 3.04741700  | 0.53593200  |
| C | 4.94157100  | 3.56586900  | 1.93901500  |
| H | 5.17739500  | 3.85335200  | -0.19718200 |
| H | 6.38179000  | 2.79830200  | 0.51504100  |
| H | 5.53736300  | 4.44673100  | 2.20475800  |
| H | 3.88185800  | 3.83993200  | 1.98662900  |
| H | 5.11499400  | 2.79171700  | 2.69469300  |
| C | -1.75405200 | -2.96383000 | 3.99157800  |
| C | -2.79548200 | -2.00003100 | 4.34742900  |
| C | -3.58713200 | -1.46747400 | 3.24632000  |
| C | -3.22001200 | -1.60597300 | 1.94670500  |
| C | -2.01347000 | -2.42198100 | 1.56746400  |
| C | -1.36458800 | -3.13877300 | 2.71124100  |
| H | -4.44917800 | -0.85142300 | 3.49279100  |
| H | -2.27872500 | -3.13190100 | 0.76469700  |
| H | -1.27524600 | -1.75930800 | 1.07859900  |

|   |             |             |            |
|---|-------------|-------------|------------|
| C | -3.93982900 | -0.93099200 | 0.82174900 |
| H | -4.27313100 | -1.65766000 | 0.07259400 |
| H | -4.80010000 | -0.35070800 | 1.16645600 |
| H | -3.26178500 | -0.24058800 | 0.30246800 |
| H | -2.06472700 | -0.92883700 | 4.66783200 |
| H | -3.31950500 | -2.16904900 | 5.29135500 |
| H | -1.24324800 | -3.48740100 | 4.79627800 |
| H | -0.54629600 | -3.81325300 | 2.46942100 |

**<sup>3</sup>TS1**

|   |             |             |             |
|---|-------------|-------------|-------------|
| N | 2.71025600  | 0.54121500  | -0.52863700 |
| N | 0.36598000  | 2.08913600  | -1.34911700 |
| N | -1.04022700 | -0.37692700 | -1.91923000 |
| N | 1.25234400  | -1.90998300 | -1.07347400 |
| C | 3.69866700  | -0.34589000 | -0.20779500 |
| C | 4.87629500  | 0.37635700  | 0.24479400  |
| C | 4.56482600  | 1.71052900  | 0.18588500  |
| C | 3.19867100  | 1.80004700  | -0.30543100 |
| C | 2.48931100  | 2.98236600  | -0.50566500 |
| C | 1.18193000  | 3.12093800  | -0.96183100 |
| C | 0.46283200  | 4.38049900  | -1.08207000 |
| C | -0.79065800 | 4.07726200  | -1.54491000 |
| C | -0.83100800 | 2.63444700  | -1.72040900 |
| C | -1.92965500 | 1.90305500  | -2.16813600 |
| C | -2.02757400 | 0.52168100  | -2.27450300 |
| C | -3.18190300 | -0.19904700 | -2.77837900 |
| C | -2.87064400 | -1.53437700 | -2.73409000 |
| C | -1.53653600 | -1.63757800 | -2.17113900 |
| C | -0.86663700 | -2.82406100 | -1.89753300 |
| C | 0.41275800  | -2.95682800 | -1.36846100 |
| C | 1.07688800  | -4.21478200 | -1.07468200 |
| C | 2.33296000  | -3.90460600 | -0.62146900 |
| C | 2.44057300  | -2.45643800 | -0.63516700 |
| C | 3.56871800  | -1.73354200 | -0.26501800 |
| H | -2.80948100 | 2.47256900  | -2.44375900 |
| H | 3.01263300  | 3.90146200  | -0.26648500 |
| H | 4.43590200  | -2.31217500 | 0.03293000  |
| H | -1.39848400 | -3.74305100 | -2.11736800 |
| C | 1.78208500  | 0.33622100  | -3.16336200 |
| H | 2.27118400  | 1.31026000  | -3.19006700 |
| H | 2.49944100  | -0.48093100 | -3.26618100 |
| H | 0.97062600  | 0.27168500  | -3.89349200 |
| C | 0.24496800  | 0.26238500  | 0.82575400  |
| C | 0.95178300  | -0.37886200 | 1.86029500  |

|    |             |             |             |
|----|-------------|-------------|-------------|
| C  | -0.92631900 | 0.94912000  | 1.15811200  |
| C  | 0.44809700  | -0.39435100 | 3.15055500  |
| H  | 1.87577300  | -0.90550300 | 1.64755900  |
| C  | -1.45608000 | 0.95752500  | 2.45361400  |
| H  | -1.49261200 | 1.47518200  | 0.40193000  |
| C  | -0.77351100 | 0.24687000  | 3.49462200  |
| O  | -1.24074000 | 0.10629200  | 4.71589800  |
| Ir | 0.80449200  | 0.07558200  | -1.20289900 |
| H  | 0.95800200  | -0.92580900 | 3.94869600  |
| C  | -2.74395600 | 1.68798600  | 2.60660300  |
| O  | -3.37569500 | 2.15484400  | 1.66749600  |
| O  | -3.17761700 | 1.80126000  | 3.87850200  |
| C  | -4.42450700 | 2.48855700  | 4.03190300  |
| H  | -4.36197400 | 3.50668300  | 3.63593100  |
| H  | -5.22624300 | 1.96023500  | 3.50529000  |
| H  | -4.61675200 | 2.50388600  | 5.10561300  |
| C  | 1.00403000  | 5.71711400  | -0.66487600 |
| C  | 0.98409900  | 5.91364500  | 0.86411100  |
| H  | 0.41801700  | 6.51309900  | -1.13901500 |
| H  | 2.03202300  | 5.83735800  | -1.03286000 |
| H  | 1.38975300  | 6.89389500  | 1.14002700  |
| H  | -0.03907500 | 5.84267900  | 1.24844700  |
| H  | 1.57708300  | 5.14151300  | 1.36652500  |
| C  | -1.97318300 | 4.98515600  | -1.71513900 |
| C  | -2.88448800 | 4.97938500  | -0.46962200 |
| H  | -2.55519200 | 4.68459200  | -2.59632700 |
| H  | -1.63176400 | 6.00810300  | -1.91433900 |
| H  | -3.77773600 | 5.59332800  | -0.63536200 |
| H  | -3.19872100 | 3.96461300  | -0.20459900 |
| H  | -2.34852300 | 5.38296700  | 0.39668900  |
| C  | -4.46875300 | 0.44967300  | -3.19850400 |
| C  | -5.35452600 | 0.83474300  | -1.99568400 |
| H  | -5.02635800 | -0.22738500 | -3.85643500 |
| H  | -4.25657300 | 1.34619800  | -3.79562600 |
| H  | -6.25752600 | 1.35980800  | -2.32780000 |
| H  | -5.66092700 | -0.05897100 | -1.44227700 |
| H  | -4.81475500 | 1.48087400  | -1.29494000 |
| C  | -3.70028100 | -2.70428300 | -3.18364300 |
| C  | -4.46186700 | -3.41207100 | -2.04779100 |
| H  | -3.05251000 | -3.43220800 | -3.68955100 |
| H  | -4.42034300 | -2.36860300 | -3.93923900 |
| H  | -4.98668400 | -4.29846400 | -2.42232200 |
| H  | -3.77973900 | -3.72925000 | -1.25107700 |
| H  | -5.20381100 | -2.74163100 | -1.60218900 |

|   |             |             |             |
|---|-------------|-------------|-------------|
| C | 0.43421200  | -5.56625100 | -1.19136400 |
| C | -0.50525900 | -5.87842000 | -0.01012100 |
| H | 1.20926300  | -6.33916000 | -1.24994100 |
| H | -0.13080800 | -5.63315800 | -2.13066200 |
| H | -0.96705900 | -6.86612800 | -0.12164700 |
| H | 0.04697900  | -5.86268600 | 0.93627700  |
| H | -1.30397800 | -5.13243400 | 0.06237500  |
| C | 3.39634300  | -4.83319600 | -0.11128200 |
| C | 3.44022300  | -4.88617200 | 1.42880400  |
| H | 4.37929000  | -4.52533600 | -0.49203400 |
| H | 3.22379700  | -5.84248200 | -0.50261900 |
| H | 4.22876000  | -5.56225900 | 1.77868600  |
| H | 3.62824400  | -3.89178400 | 1.84882100  |
| H | 2.48268500  | -5.23735100 | 1.82954600  |
| C | 6.13149700  | -0.27031800 | 0.75466400  |
| C | 5.99135700  | -0.76818500 | 2.20690100  |
| H | 6.96254400  | 0.44232300  | 0.69669700  |
| H | 6.40978800  | -1.11251600 | 0.10716700  |
| H | 6.91669600  | -1.24331100 | 2.55263800  |
| H | 5.75948300  | 0.06511600  | 2.87927900  |
| H | 5.17776400  | -1.49717000 | 2.29407500  |
| C | 5.39918100  | 2.88348100  | 0.61212200  |
| C | 5.01812300  | 3.40191500  | 2.01303200  |
| H | 5.29956900  | 3.69903400  | -0.11641400 |
| H | 6.45877600  | 2.60206200  | 0.60730400  |
| H | 5.63591400  | 4.26193000  | 2.29616800  |
| H | 3.96661900  | 3.70790000  | 2.04527200  |
| H | 5.15470100  | 2.61688900  | 2.76496700  |
| C | -1.80520000 | -2.91195900 | 4.00261000  |
| C | -2.81678400 | -1.92284900 | 4.38239700  |
| C | -3.64504700 | -1.40162000 | 3.29822300  |
| C | -3.33558700 | -1.57549800 | 1.99012400  |
| C | -2.15893200 | -2.42193300 | 1.57820800  |
| C | -1.47399700 | -3.12401200 | 2.71223400  |
| H | -4.48627500 | -0.76604100 | 3.56616500  |
| H | -2.47641700 | -3.14996100 | 0.81152800  |
| H | -1.43048100 | -1.78645100 | 1.04188100  |
| C | -4.09959100 | -0.92003400 | 0.88025500  |
| H | -4.52067000 | -1.66755000 | 0.19793300  |
| H | -4.90720600 | -0.28395100 | 1.25292900  |
| H | -3.43177500 | -0.28735800 | 0.28173600  |
| H | -2.08412000 | -0.86982300 | 4.67910400  |
| H | -3.31927700 | -2.08639400 | 5.33976800  |
| H | -1.26946200 | -3.42684500 | 4.79680900  |

|             |             |             |             |
|-------------|-------------|-------------|-------------|
| H           | -0.67758800 | -3.81794400 | 2.45263300  |
| <b>6</b>    |             |             |             |
| C           | 0.20760300  | 1.24111800  | 0.00059400  |
| C           | 0.92760200  | 0.07539600  | 0.00055000  |
| C           | 0.22348200  | -1.25996600 | 0.00097000  |
| C           | -1.27646100 | -1.16966300 | -0.00053500 |
| C           | -1.92798200 | 0.03118100  | -0.00052000 |
| C           | -1.21072200 | 1.25553700  | 0.00031700  |
| H           | 0.56964000  | -1.85878100 | -0.86537600 |
| H           | 0.74220800  | 2.18971600  | 0.00011200  |
| H           | -1.83588000 | -2.10199400 | -0.00177400 |
| H           | -3.01564200 | 0.05378600  | -0.00152400 |
| H           | -1.74332700 | 2.20127100  | -0.00034200 |
| H           | 0.56775400  | -1.85648200 | 0.86977500  |
| C           | 2.42762600  | 0.04398400  | -0.00087300 |
| H           | 2.81402500  | -0.49035300 | -0.88204400 |
| H           | 2.85881300  | 1.05055500  | 0.00033200  |
| H           | 2.81551800  | -0.49323700 | 0.87782800  |
| <b>INT1</b> |             |             |             |
| N           | 1.00942700  | -1.26945500 | -1.39279000 |
| N           | 0.78792600  | 1.62464800  | -1.26695300 |
| N           | -2.00010900 | 1.39339300  | -0.55861600 |
| N           | -1.81956100 | -1.49200500 | -0.67124600 |
| C           | 0.91171500  | -2.63345400 | -1.33770500 |
| C           | 2.21332100  | -3.22463300 | -1.60590700 |
| C           | 3.08125200  | -2.18546600 | -1.82242600 |
| C           | 2.30523700  | -0.96312100 | -1.69503600 |
| C           | 2.81091100  | 0.33238000  | -1.80327700 |
| C           | 2.12596400  | 1.52063300  | -1.58313900 |
| C           | 2.72527900  | 2.84387700  | -1.60362300 |
| C           | 1.72662800  | 3.73671500  | -1.31739600 |
| C           | 0.51579400  | 2.96046000  | -1.10832000 |
| C           | -0.72967300 | 3.48249900  | -0.77715600 |
| C           | -1.89316700 | 2.76607700  | -0.52198400 |
| C           | -3.17487300 | 3.34531100  | -0.16737200 |
| C           | -4.05099000 | 2.30391700  | 0.00431400  |
| C           | -3.30966900 | 1.08262200  | -0.24322900 |
| C           | -3.83202100 | -0.20158400 | -0.16244800 |
| C           | -3.14464100 | -1.40022500 | -0.34988700 |
| C           | -3.70884400 | -2.73206800 | -0.20455400 |
| C           | -2.69144400 | -3.61768000 | -0.44892000 |
| C           | -1.50790300 | -2.82570400 | -0.74566500 |

|    |             |             |             |
|----|-------------|-------------|-------------|
| C  | -0.25285000 | -3.34256700 | -1.05412300 |
| H  | -0.79920500 | 4.56192100  | -0.70392800 |
| H  | 3.86677200  | 0.41995500  | -2.03142000 |
| H  | -0.17052400 | -4.42374500 | -1.06895800 |
| H  | -4.88363100 | -0.28075800 | 0.08939700  |
| C  | -0.93182200 | -0.21175000 | -3.09341700 |
| H  | -0.09308400 | 0.21322400  | -3.64933300 |
| H  | -1.05034500 | -1.27550200 | -3.30254800 |
| H  | -1.86252700 | 0.33528900  | -3.27228100 |
| C  | 0.11902000  | -0.20686600 | 1.04201100  |
| C  | -0.79517700 | -0.46508400 | 2.08135400  |
| C  | 1.46038200  | -0.10307800 | 1.38704700  |
| C  | -0.37726000 | -0.56475200 | 3.40483400  |
| H  | -1.85326800 | -0.57130600 | 1.86192800  |
| C  | 1.91835400  | -0.20063300 | 2.71569200  |
| H  | 2.21878500  | 0.07289900  | 0.63774200  |
| C  | 0.97637100  | -0.43736700 | 3.74777800  |
| O  | 1.28672700  | -0.55609900 | 5.06254800  |
| Ir | -0.50937700 | 0.08138700  | -0.95602000 |
| H  | -1.08732600 | -0.74497600 | 4.20672600  |
| C  | 3.37344800  | -0.05031500 | 2.90558200  |
| O  | 4.19715500  | 0.14916200  | 2.03146400  |
| O  | 3.76264800  | -0.15910600 | 4.22128400  |
| C  | 5.17263600  | -0.02396900 | 4.46429900  |
| H  | 5.72707200  | -0.79840000 | 3.92776000  |
| H  | 5.52327700  | 0.95734300  | 4.13410100  |
| H  | 5.29692600  | -0.13617600 | 5.54198900  |
| C  | 4.19370600  | 3.10494800  | -1.77026100 |
| C  | 4.96855700  | 2.88239700  | -0.45417700 |
| H  | 4.35225800  | 4.13286600  | -2.11763300 |
| H  | 4.60639900  | 2.45460300  | -2.55252000 |
| H  | 6.04639700  | 3.01397400  | -0.60614600 |
| H  | 4.64056000  | 3.59945700  | 0.30684100  |
| H  | 4.79185900  | 1.87987800  | -0.04996000 |
| C  | 1.82624700  | 5.22457900  | -1.14494900 |
| C  | 1.88509200  | 5.64882700  | 0.33592600  |
| H  | 0.97084700  | 5.71530800  | -1.62869800 |
| H  | 2.71929500  | 5.59456500  | -1.66203600 |
| H  | 1.94730400  | 6.73914400  | 0.43102100  |
| H  | 0.99635000  | 5.30610200  | 0.87720800  |
| H  | 2.75950600  | 5.20923400  | 0.82802700  |
| C  | -3.42021100 | 4.81227300  | 0.03607500  |
| C  | -2.91601700 | 5.31175700  | 1.40452900  |
| H  | -4.49257800 | 5.02220000  | -0.05185100 |

|   |             |             |             |
|---|-------------|-------------|-------------|
| H | -2.93274500 | 5.38723400  | -0.76237100 |
| H | -3.09685800 | 6.38641700  | 1.52248100  |
| H | -3.42592100 | 4.78515400  | 2.21885000  |
| H | -1.84160200 | 5.12897200  | 1.51623700  |
| C | -5.48578700 | 2.35651500  | 0.44323300  |
| C | -5.65641200 | 2.05043300  | 1.94436800  |
| H | -6.08345400 | 1.64554800  | -0.14257900 |
| H | -5.90036200 | 3.34828800  | 0.22825500  |
| H | -6.71238900 | 2.08462000  | 2.23631500  |
| H | -5.26420700 | 1.05678700  | 2.18799800  |
| H | -5.10734000 | 2.77901200  | 2.55107400  |
| C | -5.11954600 | -3.01956800 | 0.22057400  |
| C | -5.32305100 | -2.85704600 | 1.73988900  |
| H | -5.39208900 | -4.04025300 | -0.07243100 |
| H | -5.81465600 | -2.35636400 | -0.31154000 |
| H | -6.36133100 | -3.06373200 | 2.02430800  |
| H | -4.67119700 | -3.54382000 | 2.29115400  |
| H | -5.07535100 | -1.83890800 | 2.06079500  |
| C | -2.71770200 | -5.11610400 | -0.36045800 |
| C | -2.13546700 | -5.64052500 | 0.96704300  |
| H | -2.15811600 | -5.55130700 | -1.19911100 |
| H | -3.74872600 | -5.47302900 | -0.46814600 |
| H | -2.15636700 | -6.73598900 | 1.00131800  |
| H | -1.09851400 | -5.31149000 | 1.09676100  |
| H | -2.71036200 | -5.25818900 | 1.81783600  |
| C | 2.51462900  | -4.69415000 | -1.54734200 |
| C | 2.63666700  | -5.21824200 | -0.10269000 |
| H | 3.44779400  | -4.89835300 | -2.08537000 |
| H | 1.73230700  | -5.25885100 | -2.07236700 |
| H | 2.84902500  | -6.29366500 | -0.09028500 |
| H | 3.44346200  | -4.70102700 | 0.42792400  |
| H | 1.71106400  | -5.04328300 | 0.45674400  |
| C | 4.56933800  | -2.23138500 | -2.01126500 |
| C | 5.32364900  | -2.04318600 | -0.67828000 |
| H | 4.88326200  | -1.45569000 | -2.72184400 |
| H | 4.85844800  | -3.18830200 | -2.46239900 |
| H | 6.40766500  | -2.01448700 | -0.84094700 |
| H | 5.02021000  | -1.12006600 | -0.17322500 |
| H | 5.10236600  | -2.87111700 | 0.00475500  |
| H | 2.25283800  | -0.44988400 | 5.15555100  |

**ossTS2**

|   |             |            |             |
|---|-------------|------------|-------------|
| N | 1.44947700  | 2.06938800 | -0.90735600 |
| N | -1.11864400 | 0.92135700 | -1.70426500 |

|    |             |             |             |
|----|-------------|-------------|-------------|
| N  | 0.00356100  | -1.73703600 | -1.40576200 |
| N  | 2.53660900  | -0.59414500 | -0.60508600 |
| C  | 2.69625800  | 2.41639100  | -0.45766000 |
| C  | 2.79164600  | 3.86409500  | -0.35178900 |
| C  | 1.58017200  | 4.36807400  | -0.74873200 |
| C  | 0.74433300  | 3.22910600  | -1.09423500 |
| C  | -0.59949900 | 3.30210200  | -1.45268800 |
| C  | -1.47048600 | 2.24306100  | -1.69077000 |
| C  | -2.90270800 | 2.36851000  | -1.91708000 |
| C  | -3.38731800 | 1.09881800  | -2.09016200 |
| C  | -2.25323200 | 0.19840200  | -1.94775200 |
| C  | -2.31708100 | -1.19230100 | -1.99810800 |
| C  | -1.27649600 | -2.08647200 | -1.77127100 |
| C  | -1.36559300 | -3.52991500 | -1.91980200 |
| C  | -0.10839100 | -4.03027800 | -1.70043800 |
| C  | 0.74171200  | -2.89618000 | -1.37360400 |
| C  | 2.08581400  | -2.97169100 | -1.02267800 |
| C  | 2.90602900  | -1.91908400 | -0.62622900 |
| C  | 4.27524200  | -2.05138800 | -0.15950800 |
| C  | 4.72568500  | -0.78567000 | 0.11518800  |
| C  | 3.63688200  | 0.12531400  | -0.19481100 |
| C  | 3.70077400  | 1.51295000  | -0.12060800 |
| H  | -3.28302500 | -1.62369100 | -2.23537600 |
| H  | -1.02725400 | 4.29667500  | -1.51087800 |
| H  | 4.63988800  | 1.93675000  | 0.21810300  |
| H  | 2.53285100  | -3.95977000 | -1.02296100 |
| C  | 1.26260700  | 0.27954500  | -3.17148000 |
| H  | 1.05240600  | 1.28819800  | -3.53793500 |
| H  | 2.33304600  | 0.06241100  | -3.25783000 |
| H  | 0.67728200  | -0.45363300 | -3.73574500 |
| C  | -0.34108200 | 0.57438900  | 0.88894700  |
| C  | -0.16801900 | 1.79696500  | 1.56284700  |
| C  | -1.53043900 | -0.10134900 | 1.11825500  |
| C  | -1.17821900 | 2.35801900  | 2.34099500  |
| H  | 0.76523800  | 2.34367100  | 1.46901800  |
| C  | -2.58723700 | 0.44447000  | 1.87950900  |
| H  | -1.70078400 | -1.07836900 | 0.68122800  |
| C  | -2.41487900 | 1.71901600  | 2.47829700  |
| O  | -3.36716300 | 2.36612000  | 3.20292900  |
| Ir | 0.71200200  | 0.16113900  | -1.11417700 |
| H  | -1.04223800 | 3.31664600  | 2.83408700  |
| C  | -3.80046600 | -0.37519200 | 1.99235200  |
| O  | -3.90346000 | -1.55529300 | 1.69657800  |
| O  | -4.88687900 | 0.31550700  | 2.47935100  |



|   |             |             |             |
|---|-------------|-------------|-------------|
| C | -6.10055400 | -0.44408200 | 2.60985800  |
| H | -6.43162900 | -0.79386800 | 1.62913700  |
| H | -5.94530200 | -1.30554400 | 3.26462000  |
| H | -6.83053200 | 0.24288200  | 3.03948700  |
| C | -3.67140200 | 3.65089400  | -1.79186800 |
| C | -3.88616200 | 4.03916000  | -0.31354700 |
| H | -4.64416300 | 3.55364600  | -2.28844800 |
| H | -3.14603600 | 4.46500800  | -2.30903000 |
| H | -4.43876000 | 4.98219500  | -0.22739500 |
| H | -4.44573900 | 3.25968700  | 0.21543200  |
| H | -2.92766200 | 4.14826100  | 0.20494600  |
| C | -4.81125400 | 0.66322500  | -2.28268600 |
| C | -5.46422900 | 0.16061500  | -0.98002100 |
| H | -4.86133600 | -0.13069300 | -3.04015200 |
| H | -5.39835900 | 1.49866700  | -2.68195600 |
| H | -6.50830500 | -0.12926400 | -1.15116900 |
| H | -4.92776200 | -0.70481100 | -0.57907000 |
| H | -5.44420600 | 0.94189100  | -0.21204900 |
| C | -2.64006700 | -4.27561900 | -2.18744700 |
| C | -3.51116900 | -4.40885100 | -0.92101500 |
| H | -2.41229300 | -5.27452700 | -2.57829400 |
| H | -3.21528800 | -3.76659800 | -2.97210300 |
| H | -4.46255100 | -4.90439200 | -1.14794200 |
| H | -2.99081500 | -4.99996900 | -0.15929400 |
| H | -3.72512300 | -3.42921400 | -0.47961500 |
| C | 0.35411400  | -5.45901200 | -1.75202000 |
| C | 0.43514600  | -6.13574400 | -0.37061600 |
| H | 1.33990300  | -5.50634200 | -2.23331300 |
| H | -0.32076200 | -6.03817400 | -2.39342400 |
| H | 0.83656600  | -7.15262000 | -0.45278900 |
| H | 1.08077400  | -5.56811500 | 0.30937300  |
| H | -0.55759500 | -6.19949100 | 0.08789500  |
| C | 4.97289600  | -3.36144800 | 0.06391400  |
| C | 4.51356000  | -4.05357100 | 1.36278100  |
| H | 6.05691500  | -3.20282300 | 0.10310400  |
| H | 4.79581600  | -4.03289500 | -0.78692100 |
| H | 5.02160600  | -5.01506900 | 1.50134100  |
| H | 4.72868100  | -3.42177400 | 2.23199600  |
| H | 3.43277900  | -4.23403500 | 1.34806400  |
| C | 6.04475600  | -0.36995200 | 0.69870400  |
| C | 5.94663600  | -0.05000700 | 2.20340500  |
| H | 6.43115700  | 0.50934300  | 0.16617000  |
| H | 6.78399300  | -1.16493400 | 0.54608700  |
| H | 6.91757400  | 0.25939200  | 2.60749200  |

|   |             |             |             |
|---|-------------|-------------|-------------|
| H | 5.22685300  | 0.75641000  | 2.38379400  |
| H | 5.60547100  | -0.92891900 | 2.76231100  |
| C | 3.98336000  | 4.60535200  | 0.18141400  |
| C | 4.06924900  | 4.56119000  | 1.71994300  |
| H | 3.94442900  | 5.65071200  | -0.14697500 |
| H | 4.90592500  | 4.18822900  | -0.24422800 |
| H | 4.95312900  | 5.09848200  | 2.08333400  |
| H | 3.18016100  | 5.01841700  | 2.16857600  |
| H | 4.12451600  | 3.52698800  | 2.07803800  |
| C | 1.11138300  | 5.79398600  | -0.72902400 |
| C | 0.30046600  | 6.12237800  | 0.54115300  |
| H | 0.49802800  | 6.00124600  | -1.61562700 |
| H | 1.97296800  | 6.46934100  | -0.79205700 |
| H | -0.05688700 | 7.15870000  | 0.52690400  |
| H | -0.56648200 | 5.45892700  | 0.63415600  |
| H | 0.91707100  | 5.98367500  | 1.43644200  |
| C | 0.88871900  | -0.44629900 | 3.57483300  |
| C | 1.24322900  | -1.18088500 | 2.40490000  |
| C | 0.53901400  | -2.35906500 | 2.05982800  |
| C | -0.57327000 | -2.75663600 | 2.74855200  |
| C | -1.02923300 | -1.99181200 | 3.95594300  |
| C | -0.18674300 | -0.81118900 | 4.31843000  |
| H | 0.84607700  | -2.90579900 | 1.17749700  |
| H | -2.07053900 | -1.66650900 | 3.78842300  |
| H | -1.10786600 | -2.68010400 | 4.81871400  |
| C | -1.42438800 | -3.90896400 | 2.31407400  |
| H | -2.43029300 | -3.54535000 | 2.06565000  |
| H | -1.01139400 | -4.39881300 | 1.42956000  |
| H | -1.53504200 | -4.65589800 | 3.11348800  |
| H | -4.18901900 | 1.84317400  | 3.15500100  |
| H | 2.10568400  | -0.88451100 | 1.82401000  |
| H | -0.47721600 | -0.23564300 | 5.19335000  |
| H | 1.46391300  | 0.43695600  | 3.83496500  |

**<sup>3</sup>TS2**

|   |             |             |             |
|---|-------------|-------------|-------------|
| N | 1.14461900  | 2.17372300  | -0.93270100 |
| N | -1.28691400 | 0.65427200  | -1.53475000 |
| N | 0.23749100  | -1.81460400 | -1.31102100 |
| N | 2.60103300  | -0.30408000 | -0.65535500 |
| C | 2.35052800  | 2.70853000  | -0.57812500 |
| C | 2.24080700  | 4.15527200  | -0.49467700 |
| C | 0.94235700  | 4.46878000  | -0.80581500 |
| C | 0.26021300  | 3.21491200  | -1.07959800 |
| C | -1.09458800 | 3.08934900  | -1.37216500 |

|    |             |             |             |
|----|-------------|-------------|-------------|
| C  | -1.81713900 | 1.91335900  | -1.56019600 |
| C  | -3.24089700 | 1.83380100  | -1.84591300 |
| C  | -3.53088300 | 0.50759800  | -2.04043400 |
| C  | -2.29146400 | -0.22346600 | -1.83534000 |
| C  | -2.14637100 | -1.60685400 | -1.89149500 |
| C  | -0.99119000 | -2.34186800 | -1.64575900 |
| C  | -0.88528900 | -3.78655500 | -1.75972300 |
| C  | 0.43118500  | -4.10772800 | -1.55279300 |
| C  | 1.12403100  | -2.86200500 | -1.27077600 |
| C  | 2.47326100  | -2.74080600 | -0.95381300 |
| C  | 3.14879700  | -1.57087700 | -0.62948200 |
| C  | 4.53472900  | -1.49134000 | -0.21289100 |
| C  | 4.82058900  | -0.16383600 | -0.01524400 |
| C  | 3.61348100  | 0.57923400  | -0.31611100 |
| C  | 3.49164300  | 1.96070700  | -0.28688800 |
| H  | -3.03473800 | -2.17520700 | -2.14210500 |
| H  | -1.65863900 | 4.01294100  | -1.43740900 |
| H  | 4.37942300  | 2.51859800  | -0.01073400 |
| H  | 3.05112900  | -3.65767400 | -0.92759000 |
| C  | 0.89097800  | 0.37639800  | -3.20079700 |
| H  | 0.61568600  | 1.39025000  | -3.49874900 |
| H  | 1.94770600  | 0.18354100  | -3.41673000 |
| H  | 0.24983300  | -0.36046600 | -3.69092900 |
| C  | -0.12869600 | 0.36675500  | 1.03093900  |
| C  | -0.12364400 | 1.73025000  | 1.55932600  |
| C  | -1.42209600 | -0.27855800 | 1.15548400  |
| C  | -1.21655700 | 2.31638900  | 2.13918600  |
| H  | 0.80490000  | 2.29068600  | 1.52773200  |
| C  | -2.53410300 | 0.29358200  | 1.76381100  |
| H  | -1.53178700 | -1.28709800 | 0.78206100  |
| C  | -2.45474800 | 1.63444100  | 2.23886600  |
| O  | -3.48118200 | 2.32208700  | 2.79579700  |
| Ir | 0.68628500  | 0.16753100  | -1.05543900 |
| H  | -1.17090500 | 3.32789500  | 2.53352200  |
| C  | -3.72767900 | -0.56683800 | 1.87869300  |
| O  | -3.77517100 | -1.76250900 | 1.65853800  |
| O  | -4.85130400 | 0.11581500  | 2.29102200  |
| C  | -6.01787500 | -0.69187700 | 2.53012600  |
| H  | -6.34025100 | -1.17581100 | 1.60599900  |
| H  | -5.80116100 | -1.45731000 | 3.27978700  |
| H  | -6.78182400 | -0.00193200 | 2.89025600  |
| C  | -4.18916300 | 2.99456600  | -1.78506200 |
| C  | -4.52688100 | 3.37355000  | -0.32811300 |
| H  | -5.11298200 | 2.74792800  | -2.32153900 |

|   |             |             |             |
|---|-------------|-------------|-------------|
| H | -3.76245400 | 3.86658600  | -2.29853200 |
| H | -5.22781300 | 4.21564800  | -0.29059800 |
| H | -4.97589000 | 2.52399200  | 0.19809600  |
| H | -3.62461600 | 3.64776900  | 0.22747500  |
| C | -4.86151800 | -0.11833800 | -2.34447500 |
| C | -5.57738100 | -0.64926100 | -1.08878100 |
| H | -4.73054600 | -0.93939300 | -3.06153100 |
| H | -5.50401700 | 0.61696600  | -2.84335200 |
| H | -6.54731300 | -1.09130600 | -1.34670200 |
| H | -4.97365100 | -1.40763900 | -0.58114500 |
| H | -5.74755600 | 0.16496000  | -0.37570100 |
| C | -2.05373400 | -4.70406200 | -1.96966900 |
| C | -2.88167400 | -4.88446900 | -0.67993400 |
| H | -1.70040500 | -5.68256100 | -2.31565300 |
| H | -2.70091200 | -4.31543200 | -2.76737700 |
| H | -3.75657700 | -5.51993500 | -0.86072700 |
| H | -2.27354500 | -5.35041800 | 0.10284600  |
| H | -3.22565500 | -3.92033300 | -0.28937600 |
| C | 1.08281700  | -5.46118800 | -1.57550700 |
| C | 1.28050300  | -6.07636500 | -0.17715400 |
| H | 2.05641200  | -5.38847200 | -2.07831000 |
| H | 0.48115600  | -6.14512100 | -2.18569300 |
| H | 1.81392700  | -7.03198000 | -0.24089700 |
| H | 1.85448800  | -5.40570800 | 0.47207700  |
| H | 0.31470800  | -6.25704300 | 0.30608100  |
| C | 5.41073000  | -2.68287600 | 0.04139700  |
| C | 5.09133500  | -3.36092500 | 1.38909700  |
| H | 6.46378000  | -2.37900600 | 0.02826300  |
| H | 5.29596200  | -3.41379700 | -0.77010000 |
| H | 5.72377200  | -4.24214200 | 1.54679800  |
| H | 5.25658400  | -2.66472600 | 2.21874100  |
| H | 4.04266700  | -3.67521300 | 1.43024600  |
| C | 6.09255200  | 0.44948900  | 0.49368500  |
| C | 6.00991500  | 0.81651700  | 1.98864500  |
| H | 6.33484100  | 1.34854300  | -0.08857900 |
| H | 6.92559200  | -0.24544800 | 0.33733500  |
| H | 6.94523300  | 1.27046000  | 2.33577100  |
| H | 5.19450600  | 1.52493700  | 2.17240500  |
| H | 5.81378800  | -0.07536900 | 2.59401300  |
| C | 3.34572900  | 5.07164300  | -0.05530700 |
| C | 3.53105500  | 5.08237000  | 1.47510000  |
| H | 3.13823600  | 6.09131100  | -0.40049300 |
| H | 4.28973500  | 4.77666400  | -0.53273100 |
| H | 4.34923400  | 5.74961500  | 1.77002100  |

|   |             |             |             |
|---|-------------|-------------|-------------|
| H | 2.61487200  | 5.42099900  | 1.97160900  |
| H | 3.75612800  | 4.07717100  | 1.84901000  |
| C | 0.27376800  | 5.81226500  | -0.77033200 |
| C | -0.50665400 | 6.04094400  | 0.53998300  |
| H | -0.40988400 | 5.91534600  | -1.62323800 |
| H | 1.02454200  | 6.60269000  | -0.88692700 |
| H | -1.00535900 | 7.01704800  | 0.53835900  |
| H | -1.26592700 | 5.26453800  | 0.68379800  |
| H | 0.16958500  | 6.00191000  | 1.40145600  |
| C | 0.75078700  | -0.13311300 | 3.58307300  |
| C | 1.06585200  | -0.68273300 | 2.25821600  |
| C | 0.68468100  | -2.08459000 | 2.07727100  |
| C | -0.22400300 | -2.70403600 | 2.85829400  |
| C | -0.80422100 | -2.02383000 | 4.07529300  |
| C | -0.13144900 | -0.72052300 | 4.40950800  |
| H | 1.07382000  | -2.60174800 | 1.20878100  |
| H | -1.88648600 | -1.86677300 | 3.91669800  |
| H | -0.75427300 | -2.70928000 | 4.94056900  |
| C | -0.75799000 | -4.07427600 | 2.55161600  |
| H | -1.84173000 | -4.02319600 | 2.37191400  |
| H | -0.29136000 | -4.49554800 | 1.65697300  |
| H | -0.60477600 | -4.77252300 | 3.38784700  |
| H | -4.27250200 | 1.74934400  | 2.77740500  |
| H | 2.02868700  | -0.39267300 | 1.84594600  |
| H | -0.38145400 | -0.25909200 | 5.36309200  |
| H | 1.20311700  | 0.81576800  | 3.86178100  |

### 3a

|   |             |             |             |
|---|-------------|-------------|-------------|
| C | -0.52397200 | 0.14465400  | -0.20595100 |
| C | -0.56438800 | -1.26152900 | -0.27003600 |
| C | 0.71510700  | 0.75267800  | -0.08149300 |
| C | 0.59285600  | -2.01904000 | -0.21147700 |
| H | -1.52814500 | -1.75445900 | -0.36731700 |
| C | 1.91385300  | 0.01117500  | -0.01860300 |
| H | 0.79701600  | 1.83434200  | -0.02774300 |
| C | 1.84934800  | -1.40146900 | -0.08515800 |
| O | 2.92001700  | -2.22583700 | -0.03605700 |
| H | 0.56497500  | -3.10287600 | -0.26084200 |
| C | 3.16092500  | 0.79469100  | 0.11483100  |
| O | 3.23633000  | 2.00456400  | 0.17393800  |
| O | 4.28841000  | 0.00914500  | 0.16977600  |
| C | 5.53341400  | 0.71861500  | 0.30010500  |
| H | 5.68003900  | 1.38628400  | -0.55262500 |
| H | 5.53897100  | 1.30818100  | 1.22033400  |

|   |             |             |             |
|---|-------------|-------------|-------------|
| H | 6.30664400  | -0.04971900 | 0.32778000  |
| C | -2.51495300 | 0.73958400  | -1.59722000 |
| C | -1.81951700 | 0.95447400  | -0.27224100 |
| C | -2.71552700 | 0.62433700  | 0.90047800  |
| C | -3.96308200 | 0.15048900  | 0.80387000  |
| C | -4.62726700 | -0.07728500 | -0.53455500 |
| C | -3.75799200 | 0.26892000  | -1.71249100 |
| H | -2.27179500 | 0.77214500  | 1.88437300  |
| H | -4.95634100 | -1.12800400 | -0.60712000 |
| H | -4.19300000 | 0.12546000  | -2.70044400 |
| H | -1.52975200 | 2.01582200  | -0.20129000 |
| H | -1.93065700 | 0.97086500  | -2.48592200 |
| H | -5.56477700 | 0.50310800  | -0.57985000 |
| C | -4.79741200 | -0.18148500 | 2.01323000  |
| H | -5.10102500 | -1.23798400 | 2.00455600  |
| H | -4.25837500 | 0.00948900  | 2.94677700  |
| H | -5.72453100 | 0.40897000  | 2.02687200  |
| H | 3.72433500  | -1.67745400 | 0.05144200  |

### **<sup>2</sup>TS3**

|   |             |             |             |
|---|-------------|-------------|-------------|
| N | 1.45168500  | -0.18174100 | -1.18525800 |
| N | -0.38424500 | 2.00385500  | -0.74515600 |
| N | -2.56980100 | 0.12032200  | -0.47137000 |
| N | -0.71894700 | -2.07093600 | -0.84583000 |
| C | 2.17241000  | -1.34496200 | -1.31512900 |
| C | 3.56406000  | -1.02978500 | -1.58262400 |
| C | 3.65895900  | 0.33679100  | -1.64016400 |
| C | 2.33368000  | 0.85948600  | -1.35810200 |
| C | 2.01604200  | 2.20412800  | -1.20564700 |
| C | 0.77448000  | 2.73204500  | -0.87253400 |
| C | 0.50631900  | 4.13410400  | -0.59882700 |
| C | -0.83312600 | 4.23443400  | -0.32929600 |
| C | -1.38480600 | 2.89357300  | -0.43579800 |
| C | -2.72103700 | 2.55786300  | -0.24542800 |
| C | -3.27490100 | 1.28222600  | -0.26334200 |
| C | -4.67123500 | 0.96874400  | -0.01145300 |
| C | -4.78838500 | -0.39577000 | -0.07078900 |
| C | -3.46311400 | -0.91925000 | -0.35605500 |
| C | -3.13017000 | -2.26757500 | -0.43584200 |
| C | -1.86052400 | -2.80476800 | -0.62450400 |
| C | -1.53000900 | -4.21919100 | -0.56883900 |
| C | -0.17675400 | -4.31711800 | -0.76389500 |
| C | 0.32000200  | -2.96544600 | -0.95435100 |

|    |             |             |             |
|----|-------------|-------------|-------------|
| C  | 1.64580100  | -2.62535000 | -1.19457800 |
| H  | -3.40078600 | 3.37764200  | -0.04117300 |
| H  | 2.83105000  | 2.91119300  | -1.31278500 |
| H  | 2.34787300  | -3.44700800 | -1.27941000 |
| H  | -3.94053900 | -2.97567000 | -0.30214600 |
| C  | -0.88770100 | 0.09160400  | -2.90574700 |
| H  | -0.11483100 | 0.72958000  | -3.34614100 |
| H  | -0.83524600 | -0.91433800 | -3.33440200 |
| H  | -1.87705300 | 0.52559800  | -3.08205900 |
| C  | -0.29556400 | 1.17494000  | 2.35030300  |
| C  | -0.72714100 | -0.13457000 | 2.20299500  |
| C  | 1.01245700  | 1.56526200  | 2.34945000  |
| C  | 0.25276800  | -1.12414300 | 2.08044100  |
| H  | -1.77915200 | -0.39982700 | 2.17078000  |
| C  | 2.01201100  | 0.56454300  | 2.23560100  |
| H  | 1.32325400  | 2.60134900  | 2.43282800  |
| C  | 1.61914800  | -0.79182700 | 2.10568200  |
| O  | 2.48023000  | -1.83052700 | 1.99273200  |
| Ir | -0.56636800 | -0.03054700 | -0.87615500 |
| H  | -0.01717000 | -2.16550400 | 1.94242700  |
| C  | 3.41047300  | 1.03679300  | 2.31001000  |
| O  | 3.76071200  | 2.19925300  | 2.36566400  |
| O  | 4.32304000  | 0.01218200  | 2.36145500  |
| C  | 5.67315000  | 0.37793500  | 2.70339600  |
| H  | 6.02464300  | 1.19435900  | 2.07371900  |
| H  | 5.71540000  | 0.68388200  | 3.75283100  |
| H  | 6.26875000  | -0.52126000 | 2.54331700  |
| C  | 1.55744800  | 5.20316000  | -0.52626500 |
| C  | 2.32372600  | 5.18284700  | 0.81212400  |
| H  | 1.09350800  | 6.18717100  | -0.66396300 |
| H  | 2.26978900  | 5.08694300  | -1.35399500 |
| H  | 3.09908600  | 5.95787700  | 0.83330900  |
| H  | 1.63756300  | 5.36691700  | 1.64729500  |
| H  | 2.80159100  | 4.21332400  | 0.98762900  |
| C  | -1.61128600 | 5.44410900  | 0.09977400  |
| C  | -1.84852300 | 5.48066100  | 1.62252200  |
| H  | -2.57941900 | 5.47216700  | -0.41830500 |
| H  | -1.07878800 | 6.35268100  | -0.20496400 |
| H  | -2.43409500 | 6.36131600  | 1.91140900  |
| H  | -2.38491900 | 4.58487200  | 1.95476200  |
| H  | -0.89390500 | 5.51051500  | 2.15961400  |
| C  | -5.72616700 | 1.98141800  | 0.32930400  |
| C  | -5.66369800 | 2.43097600  | 1.80249200  |
| H  | -6.71851100 | 1.56335600  | 0.12256000  |

|   |             |             |             |
|---|-------------|-------------|-------------|
| H | -5.62612900 | 2.85988900  | -0.32185800 |
| H | -6.43487600 | 3.17897100  | 2.02061200  |
| H | -5.81381500 | 1.57709700  | 2.47271300  |
| H | -4.68619500 | 2.86670600  | 2.03735800  |
| C | -6.00252600 | -1.23996800 | 0.18962900  |
| C | -6.03254200 | -1.81248600 | 1.62054900  |
| H | -6.04597200 | -2.06648100 | -0.53200900 |
| H | -6.90779200 | -0.64448900 | 0.02202500  |
| H | -6.92198700 | -2.43317100 | 1.77995900  |
| H | -5.14632100 | -2.42728900 | 1.81431700  |
| H | -6.04115000 | -1.00325300 | 2.35936800  |
| C | -2.50848200 | -5.31315400 | -0.25256000 |
| C | -2.83072000 | -5.40435100 | 1.25200400  |
| H | -2.10813400 | -6.27492400 | -0.59422600 |
| H | -3.43990100 | -5.15684000 | -0.81313800 |
| H | -3.55462200 | -6.20230300 | 1.45456300  |
| H | -1.92188900 | -5.60992600 | 1.82875900  |
| H | -3.24873400 | -4.46022900 | 1.61905700  |
| C | 0.69776600  | -5.53378600 | -0.67909700 |
| C | 1.39935300  | -5.64304200 | 0.69037200  |
| H | 1.45474500  | -5.51012900 | -1.47434900 |
| H | 0.10112400  | -6.43649600 | -0.85583700 |
| H | 2.07920900  | -6.50269700 | 0.72056400  |
| H | 1.97264400  | -4.73531300 | 0.90940100  |
| H | 0.65988200  | -5.76300000 | 1.49043800  |
| C | 4.66975800  | -2.04043900 | -1.66958400 |
| C | 5.10350600  | -2.54099600 | -0.27638900 |
| H | 5.53422100  | -1.60001800 | -2.18061900 |
| H | 4.35775200  | -2.89813700 | -2.28002300 |
| H | 5.91717100  | -3.27176600 | -0.35070400 |
| H | 5.44716000  | -1.70082300 | 0.33827300  |
| H | 4.26290300  | -3.00970100 | 0.24625800  |
| C | 4.87292600  | 1.17459500  | -1.92600500 |
| C | 5.65623100  | 1.57441300  | -0.66394500 |
| H | 4.57352000  | 2.07932300  | -2.46963000 |
| H | 5.54010300  | 0.62650500  | -2.60290300 |
| H | 6.50454900  | 2.22250400  | -0.91426400 |
| H | 5.01539400  | 2.10330000  | 0.04927000  |
| H | 6.04721300  | 0.68050300  | -0.16632500 |
| H | 3.39231100  | -1.48378800 | 2.03238200  |

**ossTS4**

|   |             |             |             |
|---|-------------|-------------|-------------|
| N | -2.67830400 | -0.75727300 | -0.45926700 |
| N | -0.20483100 | -1.90160600 | -1.53376600 |



|    |             |             |             |
|----|-------------|-------------|-------------|
| N  | 0.83874300  | 0.77797500  | -1.92396100 |
| N  | -1.58739500 | 1.90368300  | -0.84152400 |
| C  | -3.75228900 | -0.04431500 | -0.00721700 |
| C  | -4.79676200 | -0.95653600 | 0.42905900  |
| C  | -4.32016000 | -2.22562200 | 0.22328600  |
| C  | -2.98628800 | -2.08640000 | -0.34035900 |
| C  | -2.14917500 | -3.14067500 | -0.69767700 |
| C  | -0.86484200 | -3.06265400 | -1.22902600 |
| C  | -0.00994900 | -4.20008700 | -1.53356700 |
| C  | 1.16463500  | -3.69202700 | -2.02407400 |
| C  | 1.02213000  | -2.24486000 | -2.02635400 |
| C  | 1.99830600  | -1.33359900 | -2.42640400 |
| C  | 1.91888800  | 0.05288100  | -2.38341800 |
| C  | 2.96269900  | 0.96279600  | -2.81968000 |
| C  | 2.48123800  | 2.23608300  | -2.64910500 |
| C  | 1.15344900  | 2.10875000  | -2.07352400 |
| C  | 0.33804100  | 3.16615300  | -1.68720700 |
| C  | -0.91899000 | 3.07751200  | -1.09951700 |
| C  | -1.73346000 | 4.20449800  | -0.68294400 |
| C  | -2.90600400 | 3.68960500  | -0.19268900 |
| C  | -2.81321000 | 2.24560100  | -0.30687900 |
| C  | -3.80924200 | 1.34775800  | 0.05799600  |
| H  | 2.92925300  | -1.75273000 | -2.78983600 |
| H  | -2.53961000 | -4.13894500 | -0.53417600 |
| H  | -4.72626000 | 1.77611500  | 0.44679500  |
| H  | 0.72588800  | 4.16427200  | -1.85559200 |
| C  | -1.86353600 | -0.22600000 | -3.11259900 |
| H  | -2.32309200 | -1.21366600 | -3.17335300 |
| H  | -2.61789600 | 0.56282600  | -3.18580500 |
| H  | -1.08167600 | -0.11090000 | -3.86886300 |
| C  | -0.17962000 | -0.32017700 | 0.77939400  |
| C  | -0.93373600 | 0.00970800  | 1.92813500  |
| C  | 1.07819600  | -0.90579400 | 0.98695800  |
| C  | -0.39388100 | -0.13050700 | 3.19469300  |
| H  | -1.92890400 | 0.42929900  | 1.82424700  |
| C  | 1.64776900  | -1.07151700 | 2.25175600  |
| H  | 1.68393600  | -1.21668200 | 0.14776900  |
| C  | 0.90385200  | -0.67298600 | 3.41095500  |
| O  | 1.33579500  | -0.79188600 | 4.65051800  |
| Ir | -0.88921100 | 0.01990300  | -1.16132000 |
| H  | -0.94437000 | 0.17573400  | 4.08016800  |
| C  | 3.00773800  | -1.67599100 | 2.25908300  |
| O  | 3.62411100  | -1.98884100 | 1.25138400  |
| O  | 3.52670600  | -1.86690300 | 3.49382600  |

|   |             |             |             |
|---|-------------|-------------|-------------|
| C | 4.81583900  | -2.49333200 | 3.51423000  |
| H | 4.77776700  | -3.47438400 | 3.03174100  |
| H | 5.55648000  | -1.87820100 | 2.99307300  |
| H | 5.07267000  | -2.59263000 | 4.56972600  |
| C | -0.35975400 | -5.63227200 | -1.25119200 |
| C | -0.21933000 | -5.99282400 | 0.24122300  |
| H | 0.28617600  | -6.29037600 | -1.84404500 |
| H | -1.38728500 | -5.83971500 | -1.57940500 |
| H | -0.48572300 | -7.04108800 | 0.41948500  |
| H | 0.81009700  | -5.83540700 | 0.58051100  |
| H | -0.86799800 | -5.36259800 | 0.85954900  |
| C | 2.42564500  | -4.42448100 | -2.37819300 |
| C | 3.41112000  | -4.48303100 | -1.19262800 |
| H | 2.91221600  | -3.94140400 | -3.23560500 |
| H | 2.18404100  | -5.44332900 | -2.70450300 |
| H | 4.35194600  | -4.96187200 | -1.48928000 |
| H | 3.63010500  | -3.48423600 | -0.80262000 |
| H | 2.98016400  | -5.05936300 | -0.36630800 |
| C | 4.33686000  | 0.53124000  | -3.24052400 |
| C | 5.22790400  | 0.20309800  | -2.02330500 |
| H | 4.81013200  | 1.32022400  | -3.83660700 |
| H | 4.27392100  | -0.34770300 | -3.89491600 |
| H | 6.20673500  | -0.17312400 | -2.34240100 |
| H | 5.38797300  | 1.10046500  | -1.41509500 |
| H | 4.75802900  | -0.54839900 | -1.37904000 |
| C | 3.17000700  | 3.54155600  | -2.93138900 |
| C | 3.75386200  | 4.22091000  | -1.67681000 |
| H | 2.46453100  | 4.22921300  | -3.41692900 |
| H | 3.97579400  | 3.37624900  | -3.65599600 |
| H | 4.22391500  | 5.17631200  | -1.93667900 |
| H | 2.97386900  | 4.41423700  | -0.93245300 |
| H | 4.50568900  | 3.58516300  | -1.19880300 |
| C | -1.28948800 | 5.63758800  | -0.72904500 |
| C | -0.31917600 | 5.99116100  | 0.41550300  |
| H | -2.16376500 | 6.29669300  | -0.67749700 |
| H | -0.80661100 | 5.85005200  | -1.69219300 |
| H | -0.00405300 | 7.03926300  | 0.35658500  |
| H | -0.79528100 | 5.82859400  | 1.38891300  |
| H | 0.57607000  | 5.36058400  | 0.37749100  |
| C | -4.05948200 | 4.42296200  | 0.42812700  |
| C | -4.02919200 | 4.37256100  | 1.96844300  |
| H | -5.00846600 | 4.00248500  | 0.06963900  |
| H | -4.05043900 | 5.46906000  | 0.10084500  |
| H | -4.88543500 | 4.90520400  | 2.39795300  |

|   |             |             |             |
|---|-------------|-------------|-------------|
| H | -4.05373100 | 3.33710400  | 2.32602600  |
| H | -3.11072900 | 4.83190100  | 2.35069200  |
| C | -6.09150000 | -0.53320500 | 1.05992000  |
| C | -5.92713400 | -0.14914600 | 2.54379700  |
| H | -6.82436700 | -1.34423000 | 0.97656300  |
| H | -6.51713000 | 0.31664800  | 0.50981900  |
| H | -6.88306300 | 0.16411900  | 2.97923500  |
| H | -5.54682300 | -0.99863500 | 3.12181400  |
| H | -5.21196800 | 0.67336200  | 2.65805300  |
| C | -4.96867000 | -3.53384500 | 0.57181300  |
| C | -4.43659400 | -4.12262900 | 1.89342600  |
| H | -4.81084700 | -4.25828300 | -0.23815400 |
| H | -6.05384700 | -3.39776500 | 0.64799300  |
| H | -4.91837500 | -5.08072200 | 2.12015900  |
| H | -3.35429300 | -4.28487800 | 1.84235700  |
| H | -4.62672500 | -3.43576600 | 2.72558200  |
| C | 3.22148800  | 1.79945500  | 0.87536800  |
| C | 1.99746800  | 2.40580100  | 1.50381500  |
| C | 1.94746900  | 2.22823600  | 2.98706300  |
| C | 2.96440600  | 1.69410200  | 3.73464600  |
| C | 4.29155600  | 1.34779100  | 3.08776700  |
| C | 4.25009600  | 1.33104500  | 1.58250600  |
| H | 1.01407200  | 2.48555700  | 3.48312400  |
| H | 5.05137800  | 2.06542800  | 3.44087500  |
| H | 4.62603400  | 0.37320200  | 3.46453300  |
| C | 2.75869400  | 1.30645200  | 5.10128400  |
| H | 3.63883200  | 1.06057400  | 5.69706600  |
| H | 1.97462800  | 1.82409100  | 5.65615400  |
| H | 2.11566500  | 0.08057200  | 4.90963500  |
| H | 1.09562600  | 1.95176400  | 1.06471500  |
| H | 1.91803700  | 3.47513400  | 1.23606200  |
| H | 3.22952400  | 1.72961900  | -0.20610600 |
| H | 5.09910100  | 0.88021500  | 1.07322100  |

### **<sup>3</sup>TS4**

|   |             |             |             |
|---|-------------|-------------|-------------|
| N | -2.70295600 | -0.72030400 | -0.46386700 |
| N | -0.24573900 | -1.90691500 | -1.52275900 |
| N | 0.83947900  | 0.75976400  | -1.92056500 |
| N | -1.57368700 | 1.91531000  | -0.84339500 |
| C | -3.76356900 | 0.00619900  | 0.00135700  |
| C | -4.81841500 | -0.89140700 | 0.44327900  |
| C | -4.36250700 | -2.16652500 | 0.23207400  |
| C | -3.03005300 | -2.04667800 | -0.33961100 |
| C | -2.20802100 | -3.11385500 | -0.68939400 |

|    |             |             |             |
|----|-------------|-------------|-------------|
| C  | -0.91999100 | -3.05714200 | -1.21635100 |
| C  | -0.07944000 | -4.20691200 | -1.51182000 |
| C  | 1.10378600  | -3.71564800 | -1.99985700 |
| C  | 0.97924800  | -2.26707100 | -2.00852600 |
| C  | 1.96774500  | -1.37015700 | -2.41201700 |
| C  | 1.90890900  | 0.01774800  | -2.37492700 |
| C  | 2.96626200  | 0.91062600  | -2.81794300 |
| C  | 2.50108200  | 2.19062000  | -2.65856700 |
| C  | 1.17142000  | 2.08288100  | -2.08040000 |
| C  | 0.36814200  | 3.15191200  | -1.69903300 |
| C  | -0.88677800 | 3.08170600  | -1.10625700 |
| C  | -1.68001700 | 4.21949700  | -0.68333300 |
| C  | -2.85632200 | 3.72324800  | -0.18107600 |
| C  | -2.78958500 | 2.27943600  | -0.29587700 |
| C  | -3.79729100 | 1.39784500  | 0.07502900  |
| H  | 2.89355700  | -1.80394700 | -2.77143800 |
| H  | -2.61276700 | -4.10558400 | -0.52089800 |
| H  | -4.70311600 | 1.83983200  | 0.47459400  |
| H  | 0.76812100  | 4.14467000  | -1.87101300 |
| C  | -1.77564200 | -0.25300800 | -3.17180300 |
| H  | -2.40409800 | -1.14404000 | -3.16693900 |
| H  | -2.36146800 | 0.65408600  | -3.34697500 |
| H  | -0.94322400 | -0.34904400 | -3.87170400 |
| C  | -0.14892200 | -0.32807400 | 0.78055200  |
| C  | -0.89121200 | 0.02061400  | 1.92606400  |
| C  | 1.11857300  | -0.88011700 | 0.97051400  |
| C  | -0.35542000 | -0.15459500 | 3.19354600  |
| H  | -1.88249900 | 0.45117500  | 1.82696500  |
| C  | 1.67982700  | -1.08568000 | 2.23720800  |
| H  | 1.73180600  | -1.15842900 | 0.12578800  |
| C  | 0.93334600  | -0.71437600 | 3.40021600  |
| O  | 1.37052700  | -0.85198800 | 4.64028700  |
| Ir | -0.91125700 | 0.02826400  | -1.16455400 |
| H  | -0.91155900 | 0.12745500  | 4.08356400  |
| C  | 3.03599800  | -1.69665900 | 2.23265700  |
| O  | 3.65207300  | -1.99016900 | 1.21789200  |
| O  | 3.55753500  | -1.91336400 | 3.46195200  |
| C  | 4.84793100  | -2.53661700 | 3.46659900  |
| H  | 4.81298600  | -3.50569200 | 2.96013600  |
| H  | 5.58705200  | -1.90681900 | 2.96080600  |
| H  | 5.10539700  | -2.66099600 | 4.51932800  |
| C  | -0.44912700 | -5.63318900 | -1.22484300 |
| C  | -0.32128000 | -5.98884800 | 0.26989500  |
| H  | 0.19138100  | -6.30221100 | -1.81133500 |

|   |             |             |             |
|---|-------------|-------------|-------------|
| H | -1.47753500 | -5.82898800 | -1.55757300 |
| H | -0.60186300 | -7.03287900 | 0.45117500  |
| H | 0.70812200  | -5.84289400 | 0.61419700  |
| H | -0.96513800 | -5.34782000 | 0.88213200  |
| C | 2.35593500  | -4.46663400 | -2.34673800 |
| C | 3.33328900  | -4.54146000 | -1.15536900 |
| H | 2.85511400  | -3.99036000 | -3.20066300 |
| H | 2.10072200  | -5.48135200 | -2.67567200 |
| H | 4.26807400  | -5.03491400 | -1.44713400 |
| H | 3.56612600  | -3.54658600 | -0.76334400 |
| H | 2.88846200  | -5.11231700 | -0.33254500 |
| C | 4.33522200  | 0.45683200  | -3.23206900 |
| C | 5.21861300  | 0.12704900  | -2.00953700 |
| H | 4.82054700  | 1.23429000  | -3.83365000 |
| H | 4.26202600  | -0.42672200 | -3.87921900 |
| H | 6.19191900  | -0.26776600 | -2.32308000 |
| H | 5.39210900  | 1.02829700  | -1.41079900 |
| H | 4.73636200  | -0.60971400 | -1.35743700 |
| C | 3.20188500  | 3.48590000  | -2.95859800 |
| C | 3.79800700  | 4.17744800  | -1.71667500 |
| H | 2.50086600  | 4.17373800  | -3.45049900 |
| H | 4.00282900  | 3.30347200  | -3.68451700 |
| H | 4.27040100  | 5.12740400  | -1.99183700 |
| H | 3.02497100  | 4.38376000  | -0.96851100 |
| H | 4.55088200  | 3.54441700  | -1.23680400 |
| C | -1.21630200 | 5.64624600  | -0.73490100 |
| C | -0.23503000 | 5.98916900  | 0.40338500  |
| H | -2.08119900 | 6.31732200  | -0.68019300 |
| H | -0.73603700 | 5.84981200  | -1.70125200 |
| H | 0.09290700  | 7.03307300  | 0.34067700  |
| H | -0.70739700 | 5.83431000  | 1.37983400  |
| H | 0.65191400  | 5.34741200  | 0.36136800  |
| C | -3.99137700 | 4.47561500  | 0.45079600  |
| C | -3.94679400 | 4.42406600  | 1.99077900  |
| H | -4.95052200 | 4.07071300  | 0.10155400  |
| H | -3.96835600 | 5.52147600  | 0.12355500  |
| H | -4.79034700 | 4.97003400  | 2.42850300  |
| H | -3.98422400 | 3.38903000  | 2.34837500  |
| H | -3.01762700 | 4.86872500  | 2.36433200  |
| C | -6.10155100 | -0.44969900 | 1.08511300  |
| C | -5.92012000 | -0.07272900 | 2.56886800  |
| H | -6.84762700 | -1.24892800 | 1.00496800  |
| H | -6.51789100 | 0.40838100  | 0.54064500  |
| H | -6.86767600 | 0.25480700  | 3.01200100  |

|   |             |             |             |
|---|-------------|-------------|-------------|
| H | -5.54968200 | -0.93001400 | 3.14169000  |
| H | -5.19073300 | 0.73751600  | 2.68053400  |
| C | -5.02785300 | -3.46536500 | 0.58418700  |
| C | -4.50005400 | -4.06030300 | 1.90480800  |
| H | -4.88298300 | -4.19274900 | -0.22557100 |
| H | -6.11076900 | -3.31397700 | 0.66373900  |
| H | -4.99427900 | -5.01154700 | 2.13352100  |
| H | -3.42022000 | -4.23733400 | 1.85127200  |
| H | -4.67860300 | -3.37034800 | 2.73692500  |
| C | 3.25499000  | 1.80830200  | 0.87237400  |
| C | 2.03755500  | 2.43664600  | 1.49243600  |
| C | 1.96471100  | 2.24244200  | 2.97364700  |
| C | 2.96230000  | 1.68288300  | 3.72679100  |
| C | 4.29193600  | 1.32287800  | 3.09270600  |
| C | 4.26697900  | 1.31592700  | 1.58699500  |
| H | 1.02776200  | 2.50573500  | 3.45983700  |
| H | 5.05789300  | 2.02740600  | 3.45897400  |
| H | 4.60804300  | 0.34110100  | 3.46660900  |
| C | 2.73742400  | 1.28500800  | 5.09012500  |
| H | 3.61363700  | 1.04892700  | 5.69632600  |
| H | 1.94891600  | 1.80626100  | 5.63589400  |
| H | 2.12120400  | 0.06456200  | 4.90629400  |
| H | 1.13113100  | 2.00969100  | 1.03570400  |
| H | 1.98948100  | 3.51108200  | 1.23881000  |
| H | 3.27090300  | 1.74142100  | -0.20922300 |
| H | 5.11123200  | 0.84945100  | 1.08403100  |

## 8

|   |             |             |             |
|---|-------------|-------------|-------------|
| C | -0.27744600 | -1.22482600 | 0.00020300  |
| C | -1.04607600 | -0.06805700 | 0.00005400  |
| C | -0.36711600 | 1.29662500  | -0.00037600 |
| C | 1.13705800  | 1.24591400  | 0.00022200  |
| C | 1.84704500  | 0.11651500  | 0.00029500  |
| C | 1.22110300  | -1.25241200 | -0.00032700 |
| H | -0.71322000 | 1.87217500  | -0.87296300 |
| H | -0.78895600 | -2.18605900 | 0.00048900  |
| H | 1.65015100  | 2.20655400  | 0.00051700  |
| H | 2.93492700  | 0.15790900  | 0.00067700  |
| H | 1.58475300  | -1.82661500 | -0.87110800 |
| H | 1.58541000  | -1.82783600 | 0.86932000  |
| H | -0.71387000 | 1.87303900  | 0.87138100  |
| C | -2.43711600 | -0.11395600 | 0.00014800  |
| H | -2.96929600 | -1.06093400 | 0.00013600  |
| H | -3.03461400 | 0.79294500  | 0.00023800  |

**OSST5**

|    |             |             |             |
|----|-------------|-------------|-------------|
| N  | 1.87666300  | 1.87120900  | -0.69151300 |
| N  | -0.75889300 | 1.16536500  | -1.75593300 |
| N  | -0.08240800 | -1.64481800 | -1.49040400 |
| N  | 2.55419900  | -0.93326200 | -0.52936200 |
| C  | 3.13472300  | 2.00682400  | -0.16826500 |
| C  | 3.42175400  | 3.41482100  | 0.05672800  |
| C  | 2.31343100  | 4.11158900  | -0.34977800 |
| C  | 1.35137400  | 3.13032400  | -0.82524400 |
| C  | 0.06985900  | 3.42209600  | -1.28375900 |
| C  | -0.91141500 | 2.52254300  | -1.69113300 |
| C  | -2.26886300 | 2.87801100  | -2.07313200 |
| C  | -2.91143500 | 1.70772200  | -2.38333100 |
| C  | -1.95047400 | 0.63724900  | -2.16692500 |
| C  | -2.22132200 | -0.72542700 | -2.27982500 |
| C  | -1.36990900 | -1.77769000 | -1.96277100 |
| C  | -1.69738900 | -3.18801300 | -2.09184900 |
| C  | -0.57314100 | -3.89094100 | -1.74423000 |
| C  | 0.43976600  | -2.91105500 | -1.38460600 |
| C  | 1.74443000  | -3.20418200 | -0.99885200 |
| C  | 2.72396500  | -2.29811300 | -0.60273200 |
| C  | 4.05487700  | -2.65006000 | -0.14226600 |
| C  | 4.68126200  | -1.47856800 | 0.19709900  |
| C  | 3.73917100  | -0.40509800 | -0.06373300 |
| C  | 3.99508400  | 0.94924900  | 0.11533000  |
| H  | -3.21520400 | -0.99341200 | -2.61949100 |
| H  | -0.20467400 | 4.47075000  | -1.30340300 |
| H  | 4.97255800  | 1.21050600  | 0.50542200  |
| H  | 2.02152800  | -4.25240800 | -0.98769900 |
| C  | 1.54691500  | 0.28578000  | -3.08756100 |
| H  | 1.54910700  | 1.34139900  | -3.36936700 |
| H  | 2.55958200  | -0.12732000 | -3.14392800 |
| H  | 0.86133400  | -0.27796600 | -3.72676900 |
| C  | -0.28843000 | 0.58926400  | 0.84545900  |
| C  | 0.06449200  | 1.66033700  | 1.68078800  |
| C  | -1.60014200 | 0.14696200  | 0.90333700  |
| C  | -0.88572700 | 2.30677200  | 2.47454900  |
| H  | 1.08967500  | 2.01665200  | 1.71279500  |
| C  | -2.58583600 | 0.77130000  | 1.69015100  |
| H  | -1.91478700 | -0.72245400 | 0.34086600  |
| C  | -2.22317900 | 1.89460300  | 2.47834400  |
| O  | -3.08278200 | 2.59823200  | 3.26102700  |
| Ir | 0.88671400  | 0.10576800  | -1.06721400 |

|   |             |             |             |
|---|-------------|-------------|-------------|
| H | -0.60958900 | 3.14614900  | 3.10641100  |
| C | -3.92550000 | 0.16465100  | 1.64376200  |
| O | -4.24277100 | -0.83527600 | 1.02260200  |
| O | -4.86034800 | 0.84610200  | 2.38567800  |
| C | -6.17822500 | 0.27397700  | 2.39620700  |
| H | -6.58793900 | 0.24503500  | 1.38326500  |
| H | -6.14585500 | -0.74201200 | 2.79850900  |
| H | -6.77551200 | 0.92465500  | 3.03599200  |
| C | -2.84475300 | 4.25981200  | -1.97203500 |
| C | -3.18199200 | 4.63037800  | -0.51246800 |
| H | -3.75151000 | 4.33107000  | -2.58425800 |
| H | -2.14201100 | 4.99763400  | -2.38182500 |
| H | -3.58909100 | 5.64605900  | -0.44542800 |
| H | -3.91887800 | 3.93361700  | -0.09796100 |
| H | -2.29165200 | 4.56972600  | 0.12267900  |
| C | -4.34884400 | 1.51167100  | -2.77097100 |
| C | -5.24515000 | 1.13564100  | -1.57449900 |
| H | -4.42577000 | 0.73058500  | -3.53903100 |
| H | -4.72967200 | 2.42908300  | -3.23561100 |
| H | -6.28784400 | 1.01034300  | -1.89089700 |
| H | -4.90984900 | 0.20669900  | -1.10524700 |
| H | -5.21113900 | 1.91865800  | -0.80770700 |
| C | -3.05736100 | -3.71353700 | -2.44695000 |
| C | -4.01842500 | -3.69388400 | -1.24047400 |
| H | -2.97248700 | -4.73776200 | -2.82908700 |
| H | -3.48743000 | -3.12042200 | -3.26453700 |
| H | -5.01974900 | -4.03442700 | -1.52962300 |
| H | -3.64909500 | -4.35695400 | -0.44955800 |
| H | -4.10161500 | -2.68914600 | -0.81297400 |
| C | -0.38960200 | -5.37938900 | -1.66619200 |
| C | -0.48749300 | -5.92375500 | -0.22746400 |
| H | 0.58395400  | -5.65828200 | -2.09129800 |
| H | -1.14372200 | -5.87419700 | -2.28918800 |
| H | -0.34125200 | -7.00990000 | -0.20566700 |
| H | 0.26830900  | -5.46377000 | 0.41891900  |
| H | -1.47027800 | -5.70141500 | 0.20349400  |
| C | 4.55901000  | -4.05590800 | 0.00868100  |
| C | 4.03087500  | -4.73489900 | 1.28822200  |
| H | 5.65514700  | -4.05577000 | 0.02688500  |
| H | 4.27084300  | -4.65427700 | -0.86571800 |
| H | 4.39836900  | -5.76437400 | 1.37019300  |
| H | 4.35279700  | -4.18245600 | 2.17802900  |
| H | 2.93539100  | -4.75915800 | 1.29525800  |
| C | 6.04446700  | -1.29050000 | 0.79717900  |



|   |             |             |             |
|---|-------------|-------------|-------------|
| C | 5.99241900  | -1.06083500 | 2.32054100  |
| H | 6.55064300  | -0.44104300 | 0.31964700  |
| H | 6.66468700  | -2.16945900 | 0.58610400  |
| H | 6.99764800  | -0.91600400 | 2.73300900  |
| H | 5.39132900  | -0.17705800 | 2.56199500  |
| H | 5.53410700  | -1.91935400 | 2.82422800  |
| C | 4.67398600  | 3.93939100  | 0.69728100  |
| C | 4.67190200  | 3.76632500  | 2.22897800  |
| H | 4.79497000  | 5.00163700  | 0.45447800  |
| H | 5.55201200  | 3.43084300  | 0.27683500  |
| H | 5.59988000  | 4.14639300  | 2.67190500  |
| H | 3.83034800  | 4.30708100  | 2.67636600  |
| H | 4.56799300  | 2.71019400  | 2.50208200  |
| C | 2.04228700  | 5.58352200  | -0.23679800 |
| C | 1.19503300  | 5.92303700  | 1.00639800  |
| H | 1.52682100  | 5.94232700  | -1.13731800 |
| H | 2.98956600  | 6.13364400  | -0.19064800 |
| H | 0.98020800  | 6.99671300  | 1.05857200  |
| H | 0.24372000  | 5.37975300  | 0.99153500  |
| H | 1.72348900  | 5.63325600  | 1.92167800  |
| C | -3.04794200 | -2.50628800 | 3.69210400  |
| C | -2.59067300 | -3.25569000 | 2.46960500  |
| C | -1.21053200 | -2.88610100 | 2.02823700  |
| C | -0.40549300 | -1.97693800 | 2.67544900  |
| C | -0.87845100 | -1.27323900 | 3.93464000  |
| C | -2.28676200 | -1.61920700 | 4.33627500  |
| H | -0.85523900 | -3.32550500 | 1.09943500  |
| H | -0.19106600 | -1.50236900 | 4.76451400  |
| H | -0.79472700 | -0.18853600 | 3.78058100  |
| C | 0.81694500  | -1.59604900 | 2.10740900  |
| H | 1.46072300  | -0.86102800 | 2.57632600  |
| H | 1.20435300  | -2.11312300 | 1.24487500  |
| H | -3.96557300 | 2.19068500  | 3.17891100  |
| H | -3.28933800 | -3.05840800 | 1.64179700  |
| H | -2.65348000 | -4.34544900 | 2.64074900  |
| H | -4.06155600 | -2.70629100 | 4.03577600  |
| H | -2.68159600 | -1.09661900 | 5.20620500  |

**<sup>3</sup>TS5**

|   |             |             |             |
|---|-------------|-------------|-------------|
| N | 1.72398500  | 1.93951900  | -0.75663600 |
| N | -0.89990400 | 1.01567000  | -1.67447000 |
| N | 0.02657700  | -1.73128200 | -1.46405200 |
| N | 2.61568100  | -0.80445000 | -0.59394000 |
| C | 2.99621400  | 2.18389100  | -0.32427000 |

|    |             |             |             |
|----|-------------|-------------|-------------|
| C  | 3.17389500  | 3.60966600  | -0.10060000 |
| C  | 1.97720000  | 4.20605400  | -0.40378500 |
| C  | 1.07350500  | 3.14726100  | -0.82325300 |
| C  | -0.25629800 | 3.32814400  | -1.18934500 |
| C  | -1.17272400 | 2.35109800  | -1.57251500 |
| C  | -2.55424200 | 2.59263400  | -1.95214300 |
| C  | -3.07585600 | 1.38402700  | -2.33934600 |
| C  | -2.02772200 | 0.39728400  | -2.13799600 |
| C  | -2.17422900 | -0.98193400 | -2.27588100 |
| C  | -1.25231500 | -1.96217200 | -1.92555800 |
| C  | -1.49786500 | -3.39420000 | -1.97449600 |
| C  | -0.33853300 | -4.01121000 | -1.58354100 |
| C  | 0.61744400  | -2.95662600 | -1.28701300 |
| C  | 1.93869900  | -3.14786700 | -0.89455200 |
| C  | 2.86620900  | -2.16081200 | -0.57945400 |
| C  | 4.22822200  | -2.39846300 | -0.14384500 |
| C  | 4.79503900  | -1.17107500 | 0.09052600  |
| C  | 3.78325800  | -0.17472000 | -0.19907100 |
| C  | 3.95261800  | 1.19777900  | -0.08358400 |
| H  | -3.13682200 | -1.33115800 | -2.63163600 |
| H  | -0.62482700 | 4.34762000  | -1.16984500 |
| H  | 4.92773400  | 1.53873000  | 0.24582500  |
| H  | 2.27778300  | -4.17460500 | -0.81711200 |
| C  | 1.33252600  | 0.38852600  | -3.17634400 |
| H  | 1.25357900  | 1.44902100  | -3.42483900 |
| H  | 2.36159100  | 0.03734900  | -3.31139900 |
| H  | 0.63452400  | -0.20240700 | -3.77513600 |
| C  | -0.08309300 | 0.30919100  | 0.89890700  |
| C  | 0.23096400  | 1.49848000  | 1.66694400  |
| C  | -1.48998700 | -0.00096000 | 0.87730800  |
| C  | -0.72089700 | 2.22929500  | 2.34150500  |
| H  | 1.26700000  | 1.81599200  | 1.73140300  |
| C  | -2.46586000 | 0.70968400  | 1.56651800  |
| H  | -1.82301200 | -0.87163800 | 0.33219300  |
| C  | -2.08933400 | 1.87745500  | 2.29123900  |
| O  | -2.95259600 | 2.69400800  | 2.94160700  |
| Ir | 0.87407200  | 0.08888100  | -1.08112100 |
| H  | -0.45110900 | 3.10883000  | 2.91958600  |
| C  | -3.83565100 | 0.16616200  | 1.49394400  |
| O  | -4.16278700 | -0.89671700 | 1.00144700  |
| O  | -4.77757100 | 0.99728700  | 2.05519000  |
| C  | -6.11909200 | 0.47885900  | 2.09230300  |
| H  | -6.49232400 | 0.32214000  | 1.07769300  |
| H  | -6.14118200 | -0.46952100 | 2.63510000  |

|   |             |             |             |
|---|-------------|-------------|-------------|
| H | -6.71091300 | 1.23558000  | 2.60845300  |
| C | -3.26803500 | 3.90106600  | -1.78156100 |
| C | -3.61808900 | 4.16264600  | -0.30081600 |
| H | -4.18675500 | 3.90373800  | -2.37986800 |
| H | -2.65368700 | 4.72869000  | -2.16096700 |
| H | -4.15002500 | 5.11384500  | -0.18248000 |
| H | -4.24949000 | 3.35993200  | 0.09626100  |
| H | -2.71544800 | 4.19130200  | 0.31814100  |
| C | -4.47007600 | 1.08778000  | -2.81428800 |
| C | -5.42912700 | 0.68328200  | -1.67907300 |
| H | -4.44282900 | 0.28894800  | -3.56656200 |
| H | -4.87077900 | 1.96969800  | -3.32887800 |
| H | -6.43410500 | 0.48243500  | -2.06948800 |
| H | -5.07141000 | -0.20854100 | -1.15760600 |
| H | -5.50415100 | 1.48723900  | -0.93747900 |
| C | -2.83277000 | -4.01282600 | -2.26887600 |
| C | -3.77342700 | -3.95245600 | -1.04688900 |
| H | -2.69931200 | -5.05669600 | -2.57638200 |
| H | -3.30571800 | -3.50466700 | -3.11959300 |
| H | -4.75888400 | -4.36764400 | -1.28902000 |
| H | -3.35453500 | -4.52939700 | -0.21471300 |
| H | -3.90448300 | -2.92410600 | -0.69387900 |
| C | -0.07673400 | -5.47709600 | -1.39281100 |
| C | -0.15910600 | -5.90868600 | 0.08491800  |
| H | 0.91432300  | -5.73438200 | -1.79043600 |
| H | -0.79745800 | -6.05820700 | -1.97977000 |
| H | 0.06092700  | -6.97680800 | 0.19571100  |
| H | 0.55051200  | -5.34429100 | 0.69967700  |
| H | -1.16035900 | -5.72003600 | 0.48734900  |
| C | 4.82244500  | -3.75809900 | 0.08182800  |
| C | 4.37118700  | -4.37996100 | 1.41875900  |
| H | 5.91646600  | -3.69111600 | 0.06505000  |
| H | 4.54715100  | -4.42880900 | -0.74274500 |
| H | 4.80184100  | -5.37880400 | 1.55371500  |
| H | 4.68492500  | -3.75287700 | 2.26056500  |
| H | 3.27992000  | -4.46577000 | 1.46273400  |
| C | 6.16393200  | -0.86550100 | 0.62590400  |
| C | 6.15166200  | -0.55475300 | 2.13575500  |
| H | 6.59735900  | -0.01493400 | 0.08331600  |
| H | 6.83061000  | -1.71508500 | 0.43806900  |
| H | 7.16006800  | -0.32596700 | 2.49931500  |
| H | 5.50485800  | 0.30241300  | 2.35356000  |
| H | 5.76694900  | -1.41006000 | 2.70215700  |
| C | 4.41979400  | 4.23888800  | 0.45191500  |

|   |             |             |             |
|---|-------------|-------------|-------------|
| C | 4.54096000  | 4.06894400  | 1.97928200  |
| H | 4.43298800  | 5.30715500  | 0.20585200  |
| H | 5.30521500  | 3.80582700  | -0.03246400 |
| H | 5.46189900  | 4.52834400  | 2.35666300  |
| H | 3.68998100  | 4.53620500  | 2.48731000  |
| H | 4.54806200  | 3.00850900  | 2.25555600  |
| C | 1.58368500  | 5.64525100  | -0.24078500 |
| C | 0.80162800  | 5.88788000  | 1.06618600  |
| H | 0.97405800  | 5.96850100  | -1.09477800 |
| H | 2.47867900  | 6.27838100  | -0.25069300 |
| H | 0.49558500  | 6.93659700  | 1.15556800  |
| H | -0.09515200 | 5.26001600  | 1.10779200  |
| H | 1.41906800  | 5.63472300  | 1.93546900  |
| C | -2.93035800 | -2.51184700 | 3.97307400  |
| C | -2.50547200 | -3.27554500 | 2.74757500  |
| C | -1.18991900 | -2.81029200 | 2.19167400  |
| C | -0.41429900 | -1.84492300 | 2.74599300  |
| C | -0.81650700 | -1.16970400 | 4.04272400  |
| C | -2.17679500 | -1.57090700 | 4.54663600  |
| H | -0.88819200 | -3.23794800 | 1.23705100  |
| H | -0.05703700 | -1.37553100 | 4.81631700  |
| H | -0.78176000 | -0.07988900 | 3.90170700  |
| C | 0.71853800  | -1.29504000 | 2.03399400  |
| H | 1.45973700  | -0.73208700 | 2.59840800  |
| H | 1.13962200  | -1.91023100 | 1.25106400  |
| H | -3.85395000 | 2.33651300  | 2.81998300  |
| H | -3.27868600 | -3.16762000 | 1.97017700  |
| H | -2.47632200 | -4.35700400 | 2.97316900  |
| H | -3.90714600 | -2.75504300 | 4.39005700  |
| H | -2.54067300 | -1.04937600 | 5.43148200  |

## 9

|   |             |             |             |
|---|-------------|-------------|-------------|
| C | 0.38574100  | 0.23524400  | 0.91831600  |
| C | 0.40782100  | 1.55866300  | 0.43661200  |
| C | -0.79675100 | -0.47777800 | 0.79093100  |
| C | -0.71282500 | 2.13870100  | -0.13389000 |
| H | 1.33089700  | 2.12915700  | 0.50614700  |
| C | -1.95589100 | 0.08129000  | 0.21336800  |
| H | -0.86187200 | -1.50399100 | 1.13993600  |
| C | -1.91212100 | 1.41616400  | -0.25564100 |
| O | -2.94969200 | 2.06828500  | -0.82701000 |
| H | -0.69725700 | 3.15887100  | -0.50383100 |
| C | -3.14174100 | -0.80018800 | 0.14376600  |
| O | -3.19653000 | -1.94815800 | 0.53352100  |

|   |             |             |             |
|---|-------------|-------------|-------------|
| O | -4.23442200 | -0.18992800 | -0.42551300 |
| C | -5.41939400 | -1.00095300 | -0.51996800 |
| H | -5.22479800 | -1.88621900 | -1.13058100 |
| H | -5.74207600 | -1.31724400 | 0.47512800  |
| H | -6.17225000 | -0.36575800 | -0.98759200 |
| C | 4.98311300  | -0.40629000 | -1.27236000 |
| C | 5.13046200  | 0.42113400  | -0.02298000 |
| C | 3.92139800  | 0.35766300  | 0.87289000  |
| C | 2.82327400  | -0.36033100 | 0.60982900  |
| C | 2.68982500  | -1.19028100 | -0.64703200 |
| C | 3.89370600  | -1.12555400 | -1.54806300 |
| H | 3.97009800  | 0.93931700  | 1.79358200  |
| H | 2.48349100  | -2.23866100 | -0.36999900 |
| H | 1.78972700  | -0.87373800 | -1.19829900 |
| C | 1.63074500  | -0.37488500 | 1.54272400  |
| H | 1.40553300  | -1.40966200 | 1.83735200  |
| H | 1.88399500  | 0.16549700  | 2.46455200  |
| H | 3.84437800  | -1.70546600 | -2.46843600 |
| H | 5.82107500  | -0.39960400 | -1.96759600 |
| H | 5.33986900  | 1.47038100  | -0.29184900 |
| H | 6.02544900  | 0.09864600  | 0.53580200  |
| H | -3.71527100 | 1.46127700  | -0.85331500 |

### **Ir**

|   |             |             |             |
|---|-------------|-------------|-------------|
| N | 1.59372700  | 1.28187300  | -0.23452400 |
| N | -1.28237000 | 1.59468200  | -0.23812600 |
| N | -1.59627600 | -1.28043000 | -0.23810600 |
| N | 1.27951800  | -1.59568200 | -0.23439000 |
| C | 2.92482300  | 0.93279700  | -0.24023400 |
| C | 3.74629900  | 2.13109000  | -0.22812800 |
| C | 2.88842600  | 3.19976800  | -0.22779500 |
| C | 1.54081900  | 2.65703300  | -0.23990700 |
| C | 0.37099800  | 3.40830300  | -0.25469200 |
| C | -0.93343900 | 2.92647700  | -0.24300600 |
| C | -2.13183600 | 3.74732100  | -0.23093900 |
| C | -3.20053400 | 2.88923200  | -0.23141900 |
| C | -2.65811900 | 1.54181100  | -0.24361400 |
| C | -3.40990300 | 0.37225000  | -0.25613800 |
| C | -2.92822400 | -0.93199000 | -0.24360800 |
| C | -3.74859200 | -2.13061000 | -0.23139400 |
| C | -2.89019400 | -3.19908000 | -0.23150100 |
| C | -1.54292100 | -2.65618600 | -0.24314400 |
| C | -0.37319500 | -3.40817900 | -0.25440400 |
| C | 0.93117700  | -2.92706000 | -0.23963200 |

|    |             |             |             |
|----|-------------|-------------|-------------|
| C  | 2.12992100  | -3.74774400 | -0.22732700 |
| C  | 3.19816900  | -2.88930700 | -0.22826000 |
| C  | 2.65460400  | -1.54199100 | -0.24020700 |
| C  | 3.40590900  | -0.37186700 | -0.25479200 |
| H  | -4.48787600 | 0.48991500  | -0.26885500 |
| H  | 0.48830200  | 4.48631500  | -0.26814600 |
| H  | 4.48387300  | -0.48954400 | -0.26960100 |
| H  | -0.49123500 | -4.48611000 | -0.26769200 |
| C  | 0.05004200  | -0.00420600 | -2.35907700 |
| H  | -0.34716900 | 0.94822100  | -2.72244200 |
| H  | 1.08903900  | -0.12812000 | -2.67857200 |
| H  | -0.56048600 | -0.83533300 | -2.72438400 |
| Ir | -0.00178600 | 0.00009400  | -0.29830600 |
| C  | -2.13908200 | 5.24696200  | -0.15671400 |
| C  | -1.86766700 | 5.77298300  | 1.26637500  |
| H  | -3.10712200 | 5.62791400  | -0.50284400 |
| H  | -1.38872800 | 5.65970600  | -0.84430300 |
| H  | -1.86807700 | 6.86902300  | 1.28915000  |
| H  | -2.63390200 | 5.41389000  | 1.96256200  |
| H  | -0.89709400 | 5.42180100  | 1.63410100  |
| C  | -4.66318800 | 3.22016300  | -0.15750700 |
| C  | -5.23489000 | 3.06847700  | 1.26571400  |
| H  | -5.22814200 | 2.57652200  | -0.84502700 |
| H  | -4.82623600 | 4.24760600  | -0.50363600 |
| H  | -6.30494300 | 3.30563300  | 1.28916500  |
| H  | -5.10132500 | 2.04483400  | 1.63296400  |
| H  | -4.71822500 | 3.73878600  | 1.96173900  |
| C  | -5.24823700 | -2.13821200 | -0.15747700 |
| C  | -5.77442300 | -1.86678000 | 1.26554500  |
| H  | -5.62899600 | -3.10630900 | -0.50364100 |
| H  | -5.66093300 | -1.38790900 | -0.84513800 |
| H  | -6.87046300 | -1.86711200 | 1.28818400  |
| H  | -5.41547200 | -2.63300500 | 1.96181600  |
| H  | -5.42320100 | -0.89622200 | 1.63327700  |
| C  | -3.22082400 | -4.66181200 | -0.15752200 |
| C  | -3.06924100 | -5.23358500 | 1.26568000  |
| H  | -2.57713700 | -5.22672500 | -0.84505500 |
| H  | -4.24824400 | -4.82497100 | -0.50366900 |
| H  | -3.30658400 | -6.30359900 | 1.28904200  |
| H  | -2.04562300 | -5.10023300 | 1.63306200  |
| H  | -3.73952600 | -4.71684100 | 1.96167000  |
| C  | 2.13728000  | -5.24734400 | -0.15316900 |
| C  | 1.86439100  | -5.77339800 | 1.26962200  |
| H  | 3.10565400  | -5.62827100 | -0.49838000 |

|   |            |             |             |
|---|------------|-------------|-------------|
| H | 1.38757300 | -5.66004000 | -0.84150900 |
| H | 1.86462800 | -6.86944200 | 1.29236800  |
| H | 2.62995600 | -5.41440700 | 1.96660300  |
| H | 0.89349200 | -5.42207900 | 1.63637800  |
| C | 4.66105100 | -3.21932000 | -0.15514500 |
| C | 5.23419900 | -3.06536200 | 1.26724300  |
| H | 5.22511500 | -2.57648700 | -0.84420800 |
| H | 4.82422200 | -4.24719700 | -0.49992900 |
| H | 6.30430000 | -3.30240100 | 1.28995300  |
| H | 5.10094800 | -2.04119600 | 1.63315200  |
| H | 4.71826100 | -3.73466900 | 1.96476700  |
| C | 5.24597800 | 2.13774000  | -0.15512400 |
| C | 5.77317600 | 1.86458000  | 1.26719300  |
| H | 5.62699400 | 3.10595900  | -0.50067200 |
| H | 5.65784600 | 1.38791600  | -0.84384600 |
| H | 6.86924000 | 1.86459500  | 1.28903900  |
| H | 5.41490500 | 2.63012200  | 1.96456400  |
| H | 5.42197500 | 0.89369700  | 1.63411300  |
| C | 3.21908500 | 4.66243600  | -0.15368200 |
| C | 3.06544200 | 5.23447800  | 1.26919400  |
| H | 2.57632900 | 5.22723100  | -0.84218800 |
| H | 4.24699100 | 4.82551600  | -0.49843800 |
| H | 3.30261400 | 6.30453300  | 1.29274100  |
| H | 2.04129900 | 5.10104900  | 1.63510300  |
| H | 3.73479200 | 4.71790500  | 1.96620900  |

**CSS<sup>TS6</sup>**

|   |             |             |             |
|---|-------------|-------------|-------------|
| N | -0.94090600 | 1.60648300  | -1.33406500 |
| N | -0.78709200 | -1.29403600 | -1.52368300 |
| N | 2.06118800  | -1.16720000 | -0.95020600 |
| N | 1.91555300  | 1.73270700  | -0.78719900 |
| C | -0.81196900 | 2.96630000  | -1.19907600 |
| C | -2.12208700 | 3.58852500  | -1.28752800 |
| C | -3.02816300 | 2.57704500  | -1.48336600 |
| C | -2.27191500 | 1.33678500  | -1.53245800 |
| C | -2.80942500 | 0.07080400  | -1.75478500 |
| C | -2.12691300 | -1.14126000 | -1.77589400 |
| C | -2.71722500 | -2.44030000 | -2.06804900 |
| C | -1.70269400 | -3.35849000 | -1.99902900 |
| C | -0.49277900 | -2.62502700 | -1.65807000 |
| C | 0.76667100  | -3.18845900 | -1.47364800 |
| C | 1.93819700  | -2.52466600 | -1.11572200 |
| C | 3.20789400  | -3.16320300 | -0.82224400 |
| C | 4.08818300  | -2.16189300 | -0.48753200 |

|    |             |             |             |
|----|-------------|-------------|-------------|
| C  | 3.36168400  | -0.90996600 | -0.59256300 |
| C  | 3.89941700  | 0.35528400  | -0.36995300 |
| C  | 3.23966300  | 1.57735400  | -0.47159400 |
| C  | 3.83557900  | 2.88155800  | -0.22615100 |
| C  | 2.84439700  | 3.81039600  | -0.41407800 |
| C  | 1.64074000  | 3.07450300  | -0.76672900 |
| C  | 0.38526500  | 3.63911000  | -0.97434400 |
| H  | 0.83994500  | -4.26303900 | -1.59907400 |
| H  | -3.87762100 | 0.02600000  | -1.93169200 |
| H  | 0.32518000  | 4.71964300  | -0.91534700 |
| H  | 4.94971400  | 0.39335500  | -0.10306700 |
| C  | 0.97931100  | 0.30108400  | -3.19264800 |
| H  | 0.19304100  | 0.86610000  | -3.70744800 |
| H  | 1.94555400  | 0.78995800  | -3.36298800 |
| H  | 1.01128700  | -0.71601600 | -3.60077500 |
| C  | 0.10318200  | 0.20644200  | 0.99366000  |
| C  | 0.56068200  | 1.33726500  | 1.77727900  |
| C  | -1.21194700 | -0.27790900 | 1.29976000  |
| C  | -0.36950000 | 2.21164600  | 2.23326400  |
| H  | 1.61960300  | 1.57348900  | 1.80907600  |
| C  | -2.18289300 | 0.54921300  | 1.78641800  |
| H  | -1.47668700 | -1.29594300 | 1.03887400  |
| C  | -1.82167100 | 1.94560000  | 2.14232300  |
| O  | -2.64061500 | 2.84033100  | 2.36262000  |
| Ir | 0.55669500  | 0.21853200  | -1.11747300 |
| H  | -0.09916300 | 3.19273900  | 2.61373200  |
| C  | -3.53309700 | -0.04281600 | 1.95999000  |
| O  | -3.84027700 | -1.15639600 | 1.55447100  |
| O  | -4.38147100 | 0.73102200  | 2.65701400  |
| C  | -5.69111500 | 0.18024200  | 2.85270500  |
| H  | -6.18631800 | 0.01981500  | 1.89050400  |
| H  | -5.63664400 | -0.77395800 | 3.38523200  |
| H  | -6.23091900 | 0.92251000  | 3.44125900  |
| C  | -4.17212800 | -2.68798700 | -2.34468700 |
| C  | -4.99100200 | -2.93605800 | -1.06294700 |
| H  | -4.27425700 | -3.55163500 | -3.01371600 |
| H  | -4.59725900 | -1.83598300 | -2.88999700 |
| H  | -6.05203300 | -3.07881300 | -1.30102400 |
| H  | -4.63323000 | -3.83457300 | -0.54722100 |
| H  | -4.89143700 | -2.10393400 | -0.36103700 |
| C  | -1.77769400 | -4.84609200 | -2.18787900 |
| C  | -1.78970600 | -5.62427300 | -0.85784900 |
| H  | -0.93094900 | -5.18806400 | -2.79810500 |
| H  | -2.68132600 | -5.09657300 | -2.75571800 |



|   |             |             |             |
|---|-------------|-------------|-------------|
| H | -1.84677400 | -6.70501900 | -1.03233400 |
| H | -0.88317700 | -5.42109800 | -0.27625400 |
| H | -2.64905900 | -5.32783300 | -0.24678800 |
| C | 3.44311200  | -4.64638700 | -0.82095100 |
| C | 2.94264300  | -5.32998100 | 0.46658700  |
| H | 4.51384900  | -4.84853700 | -0.94191900 |
| H | 2.95009700  | -5.10356300 | -1.68878600 |
| H | 3.12799500  | -6.40994700 | 0.43780000  |
| H | 3.45048600  | -4.91777200 | 1.34585600  |
| H | 1.86778000  | -5.17060600 | 0.60422800  |
| C | 5.50857000  | -2.28792100 | -0.01833900 |
| C | 5.63441700  | -2.15273400 | 1.51229100  |
| H | 6.13312700  | -1.52516700 | -0.50167200 |
| H | 5.91712500  | -3.25626500 | -0.32967700 |
| H | 6.67909400  | -2.23503200 | 1.83369300  |
| H | 5.24648500  | -1.18501500 | 1.85032000  |
| H | 5.05695000  | -2.93569400 | 2.01712700  |
| C | 5.24989600  | 3.10255900  | 0.22628800  |
| C | 5.44118400  | 2.81647800  | 1.72895200  |
| H | 5.54735000  | 4.13654500  | 0.01609000  |
| H | 5.93277600  | 2.46704000  | -0.35304900 |
| H | 6.48247600  | 2.97372000  | 2.03331900  |
| H | 4.80425400  | 3.47482400  | 2.33057800  |
| H | 5.16681200  | 1.78241600  | 1.96711700  |
| C | 2.90372600  | 5.29527300  | -0.20165300 |
| C | 2.34389000  | 5.71301100  | 1.17295100  |
| H | 2.34435100  | 5.81103100  | -0.99301100 |
| H | 3.94057500  | 5.64073800  | -0.28905500 |
| H | 2.38333900  | 6.80060900  | 1.30312300  |
| H | 1.30203700  | 5.39208000  | 1.28421600  |
| H | 2.92134600  | 5.24896800  | 1.98067700  |
| C | -2.38098800 | 5.05523800  | -1.09576000 |
| C | -2.28520200 | 5.49580500  | 0.37882200  |
| H | -3.37668200 | 5.30249400  | -1.48139400 |
| H | -1.67151300 | 5.63902500  | -1.69858100 |
| H | -2.51162200 | 6.56393200  | 0.47923400  |
| H | -2.97331500 | 4.92253700  | 1.00539200  |
| H | -1.27950500 | 5.32009200  | 0.77593500  |
| C | -4.52628100 | 2.66372600  | -1.52098700 |
| C | -5.17326600 | 2.13524300  | -0.22373300 |
| H | -4.91876300 | 2.10357500  | -2.38110900 |
| H | -4.82556600 | 3.70639700  | -1.67539300 |
| H | -6.25424400 | 2.31963800  | -0.22387500 |
| H | -5.01469300 | 1.05618100  | -0.12420700 |

|   |             |             |            |
|---|-------------|-------------|------------|
| H | -4.72978500 | 2.60990400  | 0.65700500 |
| C | 1.48576900  | -1.27551100 | 3.53065500 |
| C | 1.32116100  | -1.87119000 | 2.18097200 |
| C | 0.26851200  | -2.90820800 | 2.07487700 |
| C | -0.68570000 | -3.07643900 | 3.00789000 |
| C | -0.66543100 | -2.28499100 | 4.29347800 |
| C | 0.56683400  | -1.44601800 | 4.48901000 |
| H | 0.98024800  | -0.98210300 | 1.44032000 |
| H | 0.22029500  | -3.46218200 | 1.14208300 |
| H | -1.56071300 | -1.64097900 | 4.32810500 |
| H | 0.69467500  | -0.97496700 | 5.46139800 |
| H | 2.26331500  | -2.14196400 | 1.69256300 |
| H | 2.36171200  | -0.65525100 | 3.70496300 |
| H | -0.79101500 | -2.97077700 | 5.14762300 |
| C | -1.86542600 | -3.98460000 | 2.80422700 |
| H | -2.77107900 | -3.37820400 | 2.65629900 |
| H | -1.74223800 | -4.61650500 | 1.92039800 |
| H | -2.03925900 | -4.62931900 | 3.67589900 |

### **<sup>3</sup>TS6**

|   |             |             |             |
|---|-------------|-------------|-------------|
| N | -1.13997000 | 1.11404400  | -1.55399900 |
| N | -0.21432500 | -1.64171300 | -1.49075000 |
| N | 2.43789300  | -0.74580800 | -0.79359400 |
| N | 1.56310300  | 2.00904900  | -0.87769700 |
| C | -1.37976200 | 2.45776900  | -1.46614000 |
| C | -2.79953800 | 2.71252000  | -1.65555600 |
| C | -3.38968900 | 1.49686200  | -1.88767400 |
| C | -2.33281100 | 0.50057300  | -1.81384800 |
| C | -2.50721000 | -0.87652500 | -1.94228300 |
| C | -1.54012900 | -1.86354900 | -1.79957900 |
| C | -1.77038400 | -3.28974300 | -1.95707700 |
| C | -0.55973200 | -3.90938500 | -1.78697800 |
| C | 0.40761800  | -2.86602600 | -1.49182000 |
| C | 1.75167500  | -3.07060100 | -1.19965600 |
| C | 2.68258000  | -2.10217100 | -0.84122500 |
| C | 4.04491300  | -2.36471500 | -0.42106100 |
| C | 4.61758800  | -1.14976200 | -0.13612300 |
| C | 3.61207600  | -0.13739600 | -0.39161000 |
| C | 3.79808300  | 1.23271500  | -0.25804100 |
| C | 2.85507600  | 2.23299800  | -0.48599400 |
| C | 3.06900700  | 3.65820800  | -0.29612800 |
| C | 1.87871400  | 4.27612900  | -0.58274000 |
| C | 0.93817200  | 3.22900500  | -0.94524200 |
| C | -0.41189800 | 3.42772900  | -1.21982000 |

|    |             |             |             |
|----|-------------|-------------|-------------|
| H  | 2.10210900  | -4.09641000 | -1.21744500 |
| H  | -3.51352100 | -1.21618800 | -2.15770700 |
| H  | -0.75894500 | 4.45447700  | -1.20286500 |
| H  | 4.78277500  | 1.55828200  | 0.05827500  |
| C  | 0.96318400  | 0.45705500  | -3.23920000 |
| H  | 0.19597700  | -0.10469600 | -3.77811500 |
| H  | 0.89718100  | 1.52180100  | -3.47267400 |
| H  | 1.96330000  | 0.07319100  | -3.46632000 |
| C  | -0.16387700 | 0.44229900  | 0.96686300  |
| C  | 0.10169800  | 1.67345200  | 1.65273300  |
| C  | -1.44806400 | -0.13834600 | 1.15804600  |
| C  | -0.89416800 | 2.34258600  | 2.30173000  |
| H  | 1.10491700  | 2.08846000  | 1.62623100  |
| C  | -2.48041200 | 0.49640400  | 1.81856900  |
| H  | -1.64270600 | -1.12237100 | 0.75071800  |
| C  | -2.27231400 | 1.84957500  | 2.37074200  |
| O  | -3.16439800 | 2.55654100  | 2.87312000  |
| Ir | 0.66938600  | 0.17322300  | -1.15482000 |
| H  | -0.71712400 | 3.29978700  | 2.78541900  |
| C  | -3.74811500 | -0.26836700 | 1.92342400  |
| O  | -3.87370700 | -1.43278600 | 1.55471200  |
| O  | -4.77098400 | 0.41594300  | 2.46510500  |
| C  | -5.99263400 | -0.32020300 | 2.60604100  |
| H  | -6.37928500 | -0.62147100 | 1.62811700  |
| H  | -5.83807300 | -1.21681200 | 3.21394400  |
| H  | -6.68523400 | 0.36428300  | 3.09716100  |
| C  | -3.11873600 | -3.91572600 | -2.16068100 |
| C  | -3.89890400 | -4.04476100 | -0.83565400 |
| H  | -3.00221100 | -4.90688900 | -2.61518500 |
| H  | -3.70544900 | -3.32283200 | -2.87439700 |
| H  | -4.89906800 | -4.45842600 | -1.01052600 |
| H  | -3.37012100 | -4.71098700 | -0.14461200 |
| H  | -4.00123400 | -3.07783900 | -0.33301100 |
| C  | -0.24616700 | -5.37747800 | -1.83380500 |
| C  | -0.18752100 | -6.03475200 | -0.44154400 |
| H  | 0.71148900  | -5.53386800 | -2.34784600 |
| H  | -1.00066500 | -5.89184900 | -2.44036800 |
| H  | 0.08139000  | -7.09464900 | -0.51776000 |
| H  | 0.55161600  | -5.54024900 | 0.19886000  |
| H  | -1.15906200 | -5.96454200 | 0.05871300  |
| C  | 4.62745700  | -3.73625000 | -0.23980300 |
| C  | 4.16359400  | -4.39943000 | 1.07287200  |
| H  | 5.72196800  | -3.67781700 | -0.24863400 |
| H  | 4.35172000  | -4.37661500 | -1.08799900 |

|   |             |             |             |
|---|-------------|-------------|-------------|
| H | 4.58403200  | -5.40625800 | 1.17633800  |
| H | 4.47858600  | -3.80482000 | 1.93760700  |
| H | 3.07125900  | -4.47664800 | 1.10922800  |
| C | 5.98184200  | -0.87199000 | 0.42514900  |
| C | 5.94528600  | -0.59742700 | 1.94178400  |
| H | 6.43237400  | -0.01266900 | -0.08892000 |
| H | 6.64300700  | -1.72351700 | 0.22765900  |
| H | 6.94841200  | -0.38694400 | 2.32980800  |
| H | 5.30238300  | 0.26083800  | 2.16746100  |
| H | 5.54237200  | -1.46246000 | 2.48041000  |
| C | 4.34307900  | 4.27092700  | 0.20899400  |
| C | 4.50423200  | 4.12664200  | 1.73534500  |
| H | 4.37088800  | 5.33395200  | -0.05728100 |
| H | 5.20516000  | 3.81063600  | -0.29198400 |
| H | 5.44487500  | 4.57323800  | 2.07763000  |
| H | 3.67822900  | 4.62127400  | 2.25833000  |
| H | 4.49758300  | 3.07156700  | 2.03173300  |
| C | 1.52422400  | 5.72823000  | -0.44405500 |
| C | 0.80730300  | 6.02822100  | 0.88819600  |
| H | 0.88490500  | 6.04110000  | -1.27981200 |
| H | 2.43208000  | 6.33908600  | -0.51220700 |
| H | 0.53602000  | 7.08755900  | 0.96086200  |
| H | -0.10596000 | 5.43105500  | 0.98586400  |
| H | 1.45413700  | 5.78024500  | 1.73726400  |
| C | -3.45437100 | 4.05058700  | -1.47488800 |
| C | -3.57973900 | 4.43268100  | 0.01493500  |
| H | -4.45028300 | 4.03749200  | -1.93264100 |
| H | -2.88666600 | 4.82673800  | -2.00637900 |
| H | -4.08132400 | 5.40070800  | 0.12850800  |
| H | -4.14307900 | 3.67939500  | 0.57399300  |
| H | -2.59492500 | 4.49825900  | 0.48927100  |
| C | -4.84488200 | 1.19198000  | -2.09694800 |
| C | -5.53388900 | 0.65394800  | -0.82822600 |
| H | -4.95929800 | 0.46213200  | -2.91002700 |
| H | -5.36031400 | 2.09943600  | -2.43191500 |
| H | -6.60166000 | 0.48188300  | -1.00906500 |
| H | -5.08393800 | -0.29033400 | -0.50638400 |
| H | -5.43167700 | 1.36179900  | 0.00078000  |
| C | 1.30981200  | -0.79527700 | 3.55844400  |
| C | 1.31843000  | -1.45621400 | 2.24344700  |
| C | 0.40086600  | -2.59327700 | 2.09570700  |
| C | -0.63728600 | -2.80012700 | 2.93381600  |
| C | -0.83017500 | -1.93448800 | 4.15534200  |
| C | 0.30528800  | -0.98815400 | 4.42961700  |

|   |             |             |            |
|---|-------------|-------------|------------|
| H | 0.80544500  | -0.57692500 | 1.45441600 |
| H | 0.50738700  | -3.20922200 | 1.20797300 |
| H | -1.76701600 | -1.36166600 | 4.03955300 |
| H | 0.28609400  | -0.45142600 | 5.37566300 |
| H | 2.30010700  | -1.57481200 | 1.78051300 |
| H | 2.10509200  | -0.08740700 | 3.78028700 |
| H | -1.00966200 | -2.57421700 | 5.03612900 |
| C | -1.68366400 | -3.84889700 | 2.68753800 |
| H | -2.65005000 | -3.36562700 | 2.49163400 |
| H | -1.43571500 | -4.46751200 | 1.82017800 |
| H | -1.81189300 | -4.50479100 | 3.55990000 |

## **<sup>2</sup>INT2**

|   |             |             |             |
|---|-------------|-------------|-------------|
| N | 0.90534900  | -1.34002900 | -1.05077000 |
| N | 1.05051800  | 1.54464900  | -0.90222900 |
| N | -1.80692300 | 1.66617200  | -0.45419200 |
| N | -1.96420200 | -1.22473700 | -0.67085400 |
| C | 0.63822800  | -2.68988000 | -1.09202900 |
| C | 1.88067900  | -3.43315600 | -1.21883500 |
| C | 2.89067200  | -2.50793600 | -1.27174100 |
| C | 2.26530700  | -1.19861400 | -1.18154500 |
| C | 2.93772000  | 0.01917100  | -1.23266000 |
| C | 2.38632700  | 1.28892900  | -1.11386300 |
| C | 3.12459300  | 2.54060300  | -1.15627500 |
| C | 2.21419300  | 3.54250500  | -0.95128300 |
| C | 0.91628600  | 2.91039900  | -0.80049200 |
| C | -0.28113300 | 3.58031100  | -0.57653500 |
| C | -1.53912200 | 3.01319300  | -0.39826200 |
| C | -2.76057800 | 3.74522400  | -0.11302000 |
| C | -3.76371100 | 2.81647600  | -0.00731500 |
| C | -3.15722100 | 1.51576700  | -0.23162600 |
| C | -3.83166800 | 0.29870700  | -0.21357500 |
| C | -3.28767400 | -0.96811800 | -0.40307100 |
| C | -4.02017900 | -2.21972200 | -0.31844200 |
| C | -3.11470200 | -3.22384200 | -0.55204400 |
| C | -1.82971000 | -2.58530300 | -0.77539600 |
| C | -0.62698900 | -3.25387400 | -0.99536600 |
| H | -0.22640700 | 4.66182700  | -0.52314300 |
| H | 4.01148000  | -0.03133500 | -1.36938100 |
| H | -0.67961300 | -4.33447600 | -1.06171900 |
| H | -4.89841700 | 0.34175200  | -0.02293600 |
| C | -0.80621400 | 0.27124600  | -2.84917800 |
| H | -0.14881400 | 1.03189400  | -3.28208500 |
| H | -0.59664600 | -0.70673500 | -3.29315300 |

|    |             |             |             |
|----|-------------|-------------|-------------|
| H  | -1.85439200 | 0.54103600  | -3.01155400 |
| C  | -0.72554300 | -0.25088300 | 2.07706700  |
| C  | -0.94125700 | -1.64614700 | 2.18972000  |
| C  | 0.58453800  | 0.26785400  | 2.08136300  |
| C  | 0.13120500  | -2.49879700 | 2.22691300  |
| H  | -1.95674300 | -2.03097600 | 2.19227800  |
| C  | 1.69473900  | -0.56246600 | 2.16275200  |
| H  | 0.74348100  | 1.33970200  | 2.03086500  |
| C  | 1.50786200  | -2.01898400 | 2.16939600  |
| O  | 2.44832000  | -2.84324700 | 2.10026900  |
| Ir | -0.45596800 | 0.16627600  | -0.81877700 |
| H  | 0.00808300  | -3.57598300 | 2.26354800  |
| C  | 3.01982300  | 0.11160400  | 2.25350900  |
| O  | 3.18898400  | 1.29422400  | 2.00118000  |
| O  | 4.00247400  | -0.69000900 | 2.69974200  |
| C  | 5.28413200  | -0.06749000 | 2.85782100  |
| H  | 5.68765600  | 0.23723800  | 1.88786800  |
| H  | 5.21245400  | 0.81260700  | 3.50345700  |
| H  | 5.92119700  | -0.82970500 | 3.30738500  |
| C  | 4.61045900  | 2.67864400  | -1.33782300 |
| C  | 5.35820600  | 2.94305500  | -0.01706300 |
| H  | 4.81628300  | 3.49746500  | -2.04009500 |
| H  | 5.01460300  | 1.77613400  | -1.81103900 |
| H  | 6.44379200  | 2.93048100  | -0.17241000 |
| H  | 5.08566600  | 3.92213500  | 0.39100400  |
| H  | 5.08874500  | 2.19673100  | 0.73422400  |
| C  | 2.47267900  | 5.01489600  | -0.81479900 |
| C  | 2.42255500  | 5.49181400  | 0.65102800  |
| H  | 1.74222200  | 5.58455900  | -1.40580800 |
| H  | 3.45650200  | 5.25114700  | -1.23724200 |
| H  | 2.64159900  | 6.56354100  | 0.72329300  |
| H  | 1.43382600  | 5.31426500  | 1.08818300  |
| H  | 3.14935700  | 4.94449600  | 1.25994600  |
| C  | -2.83655600 | 5.23005400  | 0.09622800  |
| C  | -2.34944300 | 5.65763600  | 1.49463200  |
| H  | -3.86936800 | 5.56952800  | -0.04514000 |
| H  | -2.24121500 | 5.74698200  | -0.66816400 |
| H  | -2.40607100 | 6.74541700  | 1.61727100  |
| H  | -2.96122600 | 5.19120500  | 2.27509400  |
| H  | -1.31140500 | 5.34739400  | 1.65878600  |
| C  | -5.20614800 | 3.03627400  | 0.34690400  |
| C  | -5.50587400 | 2.73247600  | 1.82802300  |
| H  | -5.84793500 | 2.41110000  | -0.28814700 |
| H  | -5.48506400 | 4.07379200  | 0.12890200  |

|   |             |             |             |
|---|-------------|-------------|-------------|
| H | -6.56605300 | 2.89014800  | 2.05765200  |
| H | -5.25267700 | 1.69473900  | 2.07309900  |
| H | -4.91216800 | 3.38090700  | 2.48215700  |
| C | -5.47170600 | -2.33774800 | 0.04666000  |
| C | -5.71553200 | -2.18329900 | 1.56085600  |
| H | -5.85718800 | -3.30963400 | -0.28297600 |
| H | -6.05721200 | -1.58142100 | -0.49286600 |
| H | -6.78231500 | -2.26033200 | 1.80081100  |
| H | -5.18164300 | -2.96130300 | 2.11852700  |
| H | -5.35315600 | -1.21234800 | 1.91725200  |
| C | -3.33067300 | -4.70836400 | -0.49263100 |
| C | -2.88115300 | -5.31472600 | 0.85167300  |
| H | -2.78881600 | -5.20076100 | -1.31081900 |
| H | -4.39132600 | -4.93459600 | -0.65307500 |
| H | -3.03650100 | -6.39954300 | 0.86978000  |
| H | -1.81818400 | -5.11846900 | 1.03193100  |
| H | -3.44516600 | -4.87315000 | 1.68124400  |
| C | 1.98344500  | -4.93134100 | -1.20473100 |
| C | 1.75166400  | -5.54021100 | 0.19329600  |
| H | 2.97515900  | -5.22868400 | -1.56373800 |
| H | 1.26409000  | -5.36265000 | -1.91504700 |
| H | 1.91929700  | -6.62352600 | 0.17751100  |
| H | 2.41471500  | -5.08055000 | 0.93079200  |
| H | 0.72520100  | -5.36157400 | 0.53276600  |
| C | 4.37220600  | -2.74274200 | -1.33634400 |
| C | 5.08403700  | -2.45555000 | 0.00043300  |
| H | 4.81438000  | -2.11996800 | -2.12694700 |
| H | 4.56171500  | -3.78130100 | -1.63027500 |
| H | 6.14963000  | -2.70560900 | -0.06633700 |
| H | 4.99518800  | -1.39861100 | 0.26782900  |
| H | 4.62656000  | -3.02123800 | 0.81577600  |
| H | -1.57167100 | 0.42697200  | 2.04355100  |

**CSS<sup>TS7</sup>**

|   |             |             |             |
|---|-------------|-------------|-------------|
| N | -2.39679200 | -0.89938000 | -0.94488500 |
| N | 0.30448300  | -1.79896300 | -1.46064700 |
| N | 1.18730300  | 0.94438800  | -1.71184300 |
| N | -1.49863100 | 1.85465800  | -1.09450100 |
| C | -3.58413100 | -0.27886200 | -0.63290100 |
| C | -4.59541000 | -1.27891100 | -0.33770200 |
| C | -3.99440800 | -2.50345700 | -0.48113100 |
| C | -2.61546600 | -2.25259800 | -0.86070100 |
| C | -1.63843600 | -3.22956600 | -1.02178400 |
| C | -0.28458200 | -3.02420900 | -1.24902900 |

|    |             |             |             |
|----|-------------|-------------|-------------|
| C  | 0.72781000  | -4.06670300 | -1.27581900 |
| C  | 1.92181100  | -3.45196700 | -1.54135400 |
| C  | 1.64305200  | -2.02919300 | -1.66765100 |
| C  | 2.59015800  | -1.04708400 | -1.94032000 |
| C  | 2.39024700  | 0.32914200  | -1.96275100 |
| C  | 3.42057600  | 1.33532000  | -2.17313300 |
| C  | 2.81711500  | 2.55413400  | -2.01614100 |
| C  | 1.41790400  | 2.29883700  | -1.72946300 |
| C  | 0.46552600  | 3.27596400  | -1.46424800 |
| C  | -0.87133500 | 3.07657800  | -1.13512600 |
| C  | -1.80553000 | 4.12030800  | -0.75307300 |
| C  | -3.00599400 | 3.50614900  | -0.50304900 |
| C  | -2.80468300 | 2.08534300  | -0.72705700 |
| C  | -3.76740600 | 1.09741900  | -0.54365200 |
| H  | 3.60042900  | -1.39520900 | -2.12123200 |
| H  | -1.95786600 | -4.25903100 | -0.90781700 |
| H  | -4.76114200 | 1.43591500  | -0.27137800 |
| H  | 0.80747700  | 4.30436200  | -1.49377600 |
| C  | -0.99964100 | 0.03685800  | -3.39651000 |
| H  | -0.92602800 | 1.06708000  | -3.75991000 |
| H  | -0.26043100 | -0.59249400 | -3.90257400 |
| H  | -2.00778100 | -0.35230100 | -3.57225100 |
| C  | -0.77894900 | 0.12878400  | 1.59516200  |
| C  | -1.27231300 | -1.16701300 | 1.97243900  |
| C  | 0.59422400  | 0.28451600  | 1.33071800  |
| C  | -0.41311900 | -2.19888900 | 2.17496300  |
| H  | -2.34560300 | -1.30882600 | 2.07503700  |
| C  | 1.51371700  | -0.72015300 | 1.60813200  |
| H  | 0.97173100  | 1.25323000  | 1.02532900  |
| C  | 1.04106900  | -2.06858200 | 2.01072800  |
| O  | 1.78195400  | -3.04266800 | 2.21671500  |
| Ir | -0.61388200 | 0.02180900  | -1.37214400 |
| H  | -0.76188600 | -3.19032200 | 2.44696000  |
| C  | 2.93752200  | -0.35142000 | 1.50271600  |
| O  | 3.33859800  | 0.77191200  | 1.20182200  |
| O  | 3.79292700  | -1.33107700 | 1.86769400  |
| C  | 5.18374000  | -0.99291000 | 1.85626100  |
| H  | 5.53884900  | -0.85261200 | 0.83189200  |
| H  | 5.37341700  | -0.07694400 | 2.42368500  |
| H  | 5.68935600  | -1.84457800 | 2.31294400  |
| C  | 0.47488200  | -5.50579600 | -0.93077300 |
| C  | 0.22713400  | -5.71249400 | 0.57847400  |
| H  | 1.33516300  | -6.11004700 | -1.24010100 |
| H  | -0.38402400 | -5.88906100 | -1.49963700 |



|   |             |             |             |
|---|-------------|-------------|-------------|
| H | 0.15702300  | -6.77982900 | 0.81989900  |
| H | 1.02621900  | -5.25827400 | 1.17232000  |
| H | -0.70829300 | -5.23282500 | 0.88736900  |
| C | 3.29110000  | -4.06526700 | -1.59251600 |
| C | 4.12787200  | -3.75403900 | -0.33598400 |
| H | 3.82743000  | -3.71578200 | -2.48632100 |
| H | 3.19556400  | -5.15120300 | -1.70516300 |
| H | 5.07429200  | -4.30828200 | -0.35136900 |
| H | 4.35507600  | -2.68627000 | -0.27940000 |
| H | 3.57571100  | -3.99912100 | 0.57577500  |
| C | 4.87619300  | 1.06508300  | -2.43870600 |
| C | 5.78294200  | 1.40645600  | -1.23999400 |
| H | 5.20279000  | 1.64172400  | -3.31506300 |
| H | 5.01637800  | 0.01296700  | -2.71057900 |
| H | 6.80065000  | 1.02804900  | -1.39498200 |
| H | 5.84734500  | 2.48951600  | -1.09456800 |
| H | 5.37286000  | 0.98343800  | -0.31968500 |
| C | 3.45561900  | 3.91281500  | -2.01702600 |
| C | 3.65266900  | 4.46853900  | -0.59105300 |
| H | 2.84848800  | 4.61913900  | -2.59975700 |
| H | 4.42685300  | 3.85856000  | -2.52294800 |
| H | 4.15842300  | 5.44124500  | -0.61260000 |
| H | 2.68911600  | 4.59418900  | -0.08499400 |
| H | 4.24596100  | 3.77529100  | 0.01348500  |
| C | -1.43570600 | 5.56224900  | -0.55952400 |
| C | -0.69449100 | 5.79978300  | 0.77202900  |
| H | -2.33734200 | 6.18538100  | -0.58698800 |
| H | -0.80404800 | 5.90575100  | -1.38939800 |
| H | -0.40660400 | 6.85133900  | 0.88668200  |
| H | -1.33227300 | 5.52491000  | 1.62068100  |
| H | 0.21187500  | 5.18575100  | 0.82531600  |
| C | -4.27528900 | 4.11641600  | 0.01691100  |
| C | -4.44205500 | 3.92184000  | 1.53723500  |
| H | -5.14167200 | 3.68222800  | -0.49946100 |
| H | -4.29242200 | 5.18829900  | -0.21287400 |
| H | -5.38016900 | 4.36199400  | 1.89496400  |
| H | -4.44271700 | 2.85646000  | 1.79470700  |
| H | -3.61368600 | 4.39392600  | 2.07849200  |
| C | -5.98916600 | -0.97334900 | 0.12991100  |
| C | -6.04410000 | -0.60147900 | 1.62503100  |
| H | -6.63663700 | -1.83997100 | -0.04850000 |
| H | -6.41306400 | -0.15168500 | -0.46256400 |
| H | -7.06815400 | -0.36853000 | 1.93961300  |
| H | -5.67573800 | -1.42943200 | 2.24150600  |

|   |             |             |             |
|---|-------------|-------------|-------------|
| H | -5.41472700 | 0.27154200  | 1.83262100  |
| C | -4.56646200 | -3.86195800 | -0.19625200 |
| C | -4.18136000 | -4.37879600 | 1.20447700  |
| H | -4.22517500 | -4.58015100 | -0.95314800 |
| H | -5.65925000 | -3.82929800 | -0.28070300 |
| H | -4.59064200 | -5.37956100 | 1.38505000  |
| H | -3.09249300 | -4.42773600 | 1.31586600  |
| H | -4.56329900 | -3.70647200 | 1.98132500  |
| C | 0.24981500  | 0.23972400  | 4.42766700  |
| C | -0.61293300 | 1.17901200  | 3.81145000  |
| C | -0.12477700 | 2.48669800  | 3.45280800  |
| C | 1.18939500  | 2.77445100  | 3.57198400  |
| C | 2.18196300  | 1.75792500  | 4.03597800  |
| C | 1.60324200  | 0.44223400  | 4.47763700  |
| H | -0.82525700 | 3.22097700  | 3.06418700  |
| H | 2.90277400  | 1.58626200  | 3.21334200  |
| H | 2.80366100  | 2.17201900  | 4.84884500  |
| H | -1.68413600 | 1.02111400  | 3.86821000  |
| H | -0.16324300 | -0.70559200 | 4.76428600  |
| H | -1.47867100 | 0.90814900  | 1.32401000  |
| H | 1.57042600  | 3.75458100  | 3.29726700  |
| C | 2.54309100  | -0.59794400 | 5.01205600  |
| H | 3.10790500  | -1.06254300 | 4.19296700  |
| H | 3.26978000  | -0.16073400 | 5.70877100  |
| H | 2.00209000  | -1.39984500 | 5.52263700  |

### **<sup>3</sup>TS7**

|   |             |             |             |
|---|-------------|-------------|-------------|
| N | -1.84331800 | 0.61792100  | -1.20435200 |
| N | -0.19697500 | -1.77236500 | -1.45228100 |
| N | 2.18396100  | -0.15040400 | -1.26817100 |
| N | 0.56207700  | 2.21897600  | -0.92815900 |
| C | -2.44103900 | 1.82819600  | -1.01023200 |
| C | -3.87889700 | 1.70003900  | -1.16373400 |
| C | -4.12217300 | 0.39407100  | -1.51011200 |
| C | -2.83651500 | -0.28311400 | -1.49348300 |
| C | -2.63990500 | -1.65063200 | -1.64480900 |
| C | -1.43442100 | -2.34690300 | -1.55912500 |
| C | -1.30491600 | -3.79280800 | -1.57570400 |
| C | 0.03655800  | -4.07008100 | -1.50805700 |
| C | 0.72002800  | -2.79012000 | -1.44215700 |
| C | 2.09927300  | -2.60364700 | -1.38430500 |
| C | 2.78056000  | -1.39364600 | -1.31104100 |
| C | 4.22060900  | -1.24504200 | -1.21742000 |
| C | 4.47853100  | 0.09894400  | -1.12186200 |

|    |             |             |             |
|----|-------------|-------------|-------------|
| C  | 3.19623900  | 0.77765500  | -1.15060100 |
| C  | 3.00442700  | 2.14477500  | -0.98008100 |
| C  | 1.79090100  | 2.81826800  | -0.85367300 |
| C  | 1.63417400  | 4.23402400  | -0.56631900 |
| C  | 0.28810700  | 4.47136300  | -0.47478300 |
| C  | -0.37962700 | 3.20409600  | -0.72144100 |
| C  | -1.75465800 | 3.01884100  | -0.75614800 |
| H  | 2.70871000  | -3.50055100 | -1.39972300 |
| H  | -3.52961600 | -2.24903400 | -1.80541800 |
| H  | -2.36396400 | 3.89536800  | -0.57427300 |
| H  | 3.90079700  | 2.74929700  | -0.89552700 |
| C  | 0.02684900  | 0.50477700  | -3.29483900 |
| H  | -0.69297000 | -0.21636500 | -3.69369900 |
| H  | -0.31332700 | 1.52544800  | -3.49618900 |
| H  | 1.01005400  | 0.33963100  | -3.74814300 |
| C  | 1.52090300  | 0.26747300  | 1.76158800  |
| C  | 1.49891800  | 1.65810400  | 2.20236300  |
| C  | 0.28478100  | -0.27632300 | 1.25129200  |
| C  | 0.33797300  | 2.33097600  | 2.35538800  |
| H  | 2.44667400  | 2.14061600  | 2.43230600  |
| C  | -0.96102800 | 0.33623100  | 1.65554600  |
| H  | 0.25894400  | -1.34903700 | 1.09581300  |
| C  | -0.97490100 | 1.73111600  | 2.06798200  |
| O  | -2.00599300 | 2.44044700  | 2.16072700  |
| Ir | 0.19880200  | 0.23233500  | -1.21406700 |
| H  | 0.31593900  | 3.36504800  | 2.68295500  |
| C  | -2.14070300 | -0.53833800 | 1.69163100  |
| O  | -2.08705200 | -1.75310800 | 1.50061900  |
| O  | -3.29143900 | 0.07910500  | 2.03745600  |
| C  | -4.38455200 | -0.78655100 | 2.34718700  |
| H  | -4.54920500 | -1.52015800 | 1.55736000  |
| H  | -4.19642500 | -1.31669400 | 3.28788600  |
| H  | -5.25195900 | -0.13363700 | 2.45405200  |
| C  | -2.46318100 | -4.74349100 | -1.50773700 |
| C  | -3.00883400 | -4.85902700 | -0.06852000 |
| H  | -2.15965000 | -5.73371900 | -1.86758300 |
| H  | -3.26704000 | -4.41185200 | -2.17824200 |
| H  | -3.90960100 | -5.48340800 | -0.03627100 |
| H  | -2.25555600 | -5.30823200 | 0.58863800  |
| H  | -3.24011600 | -3.87062900 | 0.34220200  |
| C  | 0.70940800  | -5.40985600 | -1.43401800 |
| C  | 1.15657000  | -5.77361200 | -0.00531900 |
| H  | 1.58207600  | -5.42876400 | -2.10118000 |
| H  | 0.02729800  | -6.18238400 | -1.80740400 |

|   |             |             |             |
|---|-------------|-------------|-------------|
| H | 1.63593500  | -6.75904800 | 0.02146000  |
| H | 1.86740700  | -5.03376700 | 0.37642900  |
| H | 0.29894000  | -5.78661800 | 0.67650200  |
| C | 5.19100600  | -2.38887200 | -1.15194200 |
| C | 5.24429100  | -3.04168900 | 0.24368400  |
| H | 6.19333200  | -2.03904400 | -1.42496300 |
| H | 4.92274400  | -3.14956100 | -1.89702800 |
| H | 5.93724200  | -3.89071500 | 0.25781300  |
| H | 5.57667100  | -2.31633600 | 0.99507500  |
| H | 4.25395500  | -3.39917800 | 0.54622200  |
| C | 5.79748800  | 0.78156900  | -0.90324500 |
| C | 6.03907900  | 1.12613200  | 0.58031500  |
| H | 5.85082900  | 1.69980300  | -1.50288200 |
| H | 6.61054200  | 0.13912600  | -1.26088800 |
| H | 7.00008700  | 1.63482400  | 0.71787900  |
| H | 5.24713600  | 1.77946900  | 0.96392900  |
| H | 6.04087500  | 0.21633600  | 1.19115600  |
| C | 2.76831600  | 5.18453800  | -0.31495200 |
| C | 3.36079000  | 5.03463400  | 1.10039600  |
| H | 2.42083500  | 6.21511000  | -0.45161000 |
| H | 3.56194000  | 5.03131200  | -1.05869200 |
| H | 4.18599700  | 5.73801700  | 1.26094700  |
| H | 2.59391300  | 5.22278600  | 1.85977600  |
| H | 3.74041800  | 4.01899800  | 1.26007400  |
| C | -0.41998400 | 5.74160700  | -0.10316100 |
| C | -0.83894200 | 5.76721500  | 1.38144500  |
| H | -1.31041600 | 5.86820800  | -0.73309400 |
| H | 0.22517400  | 6.60183700  | -0.31785800 |
| H | -1.42008000 | 6.66909600  | 1.60685600  |
| H | -1.43541200 | 4.88632300  | 1.64267700  |
| H | 0.04814300  | 5.76697800  | 2.02599900  |
| C | -4.86837900 | 2.78516100  | -0.86219900 |
| C | -5.18344700 | 2.84030100  | 0.64826500  |
| H | -5.79276000 | 2.62048800  | -1.42947000 |
| H | -4.47977200 | 3.75722100  | -1.19160400 |
| H | -5.82672600 | 3.69658300  | 0.88345400  |
| H | -5.70285100 | 1.92598800  | 0.95759900  |
| H | -4.26320500 | 2.90256000  | 1.23725800  |
| C | -5.43334500 | -0.23993500 | -1.88339200 |
| C | -6.10572800 | -1.05601500 | -0.76567900 |
| H | -5.28210400 | -0.88872200 | -2.75667400 |
| H | -6.12425000 | 0.54619800  | -2.21015400 |
| H | -7.06024600 | -1.47087300 | -1.10985900 |
| H | -5.47045600 | -1.88888000 | -0.44612200 |

|   |             |             |            |
|---|-------------|-------------|------------|
| H | -6.29969800 | -0.42882500 | 0.10986000 |
| C | 0.69151000  | -0.93165800 | 4.17110900 |
| C | 1.93748900  | -0.78590800 | 3.41866100 |
| C | 2.50650100  | -2.02039400 | 2.87996000 |
| C | 1.78491500  | -3.15335200 | 2.79679400 |
| C | 0.37720000  | -3.25136500 | 3.31384000 |
| C | -0.06361500 | -2.04801600 | 4.11478200 |
| H | 2.43185100  | -0.04140800 | 1.25967700 |
| H | 3.52081700  | -1.98794800 | 2.48841800 |
| H | -0.32694300 | -3.38302700 | 2.47405800 |
| H | 2.65938100  | -0.08142700 | 3.83200800 |
| H | 0.33709800  | -0.06765700 | 4.72945300 |
| H | 0.26336100  | -4.16687700 | 3.92036400 |
| H | 2.22226100  | -4.04981300 | 2.36397500 |
| C | -1.39503500 | -2.16795900 | 4.79952000 |
| H | -2.17251000 | -2.39756800 | 4.05925800 |
| H | -1.39670700 | -2.98795200 | 5.53212000 |
| H | -1.67334300 | -1.24368200 | 5.31657600 |

## 10

|   |             |             |             |
|---|-------------|-------------|-------------|
| C | 1.06932400  | 1.48533100  | -1.09491200 |
| C | 0.67627900  | 2.69455200  | -0.30573000 |
| C | 0.00178700  | 0.44742800  | -1.14960500 |
| C | -0.43793600 | 2.74155800  | 0.43963700  |
| H | 1.36936000  | 3.53476300  | -0.31689000 |
| C | -1.11210600 | 0.46591300  | -0.39372500 |
| H | 0.19447400  | -0.42036100 | -1.77362000 |
| C | -1.38838200 | 1.60767500  | 0.52780500  |
| O | -2.31238800 | 1.61823000  | 1.33236800  |
| H | -0.69311200 | 3.60499500  | 1.04763600  |
| C | -1.99741900 | -0.73845500 | -0.45856300 |
| O | -1.58159800 | -1.86568500 | -0.66971600 |
| O | -3.29515500 | -0.44667000 | -0.29610600 |
| C | -4.18738900 | -1.57189200 | -0.32940800 |
| H | -4.14090300 | -2.07216400 | -1.30135300 |
| H | -3.92474600 | -2.29149500 | 0.45124700  |
| H | -5.18097500 | -1.15904400 | -0.15394000 |
| C | 2.13300700  | 0.32787500  | 0.92040500  |
| C | 2.39762400  | 0.82262400  | -0.47857900 |
| C | 2.89071300  | -0.27626200 | -1.38619400 |
| C | 2.69426300  | -1.56727800 | -1.10779900 |
| C | 1.99787200  | -2.02808200 | 0.14531300  |
| C | 1.91614300  | -0.95942300 | 1.21338700  |
| H | 1.34108300  | 1.78609700  | -2.11896500 |

|   |            |             |             |
|---|------------|-------------|-------------|
| H | 3.38201100 | 0.02530900  | -2.30993100 |
| H | 0.97282800 | -2.35614200 | -0.10172500 |
| H | 3.13478700 | 1.63836200  | -0.45531400 |
| H | 2.04174000 | 1.08383600  | 1.69723000  |
| H | 2.49903100 | -2.92134000 | 0.54771800  |
| H | 3.03374200 | -2.33473200 | -1.80093400 |
| C | 1.54144500 | -1.42966400 | 2.59227300  |
| H | 0.56733300 | -1.93767300 | 2.57128600  |
| H | 2.26898100 | -2.15845400 | 2.97560300  |
| H | 1.47614300 | -0.60034800 | 3.30375500  |

**11**

|   |             |             |             |
|---|-------------|-------------|-------------|
| C | 2.40198100  | -1.30561600 | 0.12894500  |
| C | 3.03041500  | -0.04376400 | 0.10991200  |
| C | 1.00191100  | -1.40970200 | 0.05358300  |
| C | 2.26583800  | 1.09643000  | 0.00748700  |
| H | 4.11334200  | 0.02176400  | 0.17079300  |
| C | 0.19448100  | -0.28699000 | -0.03270000 |
| H | 0.52515100  | -2.38476800 | 0.06498900  |
| C | 0.81202300  | 1.04523400  | -0.08638800 |
| O | 0.16493900  | 2.10655200  | -0.23696000 |
| H | 2.70678000  | 2.08768700  | -0.02790700 |
| C | -1.28128600 | -0.53237100 | -0.08308200 |
| O | -1.75864100 | -1.61885700 | -0.36091100 |
| O | -2.01783500 | 0.53930000  | 0.24061700  |
| C | -3.43949600 | 0.33388800  | 0.20822300  |
| H | -3.76086200 | 0.03263100  | -0.79292000 |
| H | -3.73266200 | -0.44250700 | 0.92121100  |
| H | -3.87559200 | 1.29500900  | 0.48095600  |
| H | 3.00092900  | -2.20843000 | 0.20502800  |

**CSS<sup>TS8</sup>**

|   |             |             |             |
|---|-------------|-------------|-------------|
| C | 2.80540500  | 1.33977400  | -0.17757700 |
| C | 2.38473400  | 2.72335200  | -0.24627300 |
| C | 2.16168200  | 0.54181300  | 0.80972200  |
| C | 1.26531700  | 3.15058800  | 0.39492300  |
| H | 2.94434800  | 3.40169700  | -0.88888400 |
| C | 0.97755500  | 0.91169200  | 1.41866800  |
| H | 2.54717200  | -0.45415100 | 0.99876900  |
| C | 0.41079700  | 2.25526700  | 1.18523900  |
| O | -0.71223200 | 2.63723300  | 1.55425900  |
| H | 0.89824300  | 4.16716300  | 0.28752900  |
| C | 0.31199800  | -0.16461600 | 2.19623700  |
| O | 0.85491400  | -1.21685600 | 2.50495500  |

|   |             |             |             |
|---|-------------|-------------|-------------|
| O | -0.99072700 | 0.06922800  | 2.46171000  |
| C | -1.69059400 | -1.03707300 | 3.05455200  |
| H | -1.63302700 | -1.91376800 | 2.40230100  |
| H | -1.26683900 | -1.28742600 | 4.03105200  |
| H | -2.72321200 | -0.69931900 | 3.15828100  |
| C | 5.24226500  | 1.18469600  | 0.37152400  |
| C | 4.19892000  | 0.94632500  | -0.69637400 |
| C | 4.23835500  | -0.46682700 | -1.23024500 |
| C | 5.09940700  | -1.41078000 | -0.83064100 |
| C | 6.12571100  | -1.15103000 | 0.24784200  |
| C | 6.08689000  | 0.24660400  | 0.80196700  |
| H | 1.83776100  | 0.85212500  | -1.20389700 |
| H | 3.50312900  | -0.70156800 | -1.99903900 |
| H | 5.98934600  | -1.88149700 | 1.06330500  |
| H | 6.79867800  | 0.47933600  | 1.59234700  |
| H | 4.40446900  | 1.62779300  | -1.54035900 |
| H | 5.25563900  | 2.18040600  | 0.81161100  |
| H | 7.13314300  | -1.36881400 | -0.14640000 |
| C | 5.12598300  | -2.79090000 | -1.43535200 |
| H | 4.97236300  | -3.56488200 | -0.66976300 |
| H | 4.35974000  | -2.91534400 | -2.20756800 |
| H | 6.10431600  | -2.99727900 | -1.89173900 |
| C | -2.83340600 | 1.30700500  | -0.29969500 |
| C | -2.11653700 | 2.31632100  | -1.13050800 |
| C | -2.15073700 | -0.00999000 | -0.27556000 |
| C | -0.92207100 | 2.06541700  | -1.70632400 |
| H | -2.58554400 | 3.29069300  | -1.24534300 |
| C | -0.92858500 | -0.26002000 | -0.80691200 |
| H | -2.66647900 | -0.82219200 | 0.22483800  |
| C | -0.21932400 | 0.81718700  | -1.49429300 |
| O | 0.97096600  | 0.69869800  | -1.97295900 |
| H | -0.38643400 | 2.81620700  | -2.27723400 |
| C | -0.38450400 | -1.63523700 | -0.55054500 |
| O | -1.07808500 | -2.55127400 | -0.14597600 |
| O | 0.93648500  | -1.73527800 | -0.73968200 |
| C | 1.53108100  | -2.95465200 | -0.25014200 |
| H | 1.31606900  | -3.05545100 | 0.81613500  |
| H | 1.14164300  | -3.81730200 | -0.79690200 |
| H | 2.59860400  | -2.82882600 | -0.41932400 |
| C | -4.49422100 | 0.48951000  | -2.03175600 |
| C | -4.35847200 | 1.14508700  | -0.68095700 |
| C | -5.07615600 | 0.38655400  | 0.40535500  |
| C | -5.59676400 | -0.83778100 | 0.25793300  |
| C | -5.54956700 | -1.56211500 | -1.06833800 |

|   |             |             |             |
|---|-------------|-------------|-------------|
| C | -5.00944200 | -0.72943000 | -2.19909200 |
| H | -2.80171200 | 1.68135900  | 0.73799100  |
| H | -5.12234100 | 0.87769700  | 1.37738800  |
| H | -4.94362900 | -2.47791000 | -0.96055900 |
| H | -5.04949500 | -1.16997800 | -3.19367200 |
| H | -4.75771200 | 2.17072400  | -0.72594300 |
| H | -4.10063500 | 1.04153400  | -2.88337400 |
| H | -6.55829800 | -1.92757300 | -1.32145000 |
| C | -6.26042100 | -1.57773600 | 1.38869400  |
| H | -5.75904200 | -2.53791100 | 1.57340300  |
| H | -6.24647400 | -1.00113300 | 2.31922100  |
| H | -7.30615900 | -1.81244200 | 1.14639600  |

**CSST9**

|   |             |             |             |
|---|-------------|-------------|-------------|
| N | 0.22563900  | -1.85505300 | -1.25528200 |
| N | 1.05417200  | 0.92127700  | -1.52945300 |
| N | -1.64683800 | 1.77280900  | -0.88241100 |
| N | -2.48381100 | -0.99867500 | -0.64197900 |
| C | -0.35198200 | -3.09049700 | -1.10030600 |
| C | 0.66107600  | -4.12340500 | -1.24191400 |
| C | 1.84546600  | -3.48214400 | -1.50058500 |
| C | 1.55479500  | -2.05735100 | -1.53117800 |
| C | 2.47628000  | -1.05290000 | -1.81741100 |
| C | 2.24981500  | 0.31901500  | -1.83416100 |
| C | 3.23558500  | 1.33661000  | -2.17146100 |
| C | 2.60328000  | 2.54773200  | -2.06380200 |
| C | 1.23102800  | 2.27294200  | -1.66713200 |
| C | 0.24465000  | 3.23294800  | -1.45870400 |
| C | -1.07677600 | 3.00893600  | -1.08027000 |
| C | -2.05081300 | 4.04299200  | -0.78417700 |
| C | -3.20981400 | 3.40349600  | -0.41286100 |
| C | -2.95080800 | 1.97866500  | -0.49583900 |
| C | -3.87597200 | 0.97396600  | -0.22338200 |
| C | -3.66840400 | -0.40052900 | -0.29906000 |
| C | -4.66136900 | -1.42243600 | -0.00568200 |
| C | -4.04864800 | -2.63430600 | -0.19570100 |
| C | -2.67907000 | -2.35455500 | -0.59646000 |
| C | -1.69804400 | -3.31426900 | -0.82910600 |
| H | 0.53828800  | 4.26752800  | -1.59871400 |
| H | 3.48369600  | -1.37769100 | -2.04809300 |
| H | -2.00826300 | -4.35014200 | -0.75702300 |
| H | -4.86969600 | 1.29798800  | 0.06543300  |
| C | -1.14030000 | -0.10424100 | -3.11624100 |
| H | -0.24072700 | -0.40359800 | -3.66578600 |



|    |             |             |             |
|----|-------------|-------------|-------------|
| H  | -1.94272300 | -0.82493600 | -3.31027300 |
| H  | -1.45422600 | 0.88979300  | -3.45553300 |
| C  | -0.22587500 | -0.13107500 | 1.14450400  |
| C  | -0.94606700 | -1.14201900 | 1.89444600  |
| C  | 1.19720100  | -0.11522000 | 1.30287000  |
| C  | -0.29542700 | -2.28385400 | 2.22966800  |
| H  | -2.02220600 | -1.05148900 | 2.00998300  |
| C  | 1.89790100  | -1.22905100 | 1.66429200  |
| H  | 1.74928200  | 0.77809400  | 1.03769600  |
| C  | 1.15816300  | -2.46078600 | 2.03260700  |
| O  | 1.68644200  | -3.56619900 | 2.18223500  |
| Ir | -0.71121300 | -0.04055300 | -1.05749300 |
| H  | -0.82371200 | -3.15700400 | 2.60151900  |
| C  | 3.37466600  | -1.08804700 | 1.70338900  |
| O  | 3.98013200  | -0.16542000 | 1.17637700  |
| O  | 3.98843900  | -2.03892100 | 2.42800300  |
| C  | 5.41363300  | -1.91239300 | 2.51620100  |
| H  | 5.86797100  | -1.99015100 | 1.52392300  |
| H  | 5.69093400  | -0.95052500 | 2.95784700  |
| H  | 5.73845800  | -2.73833400 | 3.14969900  |
| C  | 4.66779300  | 1.08088400  | -2.54758200 |
| C  | 5.64089100  | 1.19686100  | -1.35871700 |
| H  | 4.96685700  | 1.79031700  | -3.33030200 |
| H  | 4.76211300  | 0.08561300  | -2.99826500 |
| H  | 6.66773800  | 0.97872900  | -1.67657600 |
| H  | 5.62321000  | 2.21235900  | -0.94625200 |
| H  | 5.36120900  | 0.51250900  | -0.55425900 |
| C  | 3.17650400  | 3.91800600  | -2.28580500 |
| C  | 3.49325600  | 4.66834300  | -0.97754700 |
| H  | 2.48068900  | 4.52059600  | -2.88537800 |
| H  | 4.09468500  | 3.83507800  | -2.87901200 |
| H  | 3.91492600  | 5.65896500  | -1.18379800 |
| H  | 2.59054400  | 4.80391700  | -0.37154200 |
| H  | 4.21438100  | 4.10675600  | -0.37447300 |
| C  | -1.77596300 | 5.51926100  | -0.82132500 |
| C  | -1.05465600 | 6.02717800  | 0.44227400  |
| H  | -2.71934600 | 6.06529300  | -0.93880400 |
| H  | -1.17329700 | 5.76485500  | -1.70538000 |
| H  | -0.87214000 | 7.10654300  | 0.38676500  |
| H  | -1.65433900 | 5.82625600  | 1.33736000  |
| H  | -0.08987200 | 5.52504400  | 0.57292700  |
| C  | -4.49528200 | 4.01172500  | 0.06807900  |
| C  | -4.62815900 | 3.96694900  | 1.60327000  |
| H  | -5.34935700 | 3.49096700  | -0.38437400 |

|   |             |             |             |
|---|-------------|-------------|-------------|
| H | -4.56158300 | 5.05262200  | -0.26921500 |
| H | -5.57704800 | 4.40594200  | 1.93228200  |
| H | -4.58295000 | 2.93435200  | 1.96753500  |
| H | -3.81018600 | 4.52170800  | 2.07711400  |
| C | -6.05233000 | -1.14549400 | 0.48653500  |
| C | -6.08847200 | -0.78618900 | 1.98510900  |
| H | -6.68709600 | -2.02191200 | 0.31122300  |
| H | -6.49944100 | -0.32676300 | -0.09288300 |
| H | -7.11168600 | -0.57778300 | 2.31869200  |
| H | -5.69160600 | -1.61055700 | 2.58846100  |
| H | -5.47454100 | 0.09863800  | 2.18874000  |
| C | -4.59942800 | -4.00855900 | 0.05235500  |
| C | -4.16688700 | -4.57539400 | 1.41941000  |
| H | -4.27495600 | -4.69267500 | -0.74259900 |
| H | -5.69437200 | -3.98347200 | 0.00205700  |
| H | -4.56633700 | -5.58420700 | 1.57465800  |
| H | -3.07467200 | -4.62403900 | 1.49353400  |
| H | -4.52583700 | -3.93456400 | 2.23288800  |
| C | 0.41042200  | -5.59150700 | -1.04822300 |
| C | 0.20107500  | -5.98143600 | 0.42903700  |
| H | 1.25556600  | -6.15980400 | -1.45290300 |
| H | -0.46679700 | -5.89830900 | -1.63513300 |
| H | 0.07519600  | -7.06614200 | 0.52819000  |
| H | 1.04559400  | -5.65760200 | 1.04237800  |
| H | -0.69108600 | -5.49625100 | 0.84031400  |
| C | 3.21897400  | -4.07429300 | -1.63170900 |
| C | 4.10755700  | -3.78242300 | -0.40453300 |
| H | 3.70986800  | -3.69406500 | -2.53870000 |
| H | 3.13358700  | -5.15839800 | -1.76541900 |
| H | 5.05567700  | -4.32920400 | -0.47303400 |
| H | 4.33839800  | -2.71403400 | -0.33811500 |
| H | 3.59741100  | -4.06058100 | 0.52239300  |
| C | 3.25358800  | 2.48856700  | 3.69419000  |
| C | 2.88849500  | 3.22124900  | 2.43135200  |
| C | 1.43548800  | 3.10836200  | 2.07916500  |
| C | 0.54058100  | 2.38641300  | 2.78823300  |
| C | 0.91964900  | 1.66407500  | 4.06307900  |
| C | 2.37587100  | 1.79396800  | 4.41996300  |
| H | 1.11964800  | 3.55442900  | 1.13861600  |
| H | 0.28912800  | 2.02850300  | 4.89098300  |
| H | 0.65757900  | 0.59899000  | 3.95782300  |
| C | -0.78339000 | 2.10576800  | 2.23891600  |
| H | -1.53981400 | 1.74696600  | 2.93862900  |
| H | -1.17679900 | 2.81488800  | 1.51188900  |

|   |             |            |            |
|---|-------------|------------|------------|
| H | -0.68033200 | 1.08578300 | 1.44097400 |
| H | 2.70316800  | 1.27253300 | 5.31736900 |
| H | 4.29771200  | 2.53087100 | 3.99725000 |
| H | 3.47474000  | 2.81193800 | 1.59107400 |
| H | 3.18947800  | 4.28006400 | 2.49308100 |

**<sup>3</sup>TS9**

|   |             |             |             |
|---|-------------|-------------|-------------|
| N | 0.41891400  | -1.71222400 | -1.40492700 |
| N | 0.88607900  | 1.13469700  | -1.58124000 |
| N | -1.84770800 | 1.65427800  | -0.81645000 |
| N | -2.35865400 | -1.20582800 | -0.68427100 |
| C | -0.00931900 | -3.01196300 | -1.27652900 |
| C | 1.12179600  | -3.91640700 | -1.42164500 |
| C | 2.22491700  | -3.13496400 | -1.64230500 |
| C | 1.76392700  | -1.75393600 | -1.65342200 |
| C | 2.56012200  | -0.63618800 | -1.89167200 |
| C | 2.16113200  | 0.69342900  | -1.88486600 |
| C | 3.01363200  | 1.83239600  | -2.16944000 |
| C | 2.23723400  | 2.95622800  | -2.03397800 |
| C | 0.90799500  | 2.51246500  | -1.66466200 |
| C | -0.17389300 | 3.34338100  | -1.40274400 |
| C | -1.44283700 | 2.95463300  | -0.98263700 |
| C | -2.51980300 | 3.85537700  | -0.61043800 |
| C | -3.57822400 | 3.07017500  | -0.22936400 |
| C | -3.15375100 | 1.68919100  | -0.37965300 |
| C | -3.94462400 | 0.57428000  | -0.12637200 |
| C | -3.58652500 | -0.76495800 | -0.26970500 |
| C | -4.44482200 | -1.90436000 | 0.00500300  |
| C | -3.70628900 | -3.02877000 | -0.26991200 |
| C | -2.39666500 | -2.57290400 | -0.70161200 |
| C | -1.31348600 | -3.39999300 | -0.99976300 |
| H | -0.00245100 | 4.40891100  | -1.50612200 |
| H | 3.60719700  | -0.82443500 | -2.09566400 |
| H | -1.49773500 | -4.46717400 | -0.95789800 |
| H | -4.95732300 | 0.76866400  | 0.20931900  |
| C | -1.43227100 | -0.17905200 | -3.08846000 |
| H | -0.76186900 | 0.41088600  | -3.72190900 |
| H | -1.41828800 | -1.22969400 | -3.38898900 |
| H | -2.44987100 | 0.21845200  | -3.12847600 |
| C | -0.25089000 | -0.38002200 | 1.23433700  |
| C | -0.80356900 | -1.56101500 | 1.82465600  |
| C | 1.15888700  | -0.22241900 | 1.24805000  |
| C | 0.01434600  | -2.58038400 | 2.22111600  |
| H | -1.88251600 | -1.65573800 | 1.91212000  |

|    |             |             |             |
|----|-------------|-------------|-------------|
| C  | 2.01520000  | -1.21268000 | 1.67666100  |
| H  | 1.59250500  | 0.71444700  | 0.92497300  |
| C  | 1.47420600  | -2.51594100 | 2.09452400  |
| O  | 2.17597000  | -3.52313600 | 2.30918900  |
| Ir | -0.71630600 | -0.02309600 | -1.12136300 |
| H  | -0.38293400 | -3.51054400 | 2.61821900  |
| C  | 3.45429400  | -0.85303300 | 1.71575300  |
| O  | 3.93731300  | 0.08561500  | 1.09663400  |
| O  | 4.18316500  | -1.62662700 | 2.53729400  |
| C  | 5.57174800  | -1.28331200 | 2.62127200  |
| H  | 6.05312900  | -1.38340600 | 1.64367900  |
| H  | 5.69424400  | -0.25378300 | 2.97160100  |
| H  | 6.00217300  | -1.98875900 | 3.33279300  |
| C  | 4.47479200  | 1.76540100  | -2.51217100 |
| C  | 5.39200900  | 1.91211200  | -1.28228400 |
| H  | 4.71156600  | 2.55384100  | -3.23809100 |
| H  | 4.69486200  | 0.81822800  | -3.01926100 |
| H  | 6.44571300  | 1.83196600  | -1.57546200 |
| H  | 5.24610200  | 2.89056000  | -0.81027300 |
| H  | 5.17002600  | 1.14909300  | -0.53249200 |
| C  | 2.64993500  | 4.39242400  | -2.18456600 |
| C  | 2.86720600  | 5.10860700  | -0.83676500 |
| H  | 1.89341700  | 4.93846800  | -2.76437500 |
| H  | 3.57578900  | 4.44418800  | -2.76904100 |
| H  | 3.17631900  | 6.14866000  | -0.99177900 |
| H  | 1.95037700  | 5.11227000  | -0.23738100 |
| H  | 3.64028300  | 4.60313300  | -0.24925300 |
| C  | -2.40510300 | 5.35189500  | -0.57189600 |
| C  | -1.67259000 | 5.85621900  | 0.68745600  |
| H  | -3.40523200 | 5.79912800  | -0.61034400 |
| H  | -1.87915500 | 5.71114400  | -1.46631400 |
| H  | -1.59445800 | 6.94948700  | 0.68748700  |
| H  | -2.20652800 | 5.54918700  | 1.59361100  |
| H  | -0.66103600 | 5.43996300  | 0.74810000  |
| C  | -4.90442700 | 3.49925900  | 0.32794500  |
| C  | -4.96597600 | 3.36816700  | 1.86273300  |
| H  | -5.71134400 | 2.90415100  | -0.11997800 |
| H  | -5.10382100 | 4.53959500  | 0.04609000  |
| H  | -5.94407300 | 3.67931000  | 2.24720100  |
| H  | -4.78763500 | 2.33265300  | 2.17356200  |
| H  | -4.19651300 | 3.99006500  | 2.33359700  |
| C  | -5.83622900 | -1.81321100 | 0.56130800  |
| C  | -5.84957000 | -1.52837400 | 2.07622800  |
| H  | -6.37307800 | -2.74867900 | 0.36545700  |

|   |             |             |             |
|---|-------------|-------------|-------------|
| H | -6.39819200 | -1.02677600 | 0.04000200  |
| H | -6.87515800 | -1.45668700 | 2.45632300  |
| H | -5.33543000 | -2.32674600 | 2.62313400  |
| H | -5.33337300 | -0.58828100 | 2.30155900  |
| C | -4.08505600 | -4.46711400 | -0.06647900 |
| C | -3.55261200 | -5.02826900 | 1.26739400  |
| H | -3.70388800 | -5.07769400 | -0.89532000 |
| H | -5.17629000 | -4.56982000 | -0.09201900 |
| H | -3.82308800 | -6.08331500 | 1.38931100  |
| H | -2.46122200 | -4.94550800 | 1.31802500  |
| H | -3.96590000 | -4.46738500 | 2.11330300  |
| C | 1.04623900  | -5.40669000 | -1.25063500 |
| C | 0.88449600  | -5.83836000 | 0.22115000  |
| H | 1.95330100  | -5.86424600 | -1.66147300 |
| H | 0.21221000  | -5.80746300 | -1.84389200 |
| H | 0.88894500  | -6.93144900 | 0.30544600  |
| H | 1.68326600  | -5.42749800 | 0.84443800  |
| H | -0.05956200 | -5.46930000 | 0.63685100  |
| C | 3.66162700  | -3.55749900 | -1.74984800 |
| C | 4.47449200  | -3.21911100 | -0.48230200 |
| H | 4.13125600  | -3.08349500 | -2.62330400 |
| H | 3.70680100  | -4.63717800 | -1.93077900 |
| H | 5.48124400  | -3.64943600 | -0.54275600 |
| H | 4.57696200  | -2.13568000 | -0.36461300 |
| H | 3.97969600  | -3.60003000 | 0.41711600  |
| C | 3.11483200  | 2.37194600  | 3.54483100  |
| C | 2.64594900  | 3.14042700  | 2.33929500  |
| C | 1.17264500  | 2.99876900  | 2.08419900  |
| C | 0.33295400  | 2.25786300  | 2.84312100  |
| C | 0.81851000  | 1.53184500  | 4.08047300  |
| C | 2.29953500  | 1.65441600  | 4.31990100  |
| H | 0.78905200  | 3.44835000  | 1.17062700  |
| H | 0.25869000  | 1.89229800  | 4.95972700  |
| H | 0.54809800  | 0.46712900  | 3.99343000  |
| C | -1.01836800 | 1.93752200  | 2.38748000  |
| H | -1.72558900 | 1.61047600  | 3.15378800  |
| H | -1.46301700 | 2.61260200  | 1.65883600  |
| H | -0.83608400 | 0.82445800  | 1.69017100  |
| H | 2.70044300  | 1.10709900  | 5.17131600  |
| H | 4.18075600  | 2.40776600  | 3.76227600  |
| H | 3.19054200  | 2.77967900  | 1.45049500  |
| H | 2.92467000  | 4.20401600  | 2.42897300  |

**osSTs10**

|    |             |             |             |
|----|-------------|-------------|-------------|
| N  | -1.86477700 | -0.43755900 | -1.30822600 |
| N  | 0.91331000  | -1.23439000 | -1.51445500 |
| N  | 1.73021100  | 1.48609100  | -0.99358700 |
| N  | -1.05493400 | 2.29609100  | -0.84918000 |
| C  | -3.11442500 | 0.12879000  | -1.20411200 |
| C  | -4.13007800 | -0.91185900 | -1.23845600 |
| C  | -3.46868700 | -2.10413400 | -1.36877900 |
| C  | -2.04875900 | -1.79306400 | -1.43779800 |
| C  | -1.03026600 | -2.72029000 | -1.62929600 |
| C  | 0.33591500  | -2.46936400 | -1.68305800 |
| C  | 1.36678100  | -3.46282600 | -1.93378100 |
| C  | 2.56597800  | -2.80009200 | -1.92451100 |
| C  | 2.27248200  | -1.40211300 | -1.65598200 |
| C  | 3.21647900  | -0.38693200 | -1.53974800 |
| C  | 2.97717900  | 0.94320300  | -1.20217800 |
| C  | 3.99511000  | 1.95367800  | -0.97087900 |
| C  | 3.33727600  | 3.09717100  | -0.59008700 |
| C  | 1.91701300  | 2.80147700  | -0.63421400 |
| C  | 0.89491800  | 3.71534500  | -0.39130400 |
| C  | -0.47460100 | 3.49311100  | -0.49805300 |
| C  | -1.50976800 | 4.47832800  | -0.23745800 |
| C  | -2.71284200 | 3.85658100  | -0.45712500 |
| C  | -2.41479000 | 2.48572300  | -0.83333600 |
| C  | -3.36102400 | 1.48556400  | -1.03755300 |
| H  | 4.25331900  | -0.66974800 | -1.68876700 |
| H  | -1.33556000 | -3.75306900 | -1.74864800 |
| H  | -4.40154300 | 1.78556000  | -0.99314900 |
| H  | 1.20036100  | 4.71730700  | -0.11006100 |
| C  | -0.04899800 | 0.87064500  | -3.26011800 |
| H  | 0.98513300  | 0.80042500  | -3.61279600 |
| H  | -0.66597600 | 0.11011400  | -3.74865000 |
| H  | -0.44967900 | 1.86906800  | -3.46088100 |
| C  | -0.34507500 | 0.74785600  | 1.75502300  |
| C  | -1.61335500 | 1.30579000  | 2.07636100  |
| C  | -0.20056500 | -0.65987300 | 1.68835400  |
| C  | -2.68667700 | 0.48783100  | 2.29275900  |
| H  | -1.72571000 | 2.38630600  | 2.09592900  |
| C  | -1.25281100 | -1.51534900 | 1.94499300  |
| H  | 0.76959500  | -1.08889000 | 1.46316800  |
| C  | -2.59642100 | -0.97064100 | 2.20244400  |
| O  | -3.62095500 | -1.67227300 | 2.31608800  |
| Ir | -0.07341400 | 0.53554200  | -1.22647200 |

|   |             |             |             |
|---|-------------|-------------|-------------|
| H | -3.67580600 | 0.88441600  | 2.49910000  |
| C | -0.93012600 | -2.96733100 | 1.96563600  |
| O | 0.06634700  | -3.44745500 | 1.44819900  |
| O | -1.80526000 | -3.70347500 | 2.67618800  |
| C | -1.49630700 | -5.09973200 | 2.76548800  |
| H | -1.51344900 | -5.56480700 | 1.77549200  |
| H | -0.50669300 | -5.25182500 | 3.20745200  |
| H | -2.27396100 | -5.52800000 | 3.39873700  |
| C | 1.12379800  | -4.93396600 | -2.11235200 |
| C | 1.12837800  | -5.70741400 | -0.77909900 |
| H | 1.88860000  | -5.35359400 | -2.77802800 |
| H | 0.16522300  | -5.09333700 | -2.62205400 |
| H | 0.88691800  | -6.76490900 | -0.94153000 |
| H | 2.11518700  | -5.65046200 | -0.30617600 |
| H | 0.41314000  | -5.27651700 | -0.07371200 |
| C | 3.94130400  | -3.37532900 | -2.10695400 |
| C | 4.69289100  | -3.59947700 | -0.78054500 |
| H | 4.53983600  | -2.71887800 | -2.75318900 |
| H | 3.86421200  | -4.33184800 | -2.63722400 |
| H | 5.67144400  | -4.06165300 | -0.95580600 |
| H | 4.85421900  | -2.65257400 | -0.25507000 |
| H | 4.11566900  | -4.25092700 | -0.11571200 |
| C | 5.47620000  | 1.75199300  | -1.12983600 |
| C | 6.15662000  | 1.09222900  | 0.08342000  |
| H | 5.95058000  | 2.72231300  | -1.31885100 |
| H | 5.67081200  | 1.14489400  | -2.02380400 |
| H | 7.24115700  | 1.02774200  | -0.06227900 |
| H | 5.96752100  | 1.66760900  | 0.99704800  |
| H | 5.77639600  | 0.07943200  | 0.24344300  |
| C | 3.92178500  | 4.40493600  | -0.14156300 |
| C | 3.90018200  | 4.55685900  | 1.39258300  |
| H | 3.37298000  | 5.24073000  | -0.59541800 |
| H | 4.95516600  | 4.49179200  | -0.49679900 |
| H | 4.32056400  | 5.52017500  | 1.70371600  |
| H | 2.87501300  | 4.49120200  | 1.77532800  |
| H | 4.48295800  | 3.75859200  | 1.86679200  |
| C | -1.25626700 | 5.87159100  | 0.26127600  |
| C | -0.92913400 | 5.90914700  | 1.76724200  |
| H | -2.13443000 | 6.49867000  | 0.06798500  |
| H | -0.42917000 | 6.32707700  | -0.29958500 |
| H | -0.73131600 | 6.93282200  | 2.10577400  |
| H | -1.76504100 | 5.50986000  | 2.35297600  |
| H | -0.04714000 | 5.29773100  | 1.98970500  |
| C | -4.09567000 | 4.40183200  | -0.24569500 |

|   |             |             |             |
|---|-------------|-------------|-------------|
| C | -4.67956400 | 4.00926600  | 1.12616900  |
| H | -4.76527300 | 4.04550400  | -1.03922100 |
| H | -4.07979200 | 5.49482700  | -0.33139800 |
| H | -5.69597500 | 4.39981300  | 1.25152800  |
| H | -4.71470100 | 2.91991400  | 1.23677500  |
| H | -4.05770600 | 4.40484600  | 1.93745600  |
| C | -5.60346200 | -0.67051700 | -1.07213600 |
| C | -6.00675200 | -0.32583600 | 0.37583200  |
| H | -6.15301600 | -1.56260200 | -1.39338000 |
| H | -5.92515100 | 0.13839300  | -1.74332600 |
| H | -7.09575700 | -0.23133700 | 0.46175200  |
| H | -5.65379000 | -1.08938900 | 1.07393800  |
| H | -5.55889500 | 0.62280600  | 0.69173400  |
| C | -4.03354500 | -3.49500100 | -1.35026000 |
| C | -3.71454400 | -4.24248300 | -0.03936600 |
| H | -3.64797100 | -4.07057400 | -2.20391700 |
| H | -5.12005000 | -3.44682600 | -1.48356100 |
| H | -4.22209400 | -5.21420900 | -0.01205900 |
| H | -2.63798800 | -4.41960600 | 0.05069600  |
| H | -4.01389500 | -3.65257300 | 0.83159700  |
| C | 3.45951500  | -2.33105400 | 2.66866600  |
| C | 3.96046400  | -1.02385300 | 2.11799200  |
| C | 3.17460800  | 0.16226200  | 2.58190300  |
| C | 2.16297400  | 0.09464300  | 3.51373000  |
| C | 1.82931800  | -1.21763100 | 4.20626100  |
| C | 2.50464300  | -2.41561000 | 3.59502800  |
| H | 3.37189600  | 1.11013100  | 2.08244400  |
| H | 2.09243900  | -1.14218000 | 5.27367300  |
| H | 0.73999300  | -1.36225100 | 4.18779700  |
| C | 1.33357600  | 1.19988800  | 3.75854100  |
| H | 0.52715700  | 1.15286200  | 4.48255100  |
| H | 1.56877400  | 2.17581000  | 3.34431400  |
| H | 0.46439000  | 1.39025300  | 1.43957800  |
| H | 2.16560500  | -3.39064500 | 3.93766500  |
| H | 3.90128800  | -3.23468000 | 2.25541700  |
| H | 3.91860100  | -1.04680700 | 1.01858300  |
| H | 5.03127800  | -0.89083400 | 2.35315700  |

**<sup>3</sup>TS10**

|   |             |             |             |
|---|-------------|-------------|-------------|
| N | -0.19129800 | -2.02905500 | -1.20342700 |
| N | 1.40063900  | 0.34532400  | -1.70797700 |
| N | -0.91514900 | 2.01281400  | -1.21192200 |
| N | -2.51605700 | -0.36941900 | -0.83518500 |
| C | -1.07925300 | -3.02193500 | -0.90433400 |



|    |             |             |             |
|----|-------------|-------------|-------------|
| C  | -0.38522500 | -4.30232500 | -0.82841800 |
| C  | 0.92703400  | -4.05503100 | -1.12484800 |
| C  | 1.03537900  | -2.62998300 | -1.39193500 |
| C  | 2.18750800  | -1.97631000 | -1.80414100 |
| C  | 2.36546100  | -0.60253100 | -1.95047000 |
| C  | 3.62011100  | 0.04605200  | -2.26732200 |
| C  | 3.40198500  | 1.39655000  | -2.15852200 |
| C  | 2.00126500  | 1.57154700  | -1.82214100 |
| C  | 1.36924500  | 2.79490500  | -1.63136400 |
| C  | 0.02568300  | 3.00368100  | -1.33435200 |
| C  | -0.59567400 | 4.29716100  | -1.10834000 |
| C  | -1.92570400 | 4.06182600  | -0.87111500 |
| C  | -2.11520800 | 2.62328500  | -0.94399100 |
| C  | -3.31328800 | 1.95236000  | -0.71735700 |
| C  | -3.50034800 | 0.57433500  | -0.65406200 |
| C  | -4.74859000 | -0.08510100 | -0.31919300 |
| C  | -4.50122900 | -1.43635200 | -0.31287100 |
| C  | -3.10342100 | -1.61008400 | -0.63995900 |
| C  | -2.43983900 | -2.82707700 | -0.68812200 |
| H  | 1.98739300  | 3.68017400  | -1.72809000 |
| H  | 3.05554900  | -2.59879800 | -1.98576400 |
| H  | -3.03352800 | -3.71330100 | -0.49864400 |
| H  | -4.18666500 | 2.56828200  | -0.53502400 |
| C  | -0.88373300 | -0.09383800 | -3.32899300 |
| H  | -0.30273700 | -0.92088800 | -3.74784800 |
| H  | -1.95176700 | -0.25723300 | -3.50591900 |
| H  | -0.56935300 | 0.85571200  | -3.77168500 |
| C  | -1.00633000 | 0.63615600  | 1.74009400  |
| C  | -1.78662600 | -0.48481500 | 2.25583500  |
| C  | 0.25783200  | 0.32053100  | 1.13115500  |
| C  | -1.24842700 | -1.71829900 | 2.38040100  |
| H  | -2.82131300 | -0.30249400 | 2.53864200  |
| C  | 0.92964800  | -0.89260600 | 1.51994500  |
| H  | 0.90203600  | 1.14958100  | 0.86012100  |
| C  | 0.15250700  | -2.01478000 | 2.02799200  |
| O  | 0.58815800  | -3.18047500 | 2.16417100  |
| Ir | -0.56378300 | -0.01209600 | -1.25723900 |
| H  | -1.82468200 | -2.56272000 | 2.74756600  |
| C  | 2.40044700  | -0.87853800 | 1.46066300  |
| O  | 3.05741000  | -0.01657100 | 0.88524600  |
| O  | 2.97940200  | -1.85748000 | 2.19195400  |
| C  | 4.40053800  | -1.77082600 | 2.32349200  |
| H  | 4.89505900  | -1.90837500 | 1.35925100  |
| H  | 4.68731000  | -0.79960900 | 2.73679400  |

|   |             |             |             |
|---|-------------|-------------|-------------|
| H | 4.67577000  | -2.57660700 | 3.00597400  |
| C | 4.91125300  | -0.66217700 | -2.55820200 |
| C | 5.60839800  | -1.19501100 | -1.29231300 |
| H | 5.58869900  | 0.02353200  | -3.08042600 |
| H | 4.73232900  | -1.49500000 | -3.25133700 |
| H | 6.58078900  | -1.63747800 | -1.53793300 |
| H | 5.75696100  | -0.39129900 | -0.56457500 |
| H | 4.99549200  | -1.96006400 | -0.80694500 |
| C | 4.40690400  | 2.50754000  | -2.21806000 |
| C | 4.82810300  | 2.96800000  | -0.80653700 |
| H | 4.00142600  | 3.36231100  | -2.77557900 |
| H | 5.29386400  | 2.17649000  | -2.77036200 |
| H | 5.58244200  | 3.76169500  | -0.85892800 |
| H | 3.96501900  | 3.34629300  | -0.24809900 |
| H | 5.23776600  | 2.12807500  | -0.23604200 |
| C | 0.14741200  | 5.60039900  | -1.05485100 |
| C | 0.93064900  | 5.77740000  | 0.26148400  |
| H | -0.55705500 | 6.43222500  | -1.17053600 |
| H | 0.84305800  | 5.67217800  | -1.90162800 |
| H | 1.46618000  | 6.73358900  | 0.27877700  |
| H | 0.25147000  | 5.74859900  | 1.12127600  |
| H | 1.66223400  | 4.97215900  | 0.39167100  |
| C | -2.99369300 | 5.04277200  | -0.48351000 |
| C | -3.23927300 | 5.06796300  | 1.03852800  |
| H | -3.93293600 | 4.80171300  | -0.99878000 |
| H | -2.71350000 | 6.04758400  | -0.82047300 |
| H | -4.02666500 | 5.78340300  | 1.30240500  |
| H | -3.53940300 | 4.07815400  | 1.40122700  |
| H | -2.32438000 | 5.35154000  | 1.57125300  |
| C | -6.01556900 | 0.62903100  | 0.04980800  |
| C | -5.99008100 | 1.15561400  | 1.49918300  |
| H | -6.87020100 | -0.04602200 | -0.07354700 |
| H | -6.18806500 | 1.46746900  | -0.63768400 |
| H | -6.91750300 | 1.68626500  | 1.74291300  |
| H | -5.87171300 | 0.32812600  | 2.20769100  |
| H | -5.15073300 | 1.84365900  | 1.65031400  |
| C | -5.43026000 | -2.55075400 | 0.07272600  |
| C | -5.22371400 | -3.00518700 | 1.53170700  |
| H | -5.28771400 | -3.40785100 | -0.59805200 |
| H | -6.46971900 | -2.23002300 | -0.06282900 |
| H | -5.89539000 | -3.83279000 | 1.78657000  |
| H | -4.19220500 | -3.33567100 | 1.69530000  |
| H | -5.41897100 | -2.17876800 | 2.22441500  |
| C | -1.02776800 | -5.58962500 | -0.40243500 |

|   |             |             |             |
|---|-------------|-------------|-------------|
| C | -1.36640000 | -5.62592400 | 1.10228200  |
| H | -0.35768100 | -6.42322000 | -0.64076000 |
| H | -1.94272400 | -5.76118200 | -0.98766300 |
| H | -1.75572600 | -6.61086000 | 1.38572500  |
| H | -0.48510300 | -5.39172400 | 1.70411000  |
| H | -2.12353800 | -4.87473700 | 1.35220800  |
| C | 2.09914800  | -4.98852500 | -1.04717200 |
| C | 2.96436700  | -4.71861400 | 0.20198300  |
| H | 2.71756500  | -4.90205500 | -1.95195300 |
| H | 1.73971200  | -6.02347700 | -1.02470800 |
| H | 3.75681800  | -5.47061800 | 0.29542200  |
| H | 3.43066900  | -3.72987200 | 0.14717100  |
| H | 2.34954400  | -4.71555500 | 1.10578600  |
| C | 3.62857200  | 1.53986400  | 3.97982000  |
| C | 3.11952900  | 2.59378200  | 3.03478100  |
| C | 1.62149000  | 2.66487000  | 2.98311700  |
| C | 0.78761800  | 1.81732300  | 3.63634200  |
| C | 1.32939400  | 0.70822400  | 4.51494400  |
| C | 2.82822800  | 0.69649100  | 4.63550100  |
| H | 1.19143000  | 3.42532500  | 2.33159000  |
| H | 0.87101600  | 0.77395800  | 5.51513200  |
| H | 0.98868200  | -0.26011300 | 4.11451800  |
| C | -0.63762200 | 1.83099800  | 3.39131300  |
| H | -1.27484900 | 1.34895600  | 4.13097100  |
| H | -1.05142100 | 2.75912500  | 2.99929600  |
| H | -1.57831000 | 1.43817300  | 1.28862000  |
| H | 3.25513600  | -0.06002700 | 5.29166800  |
| H | 4.70832700  | 1.47322200  | 4.10430500  |
| H | 3.49766500  | 2.37830300  | 2.02158600  |
| H | 3.54212700  | 3.57806400  | 3.29857700  |

## 12

|   |             |             |             |
|---|-------------|-------------|-------------|
| C | 0.34582700  | -0.28820300 | -0.46077700 |
| C | 0.40634600  | 1.19827600  | -0.63792500 |
| C | -1.03400200 | -0.79526600 | -0.19930500 |
| C | -0.66791600 | 1.98807700  | -0.50079600 |
| H | 1.38460800  | 1.62217900  | -0.85210300 |
| C | -2.12960700 | -0.01891800 | -0.07475400 |
| H | -1.15244900 | -1.87169500 | -0.08917500 |
| C | -2.01500000 | 1.47062700  | -0.16215000 |
| O | -2.94222500 | 2.23908900  | 0.05929000  |
| H | -0.60709500 | 3.06806400  | -0.60293400 |
| C | -3.42844600 | -0.72824600 | 0.17522400  |
| O | -3.49818500 | -1.85884600 | 0.62261500  |

|   |             |             |             |
|---|-------------|-------------|-------------|
| O | -4.49949400 | -0.01034400 | -0.19209500 |
| C | -5.76634700 | -0.65499600 | 0.01276500  |
| H | -5.83097600 | -1.57475700 | -0.57642200 |
| H | -5.90422600 | -0.90303000 | 1.06907300  |
| H | -6.51426400 | 0.06758700  | -0.31441200 |
| C | 5.52765000  | 0.02840200  | -0.21475400 |
| C | 4.87358400  | 0.84235800  | 0.86917800  |
| C | 3.42754500  | 0.48444100  | 1.08485700  |
| C | 2.76987700  | -0.46053800 | 0.40167500  |
| C | 3.44268300  | -1.27635800 | -0.68146700 |
| C | 4.88808400  | -0.91716200 | -0.90491200 |
| H | 2.90169200  | 1.04219800  | 1.85942600  |
| H | 3.35632700  | -2.34846200 | -0.43465800 |
| H | 2.89146400  | -1.17270900 | -1.63162100 |
| C | 1.31698200  | -0.76817100 | 0.67572300  |
| H | 1.18235800  | -1.85314300 | 0.79111300  |
| H | 0.99509400  | -0.30091400 | 1.61269300  |
| H | 0.69703600  | -0.76528700 | -1.39183800 |
| H | 5.41291900  | -1.47619200 | -1.67770900 |
| H | 6.57446600  | 0.24034600  | -0.42516400 |
| H | 4.95910900  | 1.91689300  | 0.63549200  |
| H | 5.42961300  | 0.72378700  | 1.81427400  |

### CSS TS11

|   |             |             |             |
|---|-------------|-------------|-------------|
| C | 2.35704400  | 1.28822300  | -0.75931200 |
| C | 1.98390800  | 0.18184400  | -1.61679900 |
| C | 1.34454500  | 2.26748800  | -0.54367000 |
| C | 0.69398500  | -0.02346200 | -1.99450300 |
| H | 2.76346300  | -0.51585300 | -1.91263600 |
| C | 0.00626100  | 2.04873600  | -0.82328500 |
| H | 1.60236300  | 3.17623600  | -0.00479800 |
| C | -0.40561600 | 0.81883800  | -1.52413800 |
| O | -1.58097900 | 0.42366700  | -1.65146000 |
| H | 0.39951800  | -0.89403700 | -2.57259300 |
| C | -0.92900800 | 3.08594900  | -0.31829200 |
| O | -0.58362300 | 4.07347600  | 0.31106500  |
| O | -2.23501300 | 2.84164800  | -0.59276600 |
| C | -3.15004800 | 3.82802600  | -0.10010400 |
| H | -3.07858700 | 3.91680400  | 0.98893000  |
| H | -2.94396300 | 4.80742600  | -0.54137600 |
| H | -4.14000100 | 3.47504700  | -0.39376300 |
| H | 2.02762000  | 0.70664500  | 0.57590600  |
| C | -2.47115800 | 0.12365300  | 1.34280200  |
| C | -1.56041500 | -0.93569700 | 0.83577300  |

|   |             |             |             |
|---|-------------|-------------|-------------|
| C | -1.83695500 | 1.01139100  | 2.36121300  |
| C | -0.21167400 | -0.91301500 | 1.01769600  |
| H | -1.99364200 | -1.74091600 | 0.25172600  |
| C | -0.50051000 | 1.06261300  | 2.51850200  |
| H | -2.48277200 | 1.69808100  | 2.90429200  |
| C | 0.37257800  | 0.21745200  | 1.71911500  |
| O | 1.61641000  | 0.52804800  | 1.67546600  |
| H | -2.60986400 | 0.78153800  | 0.46240400  |
| H | -0.01225600 | 1.78807400  | 3.16073200  |
| C | 0.57821300  | -2.02792700 | 0.40012500  |
| O | 0.07057700  | -2.91400000 | -0.25712300 |
| O | 1.89614000  | -1.96686800 | 0.66788500  |
| C | 2.69607600  | -2.98280800 | 0.03514400  |
| H | 2.56396400  | -2.94048900 | -1.04959100 |
| H | 3.72637000  | -2.75391400 | 0.30730500  |
| H | 2.40360500  | -3.97470100 | 0.39005400  |
| C | 6.50741500  | -1.68037400 | 0.22079800  |
| C | 6.47791500  | -1.15246000 | -1.18893800 |
| C | 5.53309000  | 0.00762200  | -1.36401600 |
| C | 4.77340400  | 0.52490200  | -0.39007100 |
| C | 4.80139400  | -0.02699300 | 1.01942700  |
| C | 5.76493000  | -1.16867300 | 1.20563100  |
| H | 5.48546200  | 0.44306500  | -2.36218300 |
| H | 5.04521400  | 0.78737200  | 1.72246700  |
| H | 3.79597600  | -0.35307400 | 1.31884300  |
| C | 3.83652500  | 1.68518200  | -0.65350500 |
| H | 3.93517100  | 2.43018900  | 0.14868500  |
| H | 4.13677900  | 2.18704100  | -1.58335300 |
| H | 5.83274100  | -1.58643900 | 2.20915600  |
| H | 7.18069700  | -2.51227100 | 0.42162900  |
| H | 6.20864300  | -1.96248400 | -1.88793500 |
| H | 7.49449000  | -0.85454900 | -1.49625900 |
| C | -6.03835500 | -2.15680700 | -1.64693100 |
| C | -5.69618500 | -3.05732800 | -0.48973400 |
| C | -4.96337400 | -2.34307400 | 0.61417500  |
| C | -4.59562200 | -1.05672000 | 0.56850500  |
| C | -4.86146500 | -0.18661500 | -0.64244500 |
| C | -5.67056400 | -0.87621200 | -1.70840700 |
| H | -4.73651800 | -2.93142600 | 1.50349600  |
| H | -5.37226400 | 0.73857000  | -0.32144300 |
| H | -3.91051300 | 0.15461300  | -1.08142500 |
| C | -3.88265800 | -0.40117400 | 1.72759100  |
| H | -4.46424200 | 0.46478100  | 2.07772600  |
| H | -3.79886300 | -1.09462400 | 2.57250600  |

|   |             |             |             |
|---|-------------|-------------|-------------|
| H | -5.93591900 | -0.27538600 | -2.57643000 |
| H | -6.60747000 | -2.59992300 | -2.46232600 |
| H | -5.09238800 | -3.91029900 | -0.84300500 |
| H | -6.61295300 | -3.51834400 | -0.08535300 |

**OSS\*TS12**

|   |             |             |             |
|---|-------------|-------------|-------------|
| N | -3.72525700 | 0.97230000  | 1.89220300  |
| N | -2.98843400 | -1.80330200 | 1.54047100  |
| N | -5.00696700 | -2.08290700 | -0.51940200 |
| N | -5.72446500 | 0.70267100  | -0.19184600 |
| C | -4.19997300 | 2.26186600  | 1.89583200  |
| C | -3.42487400 | 3.06596600  | 2.82656800  |
| C | -2.47389500 | 2.23836800  | 3.36351200  |
| C | -2.67023900 | 0.92767800  | 2.76964500  |
| C | -1.87221100 | -0.18585000 | 3.00714400  |
| C | -2.00440100 | -1.44220400 | 2.43083700  |
| C | -1.10454800 | -2.56226300 | 2.64661600  |
| C | -1.59739700 | -3.61191800 | 1.91863600  |
| C | -2.76821000 | -3.11959700 | 1.21292900  |
| C | -3.47499000 | -3.83418000 | 0.25445600  |
| C | -4.48480800 | -3.35231200 | -0.56908100 |
| C | -5.10428900 | -4.09744700 | -1.65198500 |
| C | -6.01712000 | -3.25925900 | -2.23642100 |
| C | -5.94919000 | -1.99737900 | -1.51648200 |
| C | -6.68959200 | -0.85930900 | -1.81915800 |
| C | -6.58627900 | 0.39054500  | -1.21645500 |
| C | -7.34718500 | 1.56986700  | -1.59228000 |
| C | -6.93388800 | 2.58659400  | -0.77099100 |
| C | -5.91755300 | 2.03095100  | 0.10650700  |
| C | -5.22230700 | 2.73951600  | 1.08165000  |
| H | -3.15743300 | -4.85549900 | 0.08244500  |
| H | -1.03149800 | -0.04739900 | 3.67693400  |
| H | -5.48447700 | 3.78547200  | 1.19835500  |
| H | -7.40970200 | -0.95069600 | -2.62485200 |
| C | -5.79702500 | -1.05335300 | 2.15880700  |
| H | -6.44873200 | -1.84487600 | 1.77431700  |
| H | -5.27767600 | -1.40027200 | 3.05815600  |
| H | -6.38852800 | -0.16136800 | 2.39112900  |
| C | -2.66444900 | -0.17819500 | -1.68518500 |
| C | -2.27699900 | 0.93364700  | -0.91653700 |
| C | -1.89717900 | -1.34114200 | -1.63574300 |
| C | -1.13577500 | 0.86976500  | -0.12988000 |
| H | -2.87329400 | 1.84147600  | -0.93392400 |
| C | -0.75639000 | -1.43897600 | -0.82663300 |

|    |             |             |             |
|----|-------------|-------------|-------------|
| H  | -2.18964800 | -2.21192400 | -2.21102300 |
| C  | -0.35007700 | -0.30693600 | -0.04530800 |
| O  | 0.72555000  | -0.28804300 | 0.71763500  |
| Ir | -4.40173000 | -0.57088500 | 0.72322600  |
| H  | -0.82071400 | 1.71483100  | 0.47307500  |
| C  | -0.07230200 | -2.75810700 | -0.83604200 |
| O  | -0.47181600 | -3.73048500 | -1.46061700 |
| O  | 1.06364200  | -2.81327200 | -0.09982800 |
| C  | 1.79422500  | -4.04020000 | -0.20507300 |
| H  | 1.19032700  | -4.88974400 | 0.11925400  |
| H  | 2.10827700  | -4.21308700 | -1.24035200 |
| H  | 2.66153100  | -3.91322100 | 0.44235000  |
| C  | 0.16369700  | -2.49095800 | 3.44229000  |
| C  | -0.04040800 | -2.60670000 | 4.96287100  |
| H  | 0.67092400  | -1.55258200 | 3.19187400  |
| H  | 0.84027200  | -3.28566800 | 3.10559400  |
| H  | 0.91755000  | -2.55306500 | 5.49734300  |
| H  | -0.68395100 | -1.80330000 | 5.33905800  |
| H  | -0.51833700 | -3.55851500 | 5.22108000  |
| C  | -1.06851700 | -5.01123700 | 1.81188400  |
| C  | -1.90818300 | -6.02824100 | 2.60804400  |
| H  | -0.03472000 | -5.03876300 | 2.17626200  |
| H  | -1.03153800 | -5.30776000 | 0.75569100  |
| H  | -1.50560100 | -7.04262300 | 2.50132600  |
| H  | -1.91697400 | -5.77095800 | 3.67335900  |
| H  | -2.94754100 | -6.03404600 | 2.26217100  |
| C  | -4.68590000 | -5.47416700 | -2.07945300 |
| C  | -3.38604700 | -5.45575100 | -2.91104500 |
| H  | -5.48740000 | -5.93973600 | -2.66562300 |
| H  | -4.54428700 | -6.11405600 | -1.19812400 |
| H  | -3.08602800 | -6.47288000 | -3.19077300 |
| H  | -3.53188100 | -4.87927200 | -3.83209100 |
| H  | -2.56231500 | -4.99094100 | -2.35872700 |
| C  | -6.86820500 | -3.50633900 | -3.44830700 |
| C  | -6.26868000 | -2.89245400 | -4.72888800 |
| H  | -7.87596100 | -3.09930600 | -3.28914400 |
| H  | -6.99717700 | -4.58549500 | -3.59287300 |
| H  | -6.91337400 | -3.07699600 | -5.59633000 |
| H  | -6.14152400 | -1.80951800 | -4.61947100 |
| H  | -5.28180100 | -3.32112900 | -4.93559100 |
| C  | -8.32533300 | 1.62836700  | -2.72989900 |
| C  | -7.63194300 | 1.74108600  | -4.10199900 |
| H  | -8.99761500 | 2.48407300  | -2.59523000 |
| H  | -8.96538600 | 0.73609200  | -2.72083600 |

|   |             |             |             |
|---|-------------|-------------|-------------|
| H | -8.36567600 | 1.76933500  | -4.91612700 |
| H | -7.02609400 | 2.65295800  | -4.15326100 |
| H | -6.96317100 | 0.88983100  | -4.27187400 |
| C | -7.34983600 | 4.02908300  | -0.79069400 |
| C | -6.34473900 | 4.92461600  | -1.54157300 |
| H | -7.46740600 | 4.39988200  | 0.23631800  |
| H | -8.33623500 | 4.12270400  | -1.26035300 |
| H | -6.66142700 | 5.97423400  | -1.52881600 |
| H | -5.35016900 | 4.85957300  | -1.08641300 |
| H | -6.25191000 | 4.60644800  | -2.58622300 |
| C | -3.68727200 | 4.51114100  | 3.13630400  |
| C | -4.87138000 | 4.70438400  | 4.10334200  |
| H | -3.88416800 | 5.06417400  | 2.20788300  |
| H | -2.78848100 | 4.96394600  | 3.57224600  |
| H | -5.05050000 | 5.76741300  | 4.30389600  |
| H | -5.78816100 | 4.27295900  | 3.68675400  |
| H | -4.67438200 | 4.20188900  | 5.05705700  |
| C | -1.42279700 | 2.55440800  | 4.38434400  |
| C | -1.77859100 | 2.04737700  | 5.79453800  |
| H | -1.25980300 | 3.63785500  | 4.42231300  |
| H | -0.46874900 | 2.11465600  | 4.06853800  |
| H | -0.98958600 | 2.29359900  | 6.51620800  |
| H | -2.71340100 | 2.50002200  | 6.14355100  |
| H | -1.91651800 | 0.96071000  | 5.79507400  |
| H | -3.54652300 | -0.13240500 | -2.31509300 |
| N | 5.18729500  | 0.01914800  | -1.57607700 |
| N | 4.45779600  | -1.21827000 | 0.95592400  |
| N | 3.27764900  | 1.25516900  | 1.83899500  |
| N | 3.96169100  | 2.52389600  | -0.67002600 |
| C | 5.29434000  | 0.73830900  | -2.73474000 |
| C | 5.90837000  | -0.08761400 | -3.75965400 |
| C | 6.19299300  | -1.29650400 | -3.17474000 |
| C | 5.72980800  | -1.21440600 | -1.80068400 |
| C | 5.75244100  | -2.25145000 | -0.86694800 |
| C | 5.16169300  | -2.26443300 | 0.39188100  |
| C | 5.13940700  | -3.40123800 | 1.29642200  |
| C | 4.41147800  | -3.02213300 | 2.39650900  |
| C | 4.00287500  | -1.64695100 | 2.17686100  |
| C | 3.30423000  | -0.85816400 | 3.08408500  |
| C | 2.99046400  | 0.48652600  | 2.94571500  |
| C | 2.35827500  | 1.30896600  | 3.95819300  |
| C | 2.28689800  | 2.58358000  | 3.45265500  |
| C | 2.84086400  | 2.53981400  | 2.11421300  |
| C | 2.88610200  | 3.60992700  | 1.23178500  |



|    |            |             |             |
|----|------------|-------------|-------------|
| C  | 3.37177600 | 3.60154500  | -0.07556100 |
| C  | 3.28063000 | 4.69892300  | -1.02465100 |
| C  | 3.83467500 | 4.25133300  | -2.19619300 |
| C  | 4.27092100 | 2.88449000  | -1.95989200 |
| C  | 4.87440400 | 2.05814400  | -2.90160000 |
| H  | 3.00277100 | -1.33403500 | 4.00917800  |
| H  | 6.24535400 | -3.16650500 | -1.17612500 |
| H  | 5.03945400 | 2.49108800  | -3.88135300 |
| H  | 2.46872000 | 4.54532900  | 1.58598400  |
| C  | 6.14067000 | 1.28211900  | 0.64440400  |
| H  | 6.77718600 | 0.40066500  | 0.76020700  |
| H  | 6.53264200 | 1.93720400  | -0.13532800 |
| H  | 6.05088600 | 1.82910200  | 1.58920100  |
| C  | 2.47986200 | 0.11018400  | -1.06544100 |
| C  | 1.69792300 | 1.19534500  | -1.64683500 |
| C  | 2.61249100 | -1.07823900 | -1.90657400 |
| C  | 1.12051700 | 1.13125100  | -2.87284100 |
| H  | 1.46344100 | 2.04348500  | -1.01471400 |
| C  | 2.13733000 | -1.13749200 | -3.17026400 |
| H  | 3.12610500 | -1.93075000 | -1.48183700 |
| C  | 1.43794700 | 0.00340200  | -3.78816000 |
| O  | 1.18372600 | 0.02672900  | -4.99166600 |
| Ir | 4.17373800 | 0.63116200  | 0.14535700  |
| C  | 5.83485500 | -4.70774300 | 1.04475800  |
| C  | 7.34908100 | -4.63725800 | 1.32186500  |
| H  | 5.66905400 | -5.02542800 | 0.00655400  |
| H  | 5.38840700 | -5.48697400 | 1.67311200  |
| H  | 7.83087200 | -5.60071200 | 1.12053200  |
| H  | 7.82685900 | -3.87597300 | 0.69544500  |
| H  | 7.53687500 | -4.37037200 | 2.36776600  |
| C  | 4.11440300 | -3.80930600 | 3.63990100  |
| C  | 5.06213000 | -3.46371100 | 4.80515700  |
| H  | 4.18705200 | -4.88113500 | 3.42203700  |
| H  | 3.07630700 | -3.63348100 | 3.95048200  |
| H  | 4.81254500 | -4.04604100 | 5.69923700  |
| H  | 6.10194400 | -3.67743700 | 4.53387700  |
| H  | 4.99930700 | -2.39992000 | 5.06013700  |
| C  | 1.94734900 | 0.81855600  | 5.31614400  |
| C  | 3.13491000 | 0.68030600  | 6.28854400  |
| H  | 1.43800800 | -0.14858700 | 5.22154500  |
| H  | 1.20933100 | 1.50405400  | 5.74569400  |
| H  | 2.79971800 | 0.31037200  | 7.26400500  |
| H  | 3.88638700 | -0.01478000 | 5.89787000  |
| H  | 3.62644900 | 1.64815100  | 6.43778600  |

|   |             |             |             |
|---|-------------|-------------|-------------|
| C | 1.82458300  | 3.83596100  | 4.13955700  |
| C | 2.99858000  | 4.72405300  | 4.59611200  |
| H | 1.21510800  | 3.57385400  | 5.00992300  |
| H | 1.16641900  | 4.40896000  | 3.47303200  |
| H | 2.63279900  | 5.63255100  | 5.08778500  |
| H | 3.63675200  | 4.18345300  | 5.30406700  |
| H | 3.62393700  | 5.02084300  | 3.74731400  |
| C | 2.59656900  | 6.00578800  | -0.74695700 |
| C | 1.05888300  | 5.87997600  | -0.74298000 |
| H | 2.89731600  | 6.74093300  | -1.50210100 |
| H | 2.93525000  | 6.40786100  | 0.21820000  |
| H | 0.59177200  | 6.85766600  | -0.57642800 |
| H | 0.69882200  | 5.46560400  | -1.68787400 |
| H | 0.72260500  | 5.20135600  | 0.04880900  |
| C | 3.91323500  | 4.94890100  | -3.52312600 |
| C | 2.83631100  | 4.46050000  | -4.51352700 |
| H | 4.90966700  | 4.80461500  | -3.96264600 |
| H | 3.80296900  | 6.02904800  | -3.37416800 |
| H | 2.91455700  | 4.99692000  | -5.46611700 |
| H | 2.94212800  | 3.38857900  | -4.71546800 |
| H | 1.83525900  | 4.60954600  | -4.10059500 |
| C | 6.05392400  | 0.31304600  | -5.19862800 |
| C | 4.71682700  | 0.22268600  | -5.96320200 |
| H | 6.79661400  | -0.32855000 | -5.68687100 |
| H | 6.44573200  | 1.33663000  | -5.26791000 |
| H | 4.84370200  | 0.52090500  | -7.00993200 |
| H | 4.32404900  | -0.79932700 | -5.94224700 |
| H | 3.95295400  | 0.86515600  | -5.51361200 |
| C | 6.73927200  | -2.53833900 | -3.81660400 |
| C | 5.62462700  | -3.52907200 | -4.20859300 |
| H | 7.44641200  | -3.03431400 | -3.13839800 |
| H | 7.31498900  | -2.26918900 | -4.70953700 |
| H | 6.04160900  | -4.43232300 | -4.66822300 |
| H | 5.04171400  | -3.82795200 | -3.32995200 |
| H | 4.93288200  | -3.06743500 | -4.92160600 |
| H | 1.82404900  | -0.16668700 | 0.02175100  |
| H | 2.27260900  | -2.00969200 | -3.80323400 |
| C | 0.12280100  | 2.18328000  | -3.21939500 |
| O | 0.15571500  | 3.32588800  | -2.79490700 |
| O | -0.87044200 | 1.70325700  | -3.98159100 |
| C | -1.94333200 | 2.61961300  | -4.24240100 |
| H | -1.57393200 | 3.50797500  | -4.76265500 |
| H | -2.64796700 | 2.07021500  | -4.86680900 |
| H | -2.41663900 | 2.92424500  | -3.30437700 |

OSST<sup>S</sup>TS14

|    |             |             |             |
|----|-------------|-------------|-------------|
| N  | 2.78631200  | 0.48439900  | -0.33004000 |
| N  | 0.56239100  | 2.10558600  | -1.32861500 |
| N  | -0.87212400 | -0.32428900 | -2.01716000 |
| N  | 1.32432000  | -1.92186400 | -1.04558700 |
| C  | 3.71449500  | -0.43223100 | 0.07503000  |
| C  | 4.86755500  | 0.25401800  | 0.63486100  |
| C  | 4.60596900  | 1.59709900  | 0.54618300  |
| C  | 3.29309300  | 1.72907700  | -0.06657200 |
| C  | 2.64626700  | 2.93329400  | -0.33467000 |
| C  | 1.38332100  | 3.11230800  | -0.89263300 |
| C  | 0.71545400  | 4.39305700  | -1.07013400 |
| C  | -0.51514700 | 4.12520200  | -1.61134600 |
| C  | -0.59035100 | 2.68332000  | -1.78000300 |
| C  | -1.69528700 | 1.98116200  | -2.26033600 |
| C  | -1.83614400 | 0.60269100  | -2.35519800 |
| C  | -3.02615100 | -0.08377500 | -2.82315200 |
| C  | -2.74579200 | -1.42622800 | -2.80666200 |
| C  | -1.39607000 | -1.56695000 | -2.28814200 |
| C  | -0.74685600 | -2.77246900 | -2.04801600 |
| C  | 0.49928900  | -2.94297000 | -1.45433300 |
| C  | 1.12030100  | -4.22114100 | -1.15497100 |
| C  | 2.33058300  | -3.94877400 | -0.57038100 |
| C  | 2.45824100  | -2.50378900 | -0.51748100 |
| C  | 3.55671800  | -1.81520100 | -0.01642300 |
| H  | -2.55265200 | 2.57467200  | -2.55496500 |
| H  | 3.18072100  | 3.83589400  | -0.05987600 |
| H  | 4.37852800  | -2.41985100 | 0.35053700  |
| H  | -1.28219200 | -3.67453000 | -2.32261800 |
| C  | 2.01574600  | 0.35393000  | -3.04889000 |
| H  | 2.60315200  | 1.27280200  | -3.00444000 |
| H  | 2.66441200  | -0.51745900 | -3.17844100 |
| H  | 1.25931600  | 0.41360300  | -3.83728900 |
| C  | 0.17861100  | 0.27006700  | 0.77695800  |
| C  | 0.76705300  | -0.36073300 | 1.89688100  |
| C  | -1.00227700 | 0.99693100  | 0.99870900  |
| C  | 0.08920100  | -0.43035000 | 3.10206600  |
| H  | 1.71806800  | -0.87341100 | 1.79392300  |
| C  | -1.70123400 | 0.95943200  | 2.20287000  |
| H  | -1.45730300 | 1.56451000  | 0.20078700  |
| C  | -1.18004800 | 0.18783600  | 3.29356700  |
| O  | -1.84226200 | -0.02143700 | 4.40840300  |
| Ir | 0.93419400  | 0.07438100  | -1.16337400 |

|   |             |             |             |
|---|-------------|-------------|-------------|
| H | 0.48211700  | -1.00142100 | 3.93803700  |
| C | -2.97782600 | 1.72401700  | 2.22172800  |
| O | -3.58482900 | 2.06280800  | 1.21472100  |
| O | -3.39649600 | 2.06721700  | 3.45644600  |
| C | -4.57991800 | 2.87676800  | 3.49061500  |
| H | -4.42186500 | 3.81499400  | 2.95008400  |
| H | -5.42470400 | 2.34992300  | 3.03743000  |
| H | -4.76893600 | 3.06803100  | 4.54767100  |
| C | 1.27195900  | 5.71604600  | -0.62988400 |
| C | 1.14948100  | 5.93604400  | 0.89106400  |
| H | 0.75067900  | 6.52518600  | -1.15473100 |
| H | 2.32732800  | 5.79503300  | -0.92372300 |
| H | 1.57211800  | 6.90409900  | 1.18408500  |
| H | 0.09923300  | 5.91038500  | 1.20120100  |
| H | 1.67425100  | 5.14941000  | 1.44433600  |
| C | -1.65584700 | 5.06783800  | -1.86109400 |
| C | -2.65173800 | 5.08944500  | -0.68188400 |
| H | -2.18425500 | 4.78509500  | -2.78091500 |
| H | -1.27173500 | 6.08053000  | -2.03261900 |
| H | -3.50699100 | 5.73893800  | -0.90304900 |
| H | -3.02573300 | 4.08582800  | -0.45222600 |
| H | -2.16175100 | 5.46635500  | 0.22306200  |
| C | -4.33263700 | 0.59206200  | -3.11857800 |
| C | -5.13303700 | 0.86180100  | -1.82612300 |
| H | -4.93037800 | -0.02776400 | -3.79745500 |
| H | -4.15972100 | 1.53878700  | -3.64613300 |
| H | -6.05312800 | 1.41738300  | -2.04247100 |
| H | -5.41257800 | -0.08476500 | -1.34838600 |
| H | -4.54215400 | 1.42950600  | -1.09963300 |
| C | -3.64713000 | -2.56321300 | -3.19745600 |
| C | -4.32257100 | -3.26300200 | -2.00261900 |
| H | -3.07793900 | -3.30487500 | -3.77392400 |
| H | -4.42318900 | -2.18761200 | -3.87451100 |
| H | -5.00946200 | -4.04527800 | -2.34552400 |
| H | -3.58089600 | -3.72901200 | -1.34614700 |
| H | -4.89075500 | -2.54658000 | -1.39980500 |
| C | 0.48159500  | -5.55917400 | -1.39156200 |
| C | -0.53378800 | -5.93687000 | -0.29534300 |
| H | 1.25711800  | -6.33217500 | -1.44486300 |
| H | -0.01995700 | -5.56710500 | -2.36815000 |
| H | -0.98713900 | -6.91432400 | -0.49627500 |
| H | -0.04590400 | -5.98044500 | 0.68495500  |
| H | -1.33616200 | -5.19426700 | -0.23045600 |
| C | 3.32765900  | -4.91453600 | 0.00094600  |

|   |             |             |             |
|---|-------------|-------------|-------------|
| C | 3.22223300  | -5.02807200 | 1.53477100  |
| H | 4.34666000  | -4.60880800 | -0.27098800 |
| H | 3.18014100  | -5.90483900 | -0.44532900 |
| H | 3.96495400  | -5.72970900 | 1.93150900  |
| H | 3.38084500  | -4.05371800 | 2.01023500  |
| H | 2.22627400  | -5.37949700 | 1.82725700  |
| C | 6.05043000  | -0.43079100 | 1.25563200  |
| C | 5.75867800  | -0.93506000 | 2.68283800  |
| H | 6.90222600  | 0.25872600  | 1.28409200  |
| H | 6.36635700  | -1.27595300 | 0.62954700  |
| H | 6.63343000  | -1.43824600 | 3.11084200  |
| H | 5.48600600  | -0.10044800 | 3.33819800  |
| H | 4.92118400  | -1.64189000 | 2.68432100  |
| C | 5.43655200  | 2.74429000  | 1.04388900  |
| C | 4.94998600  | 3.27954600  | 2.40513200  |
| H | 5.42798000  | 3.56001800  | 0.30886400  |
| H | 6.48290000  | 2.42940000  | 1.13304300  |
| H | 5.56673400  | 4.12117300  | 2.74100100  |
| H | 3.90975900  | 3.61796900  | 2.34365000  |
| H | 4.99537100  | 2.49342100  | 3.16697900  |
| C | -2.14859400 | -3.05119800 | 3.54471800  |
| C | -3.23720600 | -2.11875700 | 3.82175300  |
| C | -3.93813800 | -1.54061400 | 2.67025400  |
| C | -3.40038300 | -1.64502400 | 1.43049500  |
| C | -2.14486600 | -2.40476900 | 1.13839300  |
| C | -1.60885300 | -3.16210000 | 2.31134800  |
| H | -2.29619800 | -3.08063800 | 0.28226400  |
| H | -1.37373700 | -1.70605400 | 0.76453700  |
| H | -2.56224900 | -1.03885800 | 4.24967600  |
| H | -3.84805700 | -2.32760700 | 4.70430200  |
| H | -1.72500600 | -3.60424600 | 4.38008400  |
| H | -0.75316200 | -3.81005600 | 2.13606100  |
| H | -3.86871100 | -1.13296800 | 0.59257400  |
| C | -5.18366400 | -0.73954300 | 2.94484700  |
| H | -5.99772400 | -1.38276900 | 3.30470300  |
| H | -4.98272400 | 0.00185800  | 3.72692500  |
| H | -5.52683300 | -0.20889100 | 2.05121400  |

#### 4

|   |             |             |             |
|---|-------------|-------------|-------------|
| C | -0.30636100 | 1.22361900  | 0.09018500  |
| C | -1.00959100 | 0.08677300  | -0.00361800 |
| C | -0.33003300 | -1.26625800 | -0.08091100 |
| C | 1.15363300  | -1.21496300 | 0.31311400  |
| C | 1.84752900  | -0.02082800 | -0.35299000 |

|   |             |             |             |
|---|-------------|-------------|-------------|
| C | 1.20168600  | 1.29582600  | 0.10488800  |
| H | -0.86663800 | -1.98141100 | 0.55958200  |
| H | -0.84103000 | 2.17142400  | 0.15961100  |
| H | 1.23489800  | -1.11317900 | 1.40449900  |
| H | 1.64886600  | -2.15593500 | 0.04375000  |
| H | 2.92105200  | -0.01714100 | -0.12784700 |
| H | 1.74946000  | -0.11240200 | -1.44388600 |
| H | 1.54729200  | 1.54657900  | 1.12105100  |
| H | 1.53863700  | 2.12527600  | -0.53253400 |
| H | -0.43352900 | -1.65851200 | -1.10579300 |
| C | -2.51566000 | 0.06937900  | -0.05101600 |
| H | -2.93197400 | -0.49642400 | 0.79463900  |
| H | -2.93976400 | 1.07882200  | -0.02743700 |
| H | -2.87448600 | -0.42838500 | -0.96354200 |

### OSS<sup>TS15</sup>

|   |             |             |             |
|---|-------------|-------------|-------------|
| N | 2.77749800  | 0.28926400  | -0.49131100 |
| N | 0.59738400  | 2.05279200  | -1.33327600 |
| N | -1.01064600 | -0.27207700 | -1.97364400 |
| N | 1.11389200  | -2.01366400 | -1.08515900 |
| C | 3.68170700  | -0.68704800 | -0.18169000 |
| C | 4.91309200  | -0.07821800 | 0.29449500  |
| C | 4.71845700  | 1.27880100  | 0.26176100  |
| C | 3.37023900  | 1.49712200  | -0.23931900 |
| C | 2.77027600  | 2.74059500  | -0.42648400 |
| C | 1.49038600  | 3.00132200  | -0.90788400 |
| C | 0.89149100  | 4.32168400  | -1.03575200 |
| C | -0.36525600 | 4.13787700  | -1.55033400 |
| C | -0.52895300 | 2.70617400  | -1.74654900 |
| C | -1.66522200 | 2.08178500  | -2.25863000 |
| C | -1.88460800 | 0.71583400  | -2.38431100 |
| C | -3.07293400 | 0.10552900  | -2.95159400 |
| C | -2.90027400 | -1.25340100 | -2.87537300 |
| C | -1.61320200 | -1.47967500 | -2.24345300 |
| C | -1.07329500 | -2.72329600 | -1.93385700 |
| C | 0.17653000  | -2.97446600 | -1.37797000 |
| C | 0.70975200  | -4.28857000 | -1.06462700 |
| C | 1.99118300  | -4.10075100 | -0.61542500 |
| C | 2.24136500  | -2.67010100 | -0.64049900 |
| C | 3.42997700  | -2.05685100 | -0.26025100 |
| H | -2.47108300 | 2.73236300  | -2.57807000 |
| H | 3.36804500  | 3.60594800  | -0.16257500 |
| H | 4.23912900  | -2.71462400 | 0.03672100  |
| H | -1.68569500 | -3.58862000 | -2.16118500 |

|    |             |             |             |
|----|-------------|-------------|-------------|
| C  | 1.84436100  | 0.21763800  | -3.13736900 |
| H  | 2.47179800  | 1.11036000  | -3.13229300 |
| H  | 2.44500200  | -0.68340200 | -3.29022000 |
| H  | 1.04878200  | 0.30477000  | -3.88365800 |
| C  | 0.28790100  | 0.22940900  | 0.80841700  |
| C  | 0.91686700  | -0.50660800 | 1.83847800  |
| C  | -0.75641200 | 1.08422900  | 1.17787100  |
| C  | 0.38447400  | -0.53357400 | 3.11431500  |
| H  | 1.78549800  | -1.11779400 | 1.62002600  |
| C  | -1.30857400 | 1.09077200  | 2.46521800  |
| H  | -1.22060600 | 1.73710200  | 0.45036700  |
| C  | -0.77060200 | 0.21559700  | 3.46369200  |
| O  | -1.30693700 | 0.02478500  | 4.65361900  |
| Ir | 0.84753500  | 0.00467200  | -1.19603800 |
| H  | 0.80428900  | -1.17152300 | 3.88752700  |
| C  | -2.45873500 | 2.01226100  | 2.66177800  |
| O  | -3.03488800 | 2.59129100  | 1.75146400  |
| O  | -2.81932800 | 2.17972300  | 3.95256100  |
| C  | -3.92136600 | 3.07032800  | 4.16134100  |
| H  | -3.69647700 | 4.06832900  | 3.77336400  |
| H  | -4.82183800 | 2.69876800  | 3.66075500  |
| H  | -4.06926800 | 3.10069300  | 5.24164500  |
| C  | 1.53383200  | 5.59920800  | -0.57924400 |
| C  | 1.47944500  | 5.77397100  | 0.95150600  |
| H  | 1.03650600  | 6.45067900  | -1.05821100 |
| H  | 2.58030800  | 5.63314000  | -0.91141900 |
| H  | 1.95867000  | 6.71097600  | 1.25808000  |
| H  | 0.44141100  | 5.78622900  | 1.30103400  |
| H  | 1.98648500  | 4.94557500  | 1.45839000  |
| C  | -1.45310400 | 5.15102400  | -1.75407300 |
| C  | -2.41598900 | 5.20733900  | -0.54957800 |
| H  | -2.01956600 | 4.91786000  | -2.66538400 |
| H  | -1.01332200 | 6.14211600  | -1.91820000 |
| H  | -3.24078700 | 5.90453000  | -0.73919900 |
| H  | -2.83284500 | 4.22114000  | -0.32157800 |
| H  | -1.88519300 | 5.54063400  | 0.34905100  |
| C  | -4.26115700 | 0.87022100  | -3.45867500 |
| C  | -5.18014800 | 1.36115800  | -2.32183200 |
| H  | -4.84006500 | 0.23957900  | -4.14374200 |
| H  | -3.92449800 | 1.73130900  | -4.05068700 |
| H  | -6.01411200 | 1.95083800  | -2.71951900 |
| H  | -5.59275800 | 0.51265600  | -1.76615100 |
| H  | -4.62775300 | 1.98080900  | -1.60722900 |
| C  | -3.82249000 | -2.34370700 | -3.34396900 |

|   |             |             |             |
|---|-------------|-------------|-------------|
| C | -4.68421900 | -2.96127600 | -2.22603300 |
| H | -3.23138200 | -3.13693100 | -3.82015300 |
| H | -4.48258500 | -1.95090200 | -4.12625000 |
| H | -5.27618800 | -3.80086700 | -2.60827800 |
| H | -4.06139700 | -3.32719200 | -1.40211800 |
| H | -5.37631400 | -2.21905500 | -1.81443900 |
| C | -0.07522600 | -5.56508300 | -1.14730800 |
| C | -1.07135200 | -5.71655600 | 0.02018900  |
| H | 0.60966200  | -6.42078800 | -1.15202000 |
| H | -0.62290300 | -5.60997000 | -2.09837100 |
| H | -1.63319800 | -6.65437600 | -0.05917300 |
| H | -0.54310700 | -5.71105800 | 0.98032700  |
| H | -1.78592800 | -4.88660000 | 0.03485500  |
| C | 2.95597500  | -5.12485400 | -0.09220000 |
| C | 2.98734100  | -5.16902400 | 1.44840700  |
| H | 3.96593000  | -4.91799900 | -0.47052400 |
| H | 2.68694500  | -6.11548100 | -0.47670200 |
| H | 3.70301000  | -5.91733400 | 1.80789200  |
| H | 3.27198300  | -4.19471700 | 1.86115900  |
| H | 1.99760400  | -5.41907200 | 1.84658800  |
| C | 6.10301800  | -0.84122200 | 0.80007800  |
| C | 5.90797000  | -1.35249900 | 2.24129700  |
| H | 6.99328500  | -0.20259500 | 0.76180300  |
| H | 6.31243400  | -1.69195900 | 0.13803500  |
| H | 6.78531100  | -1.91336800 | 2.58372600  |
| H | 5.74432500  | -0.51503400 | 2.92843600  |
| H | 5.03308500  | -2.00901000 | 2.30875600  |
| C | 5.64736100  | 2.36596300  | 0.71876000  |
| C | 5.29905300  | 2.88768900  | 2.12689700  |
| H | 5.62577500  | 3.20131500  | 0.00639300  |
| H | 6.67858300  | 1.99372200  | 0.71655000  |
| H | 5.98549800  | 3.68583700  | 2.43228100  |
| H | 4.27734300  | 3.28204500  | 2.15693500  |
| H | 5.36087100  | 2.07928700  | 2.86382200  |
| C | -2.98128600 | -2.79846600 | 4.16474800  |
| C | -3.46460200 | -1.35887900 | 4.26250200  |
| C | -3.89287800 | -0.74434800 | 3.03401600  |
| C | -3.53517200 | -1.19975900 | 1.79483500  |
| C | -2.78333900 | -2.49756300 | 1.62636200  |
| C | -2.11467800 | -3.01422800 | 2.91263700  |
| H | -4.44441500 | 0.19110600  | 3.09989200  |
| H | -3.49602200 | -3.24559400 | 1.23690200  |
| H | -2.02871600 | -2.37735100 | 0.83695400  |
| C | -3.85676700 | -0.43914500 | 0.54978200  |



|   |             |             |             |
|---|-------------|-------------|-------------|
| H | -4.39423000 | -1.06308800 | -0.17326300 |
| H | -4.43593200 | 0.46577800  | 0.74947600  |
| H | -2.92435300 | -0.13296100 | 0.05544700  |
| H | -2.37196500 | -0.58523200 | 4.53033100  |
| H | -4.06181200 | -1.12002800 | 5.14691400  |
| H | -2.41593200 | -3.07281500 | 5.06327900  |
| H | -3.85907600 | -3.46395100 | 4.13016500  |
| H | -1.86724800 | -4.07675400 | 2.79962800  |
| H | -1.16811400 | -2.48396800 | 3.04397900  |

**13**

|   |             |             |             |
|---|-------------|-------------|-------------|
| C | -1.92486400 | 0.08438200  | 0.19102500  |
| C | -1.09771300 | 1.32646000  | 0.00232300  |
| C | 0.28711500  | 1.25698900  | -0.08387700 |
| C | 1.00064400  | 0.06436100  | 0.01591400  |
| C | 0.24910500  | -1.23085100 | 0.20915600  |
| C | -1.18604700 | -1.15642200 | -0.33980300 |
| H | -2.15174300 | -0.05567600 | 1.26260900  |
| H | 0.84816500  | 2.18164100  | -0.21937800 |
| H | 0.79310900  | -2.05806600 | -0.26866900 |
| H | -1.73830600 | -2.06993100 | -0.08895700 |
| H | -1.59721300 | 2.29052300  | -0.04414300 |
| H | -2.89822500 | 0.18916200  | -0.30666800 |
| H | -1.14011000 | -1.09588700 | -1.43503100 |
| H | 0.22050500  | -1.47881500 | 1.28481200  |
| C | 2.49797700  | 0.01214200  | -0.01508600 |
| H | 2.86102800  | -0.61941200 | -0.84063800 |
| H | 2.94282200  | 1.00670300  | -0.12957600 |
| H | 2.90266700  | -0.43260700 | 0.90772700  |

**osST16**

|   |             |             |             |
|---|-------------|-------------|-------------|
| N | 1.13175200  | 1.85502200  | -1.28767900 |
| N | -1.47203600 | 0.59663300  | -1.72808300 |
| N | -0.25758600 | -2.00581300 | -1.28365300 |
| N | 2.32741200  | -0.75296300 | -0.94089600 |
| C | 2.41918500  | 2.26173300  | -1.06036600 |
| C | 2.47323900  | 3.71388800  | -1.01365000 |
| C | 1.19601200  | 4.16194100  | -1.23089100 |
| C | 0.36302500  | 2.98419700  | -1.41287200 |
| C | -1.01387100 | 3.00046900  | -1.61515400 |
| C | -1.86554800 | 1.90622600  | -1.73856700 |
| C | -3.31238600 | 1.97782400  | -1.86345400 |
| C | -3.76477200 | 0.68746100  | -1.96129300 |
| C | -2.59487300 | -0.17073600 | -1.85750400 |

|    |             |             |             |
|----|-------------|-------------|-------------|
| C  | -2.62144900 | -1.56310700 | -1.79072200 |
| C  | -1.55528400 | -2.40879300 | -1.50676100 |
| C  | -1.64601900 | -3.85449100 | -1.37259000 |
| C  | -0.38103200 | -4.30834900 | -1.10960800 |
| C  | 0.48635300  | -3.14133200 | -1.07974400 |
| C  | 1.86509600  | -3.16553200 | -0.89424800 |
| C  | 2.72075400  | -2.06961700 | -0.83601100 |
| C  | 4.15373700  | -2.13460100 | -0.62262500 |
| C  | 4.61780700  | -0.84354800 | -0.62879700 |
| C  | 3.46875100  | 0.01696200  | -0.83780200 |
| C  | 3.50219800  | 1.40535700  | -0.88041000 |
| H  | -3.58963600 | -2.03369600 | -1.91807000 |
| H  | -1.48059300 | 3.97801500  | -1.66018800 |
| H  | 4.47300600  | 1.87111000  | -0.75219600 |
| H  | 2.32051200  | -4.14216100 | -0.77458600 |
| C  | 0.66763100  | -0.11071900 | -3.39287200 |
| H  | 1.69935300  | -0.41165700 | -3.60443300 |
| H  | -0.04107400 | -0.83284200 | -3.80755700 |
| H  | 0.47098500  | 0.88926700  | -3.78643700 |
| C  | -0.45588100 | 0.42588000  | 0.75812000  |
| C  | -0.16686000 | 1.64975700  | 1.38814000  |
| C  | -1.63223400 | -0.20671700 | 1.13063300  |
| C  | -1.07719200 | 2.26599400  | 2.24365100  |
| H  | 0.77705700  | 2.15065300  | 1.19745200  |
| C  | -2.57996400 | 0.38640100  | 1.99427700  |
| H  | -1.89312100 | -1.17664000 | 0.72740000  |
| C  | -2.31400800 | 1.67190700  | 2.52678500  |
| O  | -3.16819700 | 2.37474800  | 3.31695600  |
| Ir | 0.43619700  | -0.08141400 | -1.26218200 |
| H  | -0.85941000 | 3.23009600  | 2.69477000  |
| C  | -3.80017900 | -0.39614900 | 2.24542300  |
| O  | -3.98827300 | -1.55685300 | 1.92913300  |
| O  | -4.78701900 | 0.32429800  | 2.88233600  |
| C  | -6.00749200 | -0.38996300 | 3.14032800  |
| H  | -6.47151800 | -0.69499700 | 2.19898800  |
| H  | -5.81076600 | -1.27783400 | 3.74662800  |
| H  | -6.64916000 | 0.31071200  | 3.67599400  |
| C  | -4.11437700 | 3.23800700  | -1.72259000 |
| C  | -4.22079200 | 3.67677600  | -0.24628300 |
| H  | -5.12039900 | 3.08772000  | -2.13177400 |
| H  | -3.66384600 | 4.04835800  | -2.31132400 |
| H  | -4.80206500 | 4.60116800  | -0.14874100 |
| H  | -4.70271400 | 2.89880200  | 0.35614500  |
| H  | -3.22817200 | 3.84264700  | 0.18572200  |

|   |             |             |             |
|---|-------------|-------------|-------------|
| C | -5.18463600 | 0.20528600  | -2.04258400 |
| C | -5.76172400 | -0.19346600 | -0.67003200 |
| H | -5.24975400 | -0.65299700 | -2.72445800 |
| H | -5.81073600 | 0.98935100  | -2.48498700 |
| H | -6.80345900 | -0.52366700 | -0.76445800 |
| H | -5.18180300 | -1.00195200 | -0.21619700 |
| H | -5.73157900 | 0.65641500  | 0.02171600  |
| C | -2.93020400 | -4.63059900 | -1.40110700 |
| C | -3.66574100 | -4.57825500 | -0.04596000 |
| H | -2.72741000 | -5.67508700 | -1.66674700 |
| H | -3.58734700 | -4.24127300 | -2.18961200 |
| H | -4.62772200 | -5.10168000 | -0.10142800 |
| H | -3.06211800 | -5.05641300 | 0.73398200  |
| H | -3.84620400 | -3.54676200 | 0.27365400  |
| C | 0.06620600  | -5.70737300 | -0.80144000 |
| C | 0.28711000  | -5.93387300 | 0.70756500  |
| H | 0.99573200  | -5.93359400 | -1.34152800 |
| H | -0.67945100 | -6.42199700 | -1.16866500 |
| H | 0.62261900  | -6.95784700 | 0.90918400  |
| H | 1.04058500  | -5.24170000 | 1.10026100  |
| H | -0.64133100 | -5.75914000 | 1.26234500  |
| C | 4.91389900  | -3.39728600 | -0.33965700 |
| C | 4.73809400  | -3.86459200 | 1.11926200  |
| H | 5.97979700  | -3.24300800 | -0.54402400 |
| H | 4.58713000  | -4.19525500 | -1.01934800 |
| H | 5.28794000  | -4.79424100 | 1.30622600  |
| H | 5.10343200  | -3.10070600 | 1.81462300  |
| H | 3.68079900  | -4.03669700 | 1.34950400  |
| C | 6.01722800  | -0.35797200 | -0.38247300 |
| C | 6.22635000  | 0.15049100  | 1.05757200  |
| H | 6.26585200  | 0.44471100  | -1.08931200 |
| H | 6.72728900  | -1.16848500 | -0.58359700 |
| H | 7.26061200  | 0.47745600  | 1.21532000  |
| H | 5.56493700  | 0.99685000  | 1.27251000  |
| H | 5.99819800  | -0.63780700 | 1.78351800  |
| C | 3.70075200  | 4.50885500  | -0.67567800 |
| C | 4.01464100  | 4.48948700  | 0.83388900  |
| H | 3.57162200  | 5.54677400  | -1.00412700 |
| H | 4.56592800  | 4.12086300  | -1.23010900 |
| H | 4.92201600  | 5.06222600  | 1.05844800  |
| H | 3.18472400  | 4.92067900  | 1.40497300  |
| H | 4.15866700  | 3.46281300  | 1.18900800  |
| C | 0.67822700  | 5.56961500  | -1.17496500 |
| C | 0.04065800  | 5.89826200  | 0.19042600  |

|   |             |             |             |
|---|-------------|-------------|-------------|
| H | -0.06140300 | 5.73138700  | -1.97001400 |
| H | 1.49445200  | 6.27443300  | -1.37287600 |
| H | -0.35920700 | 6.91881400  | 0.20611100  |
| H | -0.77477100 | 5.20305900  | 0.41869800  |
| H | 0.78261500  | 5.80748900  | 0.99194000  |
| C | 0.33720000  | -1.81148000 | 3.26645700  |
| C | 1.30060900  | -1.38830300 | 2.20242800  |
| C | 2.24896800  | -0.39292000 | 2.43321400  |
| C | 2.34028500  | 0.28520700  | 3.63513800  |
| C | 1.42848400  | -0.08180500 | 4.77898500  |
| C | 0.10456100  | -0.69877500 | 4.29898100  |
| H | 2.92113500  | -0.12269400 | 1.62531400  |
| H | 1.95991600  | -0.79094700 | 5.43808400  |
| H | 1.22952500  | 0.80367100  | 5.39806600  |
| C | 3.34806200  | 1.36905800  | 3.86121800  |
| H | 3.99536700  | 1.14320000  | 4.72241600  |
| H | 3.98663600  | 1.52581900  | 2.98613300  |
| H | 2.84913900  | 2.32154300  | 4.09540800  |
| H | -3.99340200 | 1.86017500  | 3.39834300  |
| H | 1.31000600  | -1.93601300 | 1.27209600  |
| H | -0.61244300 | -2.11685100 | 2.81101100  |
| H | 0.73984500  | -2.71342300 | 3.76244200  |
| H | -0.46751000 | -1.08106100 | 5.15244600  |
| H | -0.49501000 | 0.08588500  | 3.83004300  |

## 15

|   |             |             |             |
|---|-------------|-------------|-------------|
| C | 0.58970300  | 1.25631400  | -0.39569700 |
| C | -0.08079900 | 2.49472300  | -0.41639500 |
| C | -0.18391500 | 0.11294800  | -0.24563400 |
| C | -1.45798900 | 2.58011400  | -0.28932800 |
| H | 0.49691700  | 3.40940900  | -0.53565700 |
| C | -1.58642800 | 0.16311200  | -0.11165200 |
| H | 0.28543800  | -0.86464500 | -0.23694700 |
| C | -2.23576600 | 1.42100500  | -0.13380700 |
| O | -3.57100500 | 1.60423900  | -0.01910100 |
| H | -1.97158400 | 3.53598200  | -0.31020400 |
| C | -2.27285300 | -1.13835800 | 0.04254700  |
| O | -1.73604500 | -2.22627000 | 0.06971500  |
| O | -3.63808100 | -1.01728100 | 0.16074000  |
| C | -4.35939000 | -2.25245900 | 0.31513800  |
| H | -4.19492600 | -2.89814800 | -0.55118800 |
| H | -4.02906900 | -2.77418600 | 1.21690900  |
| H | -5.40976400 | -1.97038000 | 0.39384300  |
| C | 2.76648000  | 1.44139100  | 0.90581800  |

|   |             |             |             |
|---|-------------|-------------|-------------|
| C | 2.11396800  | 1.21078200  | -0.48116600 |
| C | 2.62037400  | -0.07038600 | -1.10382400 |
| C | 3.25207400  | -1.04664300 | -0.43745300 |
| C | 3.52956500  | -0.95417200 | 1.04917900  |
| C | 2.73299100  | 0.15970100  | 1.74285400  |
| H | 3.81049700  | 1.74997600  | 0.75657800  |
| H | 2.42425300  | -0.19405400 | -2.16881300 |
| H | 3.31542800  | -1.92410600 | 1.52019100  |
| H | 3.13319600  | 0.34237700  | 2.74722800  |
| H | 2.41791300  | 2.04435000  | -1.13183600 |
| H | 2.25569900  | 2.26176900  | 1.42380900  |
| H | 1.69022800  | -0.15913200 | 1.86898800  |
| H | 4.60997900  | -0.79064400 | 1.19390800  |
| C | 3.74908700  | -2.29402400 | -1.12144800 |
| H | 3.26922700  | -3.18919100 | -0.70216500 |
| H | 3.55608100  | -2.27690000 | -2.19910700 |
| H | 4.83076000  | -2.41990600 | -0.97028300 |
| H | -3.99183400 | 0.72762800  | 0.07910400  |

#### OSS<sup>TS17</sup>

|   |             |             |             |
|---|-------------|-------------|-------------|
| N | -2.76811000 | -0.34094500 | -0.50468100 |
| N | -0.54375700 | -2.00929300 | -1.42566700 |
| N | 1.01060600  | 0.39538000  | -1.94421200 |
| N | -1.16946500 | 2.02590000  | -0.99367500 |
| C | -3.68130500 | 0.59069700  | -0.09718900 |
| C | -4.88908400 | -0.07574900 | 0.36167800  |
| C | -4.67309400 | -1.42216400 | 0.21845600  |
| C | -3.33322900 | -1.57723200 | -0.32641300 |
| C | -2.71112700 | -2.79394600 | -0.59498200 |
| C | -1.42068200 | -2.99999200 | -1.07628500 |
| C | -0.78685300 | -4.29619400 | -1.26444700 |
| C | 0.47888300  | -4.05217600 | -1.73141800 |
| C | 0.61034900  | -2.60861800 | -1.84199300 |
| C | 1.74924100  | -1.92894100 | -2.27128500 |
| C | 1.93795900  | -0.55280000 | -2.31856600 |
| C | 3.14938800  | 0.10559200  | -2.77318700 |
| C | 2.91617200  | 1.45514200  | -2.71764000 |
| C | 1.57666800  | 1.62530000  | -2.17710600 |
| C | 0.96482400  | 2.84195600  | -1.89609200 |
| C | -0.28970900 | 3.03298600  | -1.32688400 |
| C | -0.87671900 | 4.31820400  | -0.99913000 |
| C | -2.11920400 | 4.06809700  | -0.47219900 |
| C | -2.30472700 | 2.63087000  | -0.48805000 |
| C | -3.45676800 | 1.96676900  | -0.08601600 |

|    |             |             |             |
|----|-------------|-------------|-------------|
| H  | 2.59168800  | -2.54112400 | -2.57073100 |
| H  | -3.29256700 | -3.68531300 | -0.38728700 |
| H  | -4.27012100 | 2.58659500  | 0.27436900  |
| H  | 1.53566500  | 3.73585400  | -2.12231200 |
| C  | -1.72820800 | -0.18285900 | -3.18227600 |
| H  | -2.49755800 | -0.95649200 | -3.16487700 |
| H  | -2.16085000 | 0.79446900  | -3.41991900 |
| H  | -0.92238500 | -0.44532500 | -3.87227000 |
| C  | -0.21515100 | -0.38399200 | 0.76882800  |
| C  | -0.99185000 | -0.12255900 | 1.92054500  |
| C  | 1.02779400  | -1.00024600 | 0.97134300  |
| C  | -0.48326900 | -0.35365700 | 3.18830500  |
| H  | -1.97876800 | 0.31776300  | 1.82542300  |
| C  | 1.57011500  | -1.24855100 | 2.23399100  |
| H  | 1.64259300  | -1.28184800 | 0.12945100  |
| C  | 0.80568000  | -0.91575900 | 3.39898600  |
| O  | 1.22221800  | -1.10205200 | 4.63364300  |
| Ir | -0.85420200 | 0.03378500  | -1.18559500 |
| H  | -1.05198600 | -0.09882200 | 4.07844000  |
| C  | 2.92724900  | -1.85622300 | 2.23069200  |
| O  | 3.52512900  | -2.19011500 | 1.21661400  |
| O  | 3.47694500  | -2.00300300 | 3.45620300  |
| C  | 4.78297700  | -2.59461700 | 3.46802600  |
| H  | 4.76163900  | -3.59005000 | 3.01524400  |
| H  | 5.49452900  | -1.97381600 | 2.91437000  |
| H  | 5.06301600  | -2.65558100 | 4.52041100  |
| C  | -1.40927300 | -5.61293700 | -0.90092200 |
| C  | -1.38153300 | -5.88233800 | 0.61674800  |
| H  | -0.88392600 | -6.42229100 | -1.42127900 |
| H  | -2.44789000 | -5.64793100 | -1.25671700 |
| H  | -1.84762200 | -6.84565500 | 0.85421700  |
| H  | -0.35073400 | -5.89704700 | 0.98690100  |
| H  | -1.91502900 | -5.09725400 | 1.16387400  |
| C  | 1.59865000  | -5.02436900 | -1.96053500 |
| C  | 2.53628800  | -5.11622800 | -0.73805000 |
| H  | 2.17859300  | -4.72979000 | -2.84501000 |
| H  | 1.19041800  | -6.01727000 | -2.18415600 |
| H  | 3.38176100  | -5.78390300 | -0.94207200 |
| H  | 2.92670900  | -4.13231200 | -0.45685500 |
| H  | 1.99321600  | -5.50810600 | 0.12946400  |
| C  | 4.42500300  | -0.60828100 | -3.10994100 |
| C  | 5.19882700  | -1.01587600 | -1.83740500 |
| H  | 5.05846100  | 0.03421700  | -3.73319200 |
| H  | 4.21317300  | -1.50221700 | -3.71104200 |

|   |             |             |             |
|---|-------------|-------------|-------------|
| H | 6.09966300  | -1.58614100 | -2.09280600 |
| H | 5.50437700  | -0.12620800 | -1.27538300 |
| H | 4.57919700  | -1.61986600 | -1.16638200 |
| C | 3.84511800  | 2.56524000  | -3.12411200 |
| C | 4.74095100  | 3.09232400  | -1.98770800 |
| H | 3.26421900  | 3.39768600  | -3.54171800 |
| H | 4.48441700  | 2.20921600  | -3.94128100 |
| H | 5.41902300  | 3.87058900  | -2.35700300 |
| H | 4.14406400  | 3.51806700  | -1.17599800 |
| H | 5.34617300  | 2.28391300  | -1.56423000 |
| C | -0.19186700 | 5.64365900  | -1.16884000 |
| C | 0.78111000  | 5.96897000  | -0.01885400 |
| H | -0.94454900 | 6.43769100  | -1.23831800 |
| H | 0.35404000  | 5.66234500  | -2.12115300 |
| H | 1.25870500  | 6.94362400  | -0.17216800 |
| H | 0.25066400  | 5.99400000  | 0.93969300  |
| H | 1.56596400  | 5.21006300  | 0.05853700  |
| C | -3.10456100 | 5.04863600  | 0.09420400  |
| C | -3.07076400 | 5.09072300  | 1.63483500  |
| H | -4.11999900 | 4.79723300  | -0.23975200 |
| H | -2.89633600 | 6.05039800  | -0.29897300 |
| H | -3.80268600 | 5.80639600  | 2.02651500  |
| H | -3.29333200 | 4.10455400  | 2.05729200  |
| H | -2.07687200 | 5.38493400  | 1.99027200  |
| C | -6.07862500 | 0.62426700  | 0.95204800  |
| C | -5.85340100 | 1.03505100  | 2.42073500  |
| H | -6.95765300 | -0.02798300 | 0.89112600  |
| H | -6.32172200 | 1.51598500  | 0.35898400  |
| H | -6.73128200 | 1.55145600  | 2.82593400  |
| H | -5.65528900 | 0.15395000  | 3.04111100  |
| H | -4.98969800 | 1.70340800  | 2.51206300  |
| C | -5.57113100 | -2.55782400 | 0.61532300  |
| C | -5.18500800 | -3.16688200 | 1.97789400  |
| H | -5.54649200 | -3.34164700 | -0.15318100 |
| H | -6.60952100 | -2.20856200 | 0.65725800  |
| H | -5.84707800 | -4.00055300 | 2.23884500  |
| H | -4.15400500 | -3.53718100 | 1.96352400  |
| H | -5.25208300 | -2.41291100 | 2.77004500  |
| C | 2.76205800  | 2.85529700  | 1.25437200  |
| C | 1.44083500  | 2.67125000  | 2.01210000  |
| C | 1.63911900  | 2.10518900  | 3.38329300  |
| C | 2.78351800  | 1.47500300  | 3.80492700  |
| C | 3.98076200  | 1.35237300  | 2.87749900  |
| C | 3.64958700  | 1.61449300  | 1.40077200  |

|   |            |             |            |
|---|------------|-------------|------------|
| H | 0.79888500 | 2.16185500  | 4.07275100 |
| H | 4.74140700 | 2.07177500  | 3.21881200 |
| H | 4.43174500 | 0.36129000  | 3.00190200 |
| C | 2.83877100 | 0.83729100  | 5.09326500 |
| H | 3.81405100 | 0.49361900  | 5.44030600 |
| H | 2.20989500 | 1.25623300  | 5.88089200 |
| H | 2.11280700 | -0.32465100 | 4.87298300 |
| H | 0.78721400 | 1.98533000  | 1.44767800 |
| H | 0.88587500 | 3.61826500  | 2.06597300 |
| H | 2.54706700 | 3.04314000  | 0.19960300 |
| H | 3.29315900 | 3.73549800  | 1.64497800 |
| H | 4.57652100 | 1.73328900  | 0.82740900 |
| H | 3.12724400 | 0.74957700  | 0.97817200 |

**14**

|   |             |             |             |
|---|-------------|-------------|-------------|
| C | 1.80126300  | -0.03151500 | 0.31393000  |
| C | 1.14175600  | 1.29844000  | -0.08533100 |
| C | -0.35876000 | 1.23835500  | -0.05325600 |
| C | -1.10389600 | 0.06371800  | 0.02395100  |
| C | -0.38076000 | -1.27535000 | 0.13644600  |
| C | 1.07447600  | -1.20869900 | -0.34770300 |
| H | -0.89533300 | 2.18239600  | -0.14112700 |
| H | -0.39251700 | -1.59461600 | 1.18911400  |
| H | -0.93561400 | -2.04066600 | -0.42015700 |
| C | -2.49417900 | 0.08065100  | 0.01402500  |
| H | -3.07314300 | -0.83687100 | 0.06270600  |
| H | -3.04670100 | 1.01478700  | -0.03818200 |
| H | 1.58521800  | -2.15418800 | -0.12804100 |
| H | 1.09457700  | -1.08067700 | -1.43943400 |
| H | 2.86335500  | -0.02161700 | 0.04098900  |
| H | 1.75322700  | -0.15088000 | 1.40542400  |
| H | 1.46789600  | 1.57473200  | -1.10378400 |
| H | 1.49963600  | 2.11400000  | 0.56012500  |

**OSST18**

|   |             |             |             |
|---|-------------|-------------|-------------|
| N | -1.85318600 | -1.92772200 | -0.68246500 |
| N | 0.77857700  | -1.20832600 | -1.74943200 |
| N | 0.05792100  | 1.59740700  | -1.55416700 |
| N | -2.56721900 | 0.87087600  | -0.58146400 |
| C | -3.11366200 | -2.06999500 | -0.16818900 |
| C | -3.37907900 | -3.47530800 | 0.09582900  |
| C | -2.25248200 | -4.16368400 | -0.27307500 |
| C | -1.30223100 | -3.18028000 | -0.76716100 |
| C | -0.00878400 | -3.46206700 | -1.19745800 |



|    |             |             |             |
|----|-------------|-------------|-------------|
| C  | 0.95854700  | -2.55852600 | -1.62876300 |
| C  | 2.32529200  | -2.90029500 | -1.98792700 |
| C  | 2.94275200  | -1.73165500 | -2.35181900 |
| C  | 1.96046800  | -0.67309100 | -2.17787800 |
| C  | 2.21022100  | 0.69085900  | -2.32424000 |
| C  | 1.34628100  | 1.73741700  | -2.02349500 |
| C  | 1.66004000  | 3.14940500  | -2.16806500 |
| C  | 0.52553300  | 3.84494700  | -1.84010900 |
| C  | -0.47839800 | 2.85926800  | -1.47090800 |
| C  | -1.78575300 | 3.14373100  | -1.08898100 |
| C  | -2.75302200 | 2.23278100  | -0.67561700 |
| C  | -4.08816400 | 2.57593700  | -0.22193800 |
| C  | -4.70269000 | 1.40233500  | 0.13163300  |
| C  | -3.74857500 | 0.33587400  | -0.11171700 |
| C  | -3.99019300 | -1.01799100 | 0.08655000  |
| H  | 3.20001900  | 0.96587700  | -2.67033100 |
| H  | 0.28735000  | -4.50475500 | -1.17391700 |
| H  | -4.96687900 | -1.28404800 | 0.47530600  |
| H  | -2.07485700 | 4.18868800  | -1.09382500 |
| C  | -1.53082700 | -0.40417700 | -3.12091500 |
| H  | -1.51186700 | -1.46671800 | -3.37355700 |
| H  | -2.55041200 | -0.01072300 | -3.19069600 |
| H  | -0.85082300 | 0.15603600  | -3.76881700 |
| C  | 0.25531700  | -0.56904900 | 0.82533500  |
| C  | -0.12656000 | -1.58630500 | 1.71449300  |
| C  | 1.57399700  | -0.14614300 | 0.87994000  |
| C  | 0.80063400  | -2.21151300 | 2.54994000  |
| H  | -1.15899500 | -1.92038100 | 1.75288700  |
| C  | 2.54467300  | -0.77336300 | 1.68550200  |
| H  | 1.91401500  | 0.68663100  | 0.27839600  |
| C  | 2.15212400  | -1.85049500 | 2.52161200  |
| O  | 2.99652000  | -2.55426800 | 3.32117100  |
| Ir | -0.88779000 | -0.15583100 | -1.09416800 |
| H  | 0.50020000  | -3.01037400 | 3.22190900  |
| C  | 3.91088400  | -0.23947300 | 1.58324500  |
| O  | 4.24280400  | 0.79194500  | 1.02326300  |
| O  | 4.85424800  | -1.03424700 | 2.19205100  |
| C  | 6.20637200  | -0.54825900 | 2.13504500  |
| H  | 6.54313600  | -0.49286500 | 1.09690900  |
| H  | 6.27495700  | 0.44437700  | 2.58758800  |
| H  | 6.80077500  | -1.27135800 | 2.69466100  |
| C  | 2.93542500  | -4.25902500 | -1.80754200 |
| C  | 3.25990200  | -4.53958900 | -0.32459700 |
| H  | 3.85297400  | -4.33785700 | -2.40252000 |

|   |             |             |             |
|---|-------------|-------------|-------------|
| H | 2.25907000  | -5.03740900 | -2.18542200 |
| H | 3.69856100  | -5.53609800 | -0.19669200 |
| H | 3.96572600  | -3.79718300 | 0.06431400  |
| H | 2.35727300  | -4.47504900 | 0.29251900  |
| C | 4.37353600  | -1.52656000 | -2.75978200 |
| C | 5.28008300  | -1.10315100 | -1.58765200 |
| H | 4.43035700  | -0.76813800 | -3.55176900 |
| H | 4.76155200  | -2.45216500 | -3.20173200 |
| H | 6.31752200  | -0.97770400 | -1.92098600 |
| H | 4.94129200  | -0.16279400 | -1.14452800 |
| H | 5.26316100  | -1.86104300 | -0.79551400 |
| C | 3.02207900  | 3.68348300  | -2.50123800 |
| C | 3.96108800  | 3.66368200  | -1.27694500 |
| H | 2.93774000  | 4.70883800  | -2.88034400 |
| H | 3.46961400  | 3.09603000  | -3.31368600 |
| H | 4.96357500  | 4.01783700  | -1.54483900 |
| H | 3.56989900  | 4.31275000  | -0.48530900 |
| H | 4.04806800  | 2.65649000  | -0.85597700 |
| C | 0.32516300  | 5.33227500  | -1.78325400 |
| C | 0.41725900  | 5.89955200  | -0.35298900 |
| H | -0.65171600 | 5.59300100  | -2.21222400 |
| H | 1.07297800  | 5.82632300  | -2.41441300 |
| H | 0.25113800  | 6.98303400  | -0.34767300 |
| H | -0.32665500 | 5.43477800  | 0.30338500  |
| H | 1.40508600  | 5.70182300  | 0.07803400  |
| C | -4.60608500 | 3.97838400  | -0.08784800 |
| C | -4.08340300 | 4.67654000  | 1.18368800  |
| H | -5.70214800 | 3.96804500  | -0.06925800 |
| H | -4.32375800 | 4.56917800  | -0.96926900 |
| H | -4.45803200 | 5.70438900  | 1.25266400  |
| H | -4.40230000 | 4.13277000  | 2.07986900  |
| H | -2.98815700 | 4.70773000  | 1.19153800  |
| C | -6.06479600 | 1.20791900  | 0.73215200  |
| C | -6.01269300 | 1.00046600  | 2.25871500  |
| H | -6.56093900 | 0.34637500  | 0.26586500  |
| H | -6.69406000 | 2.07702300  | 0.50757200  |
| H | -7.01703900 | 0.85085200  | 2.67160100  |
| H | -5.40261600 | 0.12670700  | 2.51364700  |
| H | -5.56425900 | 1.87080500  | 2.75079600  |
| C | -4.62958400 | -4.00246500 | 0.73768400  |
| C | -4.64704900 | -3.78737600 | 2.26399200  |
| H | -4.73058100 | -5.07287800 | 0.52323700  |
| H | -5.51108600 | -3.52036900 | 0.29403600  |
| H | -5.57350500 | -4.17055600 | 2.70740300  |

|   |             |             |             |
|---|-------------|-------------|-------------|
| H | -3.80176800 | -4.30159200 | 2.73492400  |
| H | -4.56339200 | -2.72262600 | 2.50916200  |
| C | -1.95538300 | -5.62560500 | -0.10764900 |
| C | -1.12121100 | -5.90738000 | 1.15866700  |
| H | -1.41934400 | -6.00359700 | -0.98807700 |
| H | -2.89271600 | -6.19218300 | -0.05747500 |
| H | -0.88565900 | -6.97416800 | 1.24880800  |
| H | -0.18113200 | -5.34500800 | 1.14112700  |
| H | -1.66982300 | -5.59939300 | 2.05592700  |
| C | 2.72891700  | 3.26756300  | 3.87976500  |
| C | 2.51146000  | 3.48435200  | 2.37430300  |
| C | 1.17589800  | 2.99057700  | 1.91351700  |
| C | 0.37110700  | 2.13461300  | 2.64024200  |
| C | 0.82173000  | 1.60520000  | 3.99455900  |
| C | 2.31310000  | 1.84496300  | 4.27520100  |
| H | 0.85033400  | 3.28405300  | 0.91869000  |
| H | 0.21979500  | 2.08573500  | 4.77998200  |
| H | 0.59755500  | 0.53251500  | 4.04402200  |
| C | -0.83838500 | 1.68927500  | 2.09999000  |
| H | -1.46982500 | 0.97988800  | 2.62314800  |
| H | -1.21689800 | 2.10104000  | 1.17897100  |
| H | 3.90198200  | -2.22676700 | 3.16492600  |
| H | 3.28839200  | 2.94701800  | 1.80690000  |
| H | 2.62922500  | 4.54582400  | 2.10922700  |
| H | 3.77896900  | 3.45153400  | 4.13759300  |
| H | 2.12790300  | 3.99271800  | 4.44663100  |
| H | 2.52633200  | 1.65659000  | 5.33444900  |
| H | 2.90803000  | 1.12692800  | 3.69887900  |

## 5

|   |             |             |             |
|---|-------------|-------------|-------------|
| C | 0.26800100  | 1.52759000  | 0.53036000  |
| C | -0.45920000 | 2.65305800  | 0.10603300  |
| C | -0.39085800 | 0.30391800  | 0.54514000  |
| C | -1.78987800 | 2.55677100  | -0.27585200 |
| H | 0.03082600  | 3.62394000  | 0.07507300  |
| C | -1.73866100 | 0.16998100  | 0.16241800  |
| H | 0.13772600  | -0.59405400 | 0.84937300  |
| C | -2.45342800 | 1.32094000  | -0.25471500 |
| O | -3.74800500 | 1.32524300  | -0.64741400 |
| H | -2.34899700 | 3.42692600  | -0.60448700 |
| C | -2.30194600 | -1.19748200 | 0.22449900  |
| O | -1.70521300 | -2.19631600 | 0.56835800  |
| O | -3.62193800 | -1.25440900 | -0.15674500 |
| C | -4.22364600 | -2.56083000 | -0.11665600 |

|   |             |             |             |
|---|-------------|-------------|-------------|
| H | -3.69335700 | -3.24289600 | -0.78600800 |
| H | -4.19182800 | -2.96137400 | 0.89969500  |
| H | -5.25372900 | -2.41891800 | -0.44493400 |
| C | 4.52668500  | -1.25934500 | -0.74133600 |
| C | 4.03809800  | -1.50756100 | 0.69424600  |
| C | 3.14885000  | -0.39511000 | 1.19383900  |
| C | 2.60469100  | 0.54719100  | 0.41155100  |
| C | 2.82127200  | 0.56662100  | -1.08814400 |
| C | 3.37326100  | -0.76279700 | -1.62165200 |
| H | 2.94446100  | -0.37665600 | 2.26483500  |
| H | 1.87484100  | 0.81226800  | -1.58781000 |
| H | 3.51199300  | 1.38866100  | -1.33721500 |
| C | 1.72068900  | 1.63908200  | 0.97399400  |
| H | 1.77118500  | 1.62236700  | 2.07125200  |
| H | 2.10651900  | 2.62115200  | 0.66315700  |
| H | 2.56956100  | -1.51242300 | -1.61884800 |
| H | 3.69810800  | -0.64657200 | -2.66280600 |
| H | 5.31958300  | -0.49820900 | -0.72811100 |
| H | 4.96917100  | -2.17379200 | -1.15473000 |
| H | 4.89438400  | -1.63031300 | 1.37206400  |
| H | 3.48552400  | -2.45952500 | 0.74175700  |
| H | -4.08830000 | 0.41111200  | -0.58819300 |

### **CSS**TS19

|   |             |             |             |
|---|-------------|-------------|-------------|
| N | -1.11537200 | 1.52038500  | -1.29080100 |
| N | -0.69787600 | -1.34836300 | -1.52376400 |
| N | 2.13660800  | -0.96292700 | -1.00541200 |
| N | 1.72512000  | 1.90700100  | -0.80293300 |
| C | -1.10896100 | 2.88764700  | -1.16379500 |
| C | -2.46966400 | 3.39065400  | -1.25111800 |
| C | -3.28185200 | 2.30241700  | -1.44354200 |
| C | -2.41757800 | 1.13394200  | -1.48944100 |
| C | -2.83977000 | -0.17385700 | -1.71661100 |
| C | -2.05034800 | -1.31871300 | -1.75272500 |
| C | -2.52422900 | -2.66497900 | -2.04312400 |
| C | -1.42928200 | -3.48691300 | -1.99319000 |
| C | -0.28552100 | -2.64669200 | -1.67230500 |
| C | 1.02471100  | -3.09186800 | -1.52271600 |
| C | 2.13802000  | -2.32468700 | -1.18562100 |
| C | 3.46689900  | -2.84514000 | -0.92357700 |
| C | 4.25708600  | -1.76966700 | -0.59345900 |
| C | 3.41565100  | -0.58974000 | -0.66979100 |
| C | 3.83583500  | 0.71685200  | -0.43405100 |
| C | 3.06265500  | 1.87249900  | -0.50584300 |

|    |             |             |             |
|----|-------------|-------------|-------------|
| C  | 3.53790400  | 3.22329800  | -0.24982600 |
| C  | 2.46296700  | 4.05830900  | -0.41642100 |
| C  | 1.32860200  | 3.21792200  | -0.76469600 |
| C  | 0.02444400  | 3.66647700  | -0.95404600 |
| H  | 1.19425700  | -4.15394200 | -1.66122400 |
| H  | -3.90073500 | -0.31388100 | -1.88698900 |
| H  | -0.13257200 | 4.73709600  | -0.89285600 |
| H  | 4.88237100  | 0.84982000  | -0.18307300 |
| C  | 0.85598600  | 0.42723400  | -3.20647500 |
| H  | -0.03774900 | 0.82447200  | -3.70172700 |
| H  | 1.70478600  | 1.09285700  | -3.40095900 |
| H  | 1.07497500  | -0.56823300 | -3.61002200 |
| C  | 0.11578000  | 0.19001900  | 1.05785700  |
| C  | 0.42923600  | 1.40493800  | 1.78265900  |
| C  | -1.15493100 | -0.40575600 | 1.33573200  |
| C  | -0.60033200 | 2.18923500  | 2.19128800  |
| H  | 1.45446200  | 1.76018200  | 1.81513300  |
| C  | -2.21855200 | 0.33270500  | 1.77377200  |
| H  | -1.31048600 | -1.45440100 | 1.10953600  |
| C  | -2.01365800 | 1.76607000  | 2.09774300  |
| O  | -2.92637500 | 2.57268300  | 2.29550900  |
| Ir | 0.50838700  | 0.27812800  | -1.13179700 |
| H  | -0.44188700 | 3.20684900  | 2.53683500  |
| C  | -3.49885100 | -0.39832500 | 1.94286700  |
| O  | -3.67794700 | -1.54734900 | 1.55949100  |
| O  | -4.43614700 | 0.29262700  | 2.61356600  |
| C  | -5.67835200 | -0.39520100 | 2.81106000  |
| H  | -6.14439900 | -0.62914100 | 1.84927800  |
| H  | -5.52459000 | -1.32657200 | 3.36427500  |
| H  | -6.30268500 | 0.29468000  | 3.37954400  |
| C  | -3.95313200 | -3.04529800 | -2.30628100 |
| C  | -4.72578700 | -3.40863900 | -1.02361400 |
| H  | -3.98115300 | -3.89531200 | -2.99979500 |
| H  | -4.46724900 | -2.22401600 | -2.82102100 |
| H  | -5.77107200 | -3.64749800 | -1.25449100 |
| H  | -4.27563400 | -4.28281600 | -0.53928800 |
| H  | -4.69730500 | -2.59096200 | -0.29883700 |
| C  | -1.37356100 | -4.97582400 | -2.17747900 |
| C  | -1.27289000 | -5.74367000 | -0.84487500 |
| H  | -0.51860000 | -5.24343200 | -2.81305800 |
| H  | -2.26824700 | -5.31062600 | -2.71518300 |
| H  | -1.24622300 | -6.82664400 | -1.01288600 |
| H  | -0.36549200 | -5.46220300 | -0.29818100 |
| H  | -2.13073900 | -5.51452000 | -0.20341300 |

|   |             |             |             |
|---|-------------|-------------|-------------|
| C | 3.83733800  | -4.30035500 | -0.93957200 |
| C | 3.42573100  | -5.03480900 | 0.35151400  |
| H | 4.91959200  | -4.40303000 | -1.08162100 |
| H | 3.37156200  | -4.79541200 | -1.80161900 |
| H | 3.70543900  | -6.09387500 | 0.31038000  |
| H | 3.91284300  | -4.58463300 | 1.22400800  |
| H | 2.34392700  | -4.97181800 | 0.51126100  |
| C | 5.69088800  | -1.76871500 | -0.14854100 |
| C | 5.82904100  | -1.64432000 | 1.38203100  |
| H | 6.23325600  | -0.94377500 | -0.62883400 |
| H | 6.18314800  | -2.68988400 | -0.48131700 |
| H | 6.88194600  | -1.63146100 | 1.68650200  |
| H | 5.35627000  | -0.72322400 | 1.74155000  |
| H | 5.33728700  | -2.48654400 | 1.88258900  |
| C | 4.93004700  | 3.56888200  | 0.19322900  |
| C | 5.16115900  | 3.28126000  | 1.68996300  |
| H | 5.12816400  | 4.62884800  | -0.00429100 |
| H | 5.66349800  | 3.00761100  | -0.40085400 |
| H | 6.18631900  | 3.52954600  | 1.98849000  |
| H | 4.47181600  | 3.87003900  | 2.30580500  |
| H | 4.98506000  | 2.22313400  | 1.91522400  |
| C | 2.38627400  | 5.53966100  | -0.18570900 |
| C | 1.79899700  | 5.88737900  | 1.19693000  |
| H | 1.77617900  | 6.01091800  | -0.96734200 |
| H | 3.38607600  | 5.98078200  | -0.27457200 |
| H | 1.73785100  | 6.97230500  | 1.34042300  |
| H | 0.79224600  | 5.46953400  | 1.30929000  |
| H | 2.42203600  | 5.46954800  | 1.99601700  |
| C | -2.85691100 | 4.83024000  | -1.06998500 |
| C | -2.78679800 | 5.29466200  | 0.39866900  |
| H | -3.87474700 | 4.98268000  | -1.44679900 |
| H | -2.20922100 | 5.46876000  | -1.68688800 |
| H | -3.11472700 | 6.33692800  | 0.49073900  |
| H | -3.40731900 | 4.66299100  | 1.03913700  |
| H | -1.76397400 | 5.22266800  | 0.78441000  |
| C | -4.78148600 | 2.25616300  | -1.49242900 |
| C | -5.39152000 | 1.66651100  | -0.20407400 |
| H | -5.11514800 | 1.66826900  | -2.35900800 |
| H | -5.17011900 | 3.26916300  | -1.64529500 |
| H | -6.48452300 | 1.75515600  | -0.21458100 |
| H | -5.13971300 | 0.60514100  | -0.10745700 |
| H | -4.99798900 | 2.17234200  | 0.68267800  |
| C | 1.81096700  | -1.14627700 | 3.50666100  |
| C | 1.56342400  | -1.71539000 | 2.11919100  |

|   |             |             |            |
|---|-------------|-------------|------------|
| C | 0.62896100  | -2.84425100 | 2.04444700 |
| C | -0.22713000 | -3.15974700 | 3.04109800 |
| C | -0.19958700 | -2.43643600 | 4.36848800 |
| C | 0.51325000  | -1.07607900 | 4.32182800 |
| H | 2.53831700  | -1.80130400 | 4.01014600 |
| H | 1.05027100  | -0.81459000 | 1.41641500 |
| H | 0.57221000  | -3.37332100 | 1.09738000 |
| H | -1.22789600 | -2.30979500 | 4.73267900 |
| H | 0.72257700  | -0.72675700 | 5.33934000 |
| H | 2.47039200  | -1.84485300 | 1.52401200 |
| H | 2.27927500  | -0.15805900 | 3.43256500 |
| H | -0.15293800 | -0.33671100 | 3.86571500 |
| H | 0.29034300  | -3.09993600 | 5.10007700 |
| C | -1.27701000 | -4.22083800 | 2.87956700 |
| H | -2.25932500 | -3.73703800 | 2.76953100 |
| H | -1.10841900 | -4.83728800 | 1.99221200 |
| H | -1.33220600 | -4.87369100 | 3.76057600 |

#### osSTS20

|   |             |             |             |
|---|-------------|-------------|-------------|
| N | -0.26248100 | -2.02149600 | -1.25548800 |
| N | 1.50167200  | 0.24432300  | -1.63687200 |
| N | -0.73653600 | 2.04161400  | -1.25790400 |
| N | -2.52123000 | -0.23408400 | -0.98259300 |
| C | -1.24154000 | -2.96155100 | -1.03102700 |
| C | -0.64071200 | -4.28218300 | -0.93090600 |
| C | 0.70562200  | -4.11922800 | -1.12065700 |
| C | 0.92958600  | -2.69824400 | -1.33962100 |
| C | 2.16432900  | -2.11135200 | -1.59756800 |
| C | 2.43653200  | -0.75621500 | -1.74771000 |
| C | 3.74461500  | -0.17782300 | -2.01082700 |
| C | 3.57568600  | 1.18060700  | -2.04721000 |
| C | 2.16699800  | 1.43612200  | -1.80499100 |
| C | 1.58378300  | 2.69468600  | -1.71244200 |
| C | 0.25395300  | 2.98161700  | -1.41797900 |
| C | -0.29087000 | 4.30976900  | -1.19756700 |
| C | -1.62129700 | 4.14796700  | -0.90332400 |
| C | -1.89552100 | 2.72345100  | -0.96483800 |
| C | -3.13677600 | 2.13062500  | -0.74977000 |
| C | -3.43250000 | 0.77082200  | -0.75693500 |
| C | -4.73211400 | 0.19311100  | -0.46042400 |
| C | -4.58139900 | -1.16910900 | -0.51591600 |
| C | -3.18818100 | -1.42451100 | -0.83820200 |
| C | -2.59423000 | -2.68287400 | -0.88795000 |
| H | 2.24168400  | 3.54451900  | -1.85592500 |

|    |             |             |             |
|----|-------------|-------------|-------------|
| H  | 3.00812800  | -2.78679400 | -1.67473500 |
| H  | -3.24926800 | -3.53417100 | -0.74292600 |
| H  | -3.96246300 | 2.80258700  | -0.54253000 |
| C  | -0.79090600 | -0.02297200 | -3.38896700 |
| H  | -0.36899600 | 0.89485300  | -3.81157200 |
| H  | -0.27854100 | -0.89674900 | -3.80429400 |
| H  | -1.86274600 | -0.07784000 | -3.60464000 |
| C  | -0.80980000 | 0.25223900  | 1.51508500  |
| C  | -1.71372900 | -0.72324700 | 2.01579500  |
| C  | 0.56129900  | -0.05377300 | 1.43229400  |
| C  | -1.25995700 | -1.96833000 | 2.35302300  |
| H  | -2.77261700 | -0.48476600 | 2.07269400  |
| C  | 1.07049500  | -1.28792200 | 1.81709700  |
| H  | 1.26183500  | 0.70598100  | 1.11115900  |
| C  | 0.14619900  | -2.35795700 | 2.22997300  |
| O  | 0.48603200  | -3.53652500 | 2.46172500  |
| Ir | -0.51463500 | 0.00193400  | -1.34497200 |
| H  | -1.93267900 | -2.75104500 | 2.68940300  |
| C  | 2.54779300  | -1.40482600 | 1.83760400  |
| O  | 3.30854600  | -0.54487400 | 1.40479000  |
| O  | 2.99750900  | -2.52236200 | 2.43714000  |
| C  | 4.41987800  | -2.65189300 | 2.52953600  |
| H  | 4.86135000  | -2.78870200 | 1.53794200  |
| H  | 4.86563000  | -1.76746200 | 2.99469100  |
| H  | 4.58946300  | -3.53941600 | 3.14027600  |
| C  | 5.03193200  | -0.94186900 | -2.14320000 |
| C  | 5.89588300  | -0.87197900 | -0.86903500 |
| H  | 5.60667200  | -0.55100500 | -2.99354200 |
| H  | 4.82294700  | -1.99024100 | -2.38491000 |
| H  | 6.76136600  | -1.54167200 | -0.94194800 |
| H  | 6.26829900  | 0.14591500  | -0.71119500 |
| H  | 5.30313600  | -1.13658300 | 0.01049000  |
| C  | 4.62589400  | 2.23651700  | -2.24169400 |
| C  | 5.01726000  | 2.95757400  | -0.93670300 |
| H  | 4.27926500  | 2.98082200  | -2.97202900 |
| H  | 5.52055100  | 1.77694800  | -2.67831600 |
| H  | 5.81895400  | 3.68395400  | -1.11446700 |
| H  | 4.16185500  | 3.49295700  | -0.51236700 |
| H  | 5.35781100  | 2.23990800  | -0.18328800 |
| C  | 0.50995000  | 5.58026700  | -1.22536700 |
| C  | 1.34036200  | 5.79850400  | 0.05404500  |
| H  | -0.16235000 | 6.43466300  | -1.36638300 |
| H  | 1.18188500  | 5.57872800  | -2.09398400 |
| H  | 1.90830800  | 6.73472400  | 0.00410000  |



|   |             |             |             |
|---|-------------|-------------|-------------|
| H | 0.69124200  | 5.83762000  | 0.93631700  |
| H | 2.05036000  | 4.97724600  | 0.20135400  |
| C | -2.61771800 | 5.18926700  | -0.48405000 |
| C | -2.83262900 | 5.20680600  | 1.04294200  |
| H | -3.58061400 | 5.01589700  | -0.98263900 |
| H | -2.28078500 | 6.17966600  | -0.81154300 |
| H | -3.56417000 | 5.96934300  | 1.33448200  |
| H | -3.19444200 | 4.23346800  | 1.39463800  |
| H | -1.89026900 | 5.41782200  | 1.56184900  |
| C | -5.95008600 | 0.98205100  | -0.07493300 |
| C | -5.91279100 | 1.44731900  | 1.39436700  |
| H | -6.84918700 | 0.37603100  | -0.23722400 |
| H | -6.05315800 | 1.85807200  | -0.72905000 |
| H | -6.80337200 | 2.03395400  | 1.64835900  |
| H | -5.86534600 | 0.58572200  | 2.07002400  |
| H | -5.02852000 | 2.06620600  | 1.58497800  |
| C | -5.59119500 | -2.23260500 | -0.19453500 |
| C | -5.45187100 | -2.75848000 | 1.24823100  |
| H | -5.49079700 | -3.07076600 | -0.89635800 |
| H | -6.60383000 | -1.83722500 | -0.33793300 |
| H | -6.18321800 | -3.54828200 | 1.45518400  |
| H | -4.44925300 | -3.16561400 | 1.41962400  |
| H | -5.60790300 | -1.94874000 | 1.97022400  |
| C | -1.38968700 | -5.53222400 | -0.56872300 |
| C | -1.79680300 | -5.57223200 | 0.91892200  |
| H | -0.76687600 | -6.40535400 | -0.79376800 |
| H | -2.28609800 | -5.63083500 | -1.19716900 |
| H | -2.25436900 | -6.53617700 | 1.17130300  |
| H | -0.93095500 | -5.40101300 | 1.56487200  |
| H | -2.52233600 | -4.78297700 | 1.14557200  |
| C | 1.79347600  | -5.15083500 | -1.03738900 |
| C | 2.63607200  | -5.02920800 | 0.24819400  |
| H | 2.45081800  | -5.07369500 | -1.91539400 |
| H | 1.34687600  | -6.15054500 | -1.08315800 |
| H | 3.35525300  | -5.85420700 | 0.31930100  |
| H | 3.19283900  | -4.08756300 | 0.26070700  |
| H | 1.99871400  | -5.02200600 | 1.13617900  |
| C | 0.87261400  | 0.88281100  | 4.82667900  |
| C | 2.14653600  | 1.68159200  | 4.50100600  |
| C | 2.05583700  | 2.44646200  | 3.20557900  |
| C | 0.81777000  | 2.83652000  | 2.71739500  |
| C | -0.37561100 | 2.47660500  | 3.33836600  |
| C | -0.40029200 | 1.72327200  | 4.63443600  |
| H | 0.82136700  | 0.01730100  | 4.15971600  |

|   |             |            |            |
|---|-------------|------------|------------|
| H | 2.35596900  | 2.40232900 | 5.31032500 |
| H | -1.31374100 | 2.85492600 | 2.94069200 |
| H | -1.28882400 | 1.08192600 | 4.68132300 |
| H | 3.01445900  | 1.01032100 | 4.46865000 |
| H | 0.92205300  | 0.49707500 | 5.85094600 |
| H | -0.50649200 | 2.44981900 | 5.45982800 |
| H | -1.17827100 | 1.21262000 | 1.18703600 |
| H | 0.77130300  | 3.38816000 | 1.78012600 |
| C | 3.32102700  | 2.69789600 | 2.45494500 |
| H | 4.12448100  | 3.04824900 | 3.11741700 |
| H | 3.66199500  | 1.75037500 | 2.00722900 |
| H | 3.18685000  | 3.42322100 | 1.64756800 |

## 16

|   |             |             |             |
|---|-------------|-------------|-------------|
| C | 0.60202300  | 1.44153100  | -0.96567700 |
| C | -0.12456500 | 2.69041700  | -0.57150100 |
| C | -0.22628300 | 0.21157400  | -0.82045900 |
| C | -1.36277500 | 2.68400700  | -0.05661300 |
| H | 0.41442900  | 3.62849500  | -0.69876900 |
| C | -1.47123000 | 0.18330000  | -0.30368800 |
| H | 0.23933300  | -0.72589800 | -1.11379600 |
| C | -2.13167900 | 1.43667400  | 0.16749800  |
| O | -3.21734900 | 1.45932500  | 0.73465500  |
| H | -1.86890000 | 3.59632300  | 0.24653000  |
| C | -2.10755100 | -1.16348800 | -0.15569600 |
| O | -1.46820900 | -2.18546000 | 0.02466500  |
| O | -3.44177800 | -1.13337200 | -0.27988000 |
| C | -4.09994300 | -2.40159500 | -0.13242100 |
| H | -3.76925400 | -3.10007700 | -0.90699600 |
| H | -3.88273800 | -2.83371900 | 0.84855100  |
| H | -5.16445600 | -2.18871900 | -0.23245300 |
| C | 1.80768100  | 1.06455900  | 1.32650200  |
| C | 1.97712000  | 1.30122500  | -0.18968700 |
| C | 2.84776200  | 0.25315000  | -0.83788200 |
| C | 3.28143500  | -0.86687900 | -0.24253800 |
| C | 2.91771300  | -1.20365000 | 1.18801800  |
| C | 1.69821000  | -0.42243900 | 1.69291100  |
| H | 2.68538700  | 1.48620800  | 1.83446600  |
| H | 0.88786400  | 1.53174800  | -2.02832100 |
| H | 3.13848000  | 0.45085700  | -1.87095700 |
| H | 2.73491000  | -2.28347400 | 1.27395400  |
| H | 1.60786600  | -0.52836000 | 2.78063000  |
| H | 2.46677200  | 2.27670700  | -0.33121700 |
| H | 0.93564100  | 1.61688100  | 1.69549100  |

|   |            |             |             |
|---|------------|-------------|-------------|
| H | 0.78935400 | -0.85725700 | 1.26319000  |
| H | 3.79303300 | -1.00039000 | 1.82615800  |
| C | 4.18304400 | -1.84881000 | -0.94404600 |
| H | 3.70419800 | -2.83492500 | -1.01683900 |
| H | 4.44685700 | -1.51995900 | -1.95464600 |
| H | 5.11414500 | -1.99583700 | -0.37881900 |

**CSS**TS21

|   |             |             |             |
|---|-------------|-------------|-------------|
| C | 2.81326900  | 1.29741800  | -0.23265400 |
| C | 2.39389000  | 2.68190100  | -0.13151000 |
| C | 2.21658300  | 0.40209400  | 0.69900800  |
| C | 1.32037700  | 3.04186900  | 0.61797900  |
| H | 2.92025500  | 3.42307000  | -0.73141500 |
| C | 1.07717900  | 0.71094800  | 1.42008200  |
| H | 2.58461200  | -0.61628600 | 0.74358000  |
| C | 0.50693000  | 2.07014100  | 1.36199300  |
| O | -0.59112000 | 2.41234500  | 1.83113800  |
| H | 0.95522300  | 4.06468700  | 0.63910600  |
| C | 0.45214000  | -0.44065400 | 2.11747200  |
| O | 1.00554400  | -1.52042200 | 2.28022800  |
| O | -0.82917600 | -0.23448600 | 2.48786600  |
| C | -1.49795900 | -1.39484600 | 3.00864500  |
| H | -1.50254100 | -2.19490800 | 2.26211500  |
| H | -1.00525200 | -1.75368000 | 3.91651500  |
| H | -2.51468800 | -1.06440300 | 3.22779700  |
| C | 5.36051300  | 1.37354200  | 0.01270300  |
| C | 4.16377800  | 0.98783600  | -0.89133200 |
| C | 4.26734100  | -0.45109200 | -1.34503200 |
| C | 5.09215800  | -1.36213800 | -0.80895200 |
| C | 5.99897800  | -1.03636800 | 0.36014200  |
| C | 5.63954400  | 0.28527600  | 1.05306100  |
| H | 1.79184500  | 0.90217100  | -1.23633900 |
| H | 3.61185200  | -0.73946100 | -2.16682800 |
| H | 5.97063900  | -1.86447800 | 1.08267700  |
| H | 4.74981600  | 0.14322200  | 1.67938000  |
| H | 4.21092600  | 1.62033700  | -1.79100000 |
| H | 6.25036100  | 1.50394800  | -0.61894700 |
| H | 7.03892300  | -1.00041100 | -0.00328100 |
| C | 5.20422100  | -2.76506500 | -1.34927100 |
| H | 4.92810000  | -3.50775700 | -0.58744800 |
| H | 4.57028300  | -2.92087500 | -2.22874700 |
| H | 6.24114500  | -2.98863300 | -1.63739900 |
| C | -2.83833600 | 1.33882500  | -0.06255500 |
| C | -2.12989200 | 2.41640700  | -0.81077200 |

|   |             |             |             |
|---|-------------|-------------|-------------|
| C | -2.16280700 | 0.02379200  | -0.17095400 |
| C | -0.96917000 | 2.20744800  | -1.46627800 |
| H | -2.58490300 | 3.40409600  | -0.80756600 |
| C | -0.97769200 | -0.19294400 | -0.79630700 |
| H | -2.65160000 | -0.81961400 | 0.30386300  |
| C | -0.28425200 | 0.93208300  | -1.41967100 |
| O | 0.87483800  | 0.84023300  | -1.97189300 |
| H | -0.44527700 | 3.00431900  | -1.98301800 |
| C | -0.45229500 | -1.59538300 | -0.71004100 |
| O | -1.15071700 | -2.53622100 | -0.37496500 |
| O | 0.85401000  | -1.70087800 | -0.97740200 |
| C | 1.43908200  | -2.98216000 | -0.66850100 |
| H | 1.30875700  | -3.18694200 | 0.39669900  |
| H | 0.97268800  | -3.77063900 | -1.26453900 |
| H | 2.49356600  | -2.87261700 | -0.91422900 |
| C | -4.66725900 | 0.87031900  | -1.86659900 |
| C | -4.37696000 | 1.26766900  | -0.40447900 |
| C | -5.08787400 | 0.37032300  | 0.57785000  |
| C | -5.68911200 | -0.78649100 | 0.26532100  |
| C | -5.72222600 | -1.31452300 | -1.15406100 |
| C | -4.68418400 | -0.65055200 | -2.06871600 |
| H | -2.77681900 | 1.60792100  | 1.00613600  |
| H | -5.08702900 | 0.70681500  | 1.61536200  |
| H | -5.57202300 | -2.40278700 | -1.14210100 |
| H | -3.69349500 | -1.06895600 | -1.85567400 |
| H | -4.73854300 | 2.29487900  | -0.24939800 |
| H | -5.65166000 | 1.27258500  | -2.14082300 |
| H | -6.73616700 | -1.16160200 | -1.55763600 |
| C | -6.39856900 | -1.62459500 | 1.29655500  |
| H | -5.94065400 | -2.62043000 | 1.37198100  |
| H | -6.37927100 | -1.16199200 | 2.28874900  |
| H | -7.44875500 | -1.78506600 | 1.01487100  |
| H | 5.16305600  | 2.33717000  | 0.49691000  |
| H | 6.45014600  | 0.59222700  | 1.72448800  |
| H | -3.93522600 | 1.33996300  | -2.53483700 |
| H | -4.89970500 | -0.88693300 | -3.11752600 |

**CSS TS22**

|   |             |             |             |
|---|-------------|-------------|-------------|
| N | -0.02025300 | -1.92470800 | -1.21331600 |
| N | 1.14482300  | 0.72180800  | -1.54300100 |
| N | -1.42671700 | 1.91468200  | -0.90901200 |
| N | -2.59748600 | -0.72596600 | -0.60250500 |
| C | -0.75046900 | -3.07528700 | -1.04724300 |
| C | 0.11957800  | -4.23005400 | -1.19479600 |

|    |             |             |             |
|----|-------------|-------------|-------------|
| C  | 1.37388400  | -3.74749300 | -1.46792800 |
| C  | 1.26976800  | -2.29720400 | -1.49795300 |
| C  | 2.31034100  | -1.41949900 | -1.79384800 |
| C  | 2.25571900  | -0.03021800 | -1.83365600 |
| C  | 3.35444000  | 0.84944000  | -2.20841900 |
| C  | 2.87143000  | 2.13030200  | -2.14816700 |
| C  | 1.47993900  | 2.03662700  | -1.73368400 |
| C  | 0.61658700  | 3.11469600  | -1.55960000 |
| C  | -0.71730600 | 3.06546400  | -1.16160900 |
| C  | -1.56095100 | 4.21881100  | -0.90739100 |
| C  | -2.78210100 | 3.73599600  | -0.50009500 |
| C  | -2.69343600 | 2.28824400  | -0.52556600 |
| C  | -3.73039300 | 1.41207800  | -0.21535700 |
| C  | -3.69449500 | 0.02115800  | -0.26019700 |
| C  | -4.80339600 | -0.86347700 | 0.06188600  |
| C  | -4.34922100 | -2.14552500 | -0.11276300 |
| C  | -2.96062500 | -2.04567000 | -0.53231900 |
| C  | -2.11098500 | -3.12412300 | -0.76151100 |
| H  | 1.02953900  | 4.10051700  | -1.74387700 |
| H  | 3.26753000  | -1.87103000 | -2.02628600 |
| H  | -2.54883600 | -4.11168000 | -0.67467500 |
| H  | -4.67384000 | 1.86281200  | 0.07215600  |
| C  | -1.16790800 | -0.04180200 | -3.09875900 |
| H  | -0.34159600 | -0.51576000 | -3.64043600 |
| H  | -2.09045700 | -0.60654600 | -3.27437700 |
| H  | -1.29400700 | 0.98420800  | -3.46358200 |
| C  | -0.23826900 | -0.11893400 | 1.15781600  |
| C  | -1.08150200 | -1.02118400 | 1.91592700  |
| C  | 1.17437200  | -0.26927700 | 1.33202700  |
| C  | -0.57906200 | -2.23487000 | 2.25282900  |
| H  | -2.13756900 | -0.79523700 | 2.03020600  |
| C  | 1.73013700  | -1.46576300 | 1.68821500  |
| H  | 1.82905800  | 0.55920500  | 1.08432500  |
| C  | 0.83863900  | -2.59710800 | 2.04541700  |
| O  | 1.21702000  | -3.76330900 | 2.18564000  |
| Ir | -0.72110000 | -0.00417200 | -1.04302000 |
| H  | -1.21264500 | -3.03382800 | 2.62692800  |
| C  | 3.21205100  | -1.50982000 | 1.74203400  |
| O  | 3.92905900  | -0.60426500 | 1.33443300  |
| O  | 3.70580100  | -2.60644000 | 2.34018400  |
| C  | 5.13516700  | -2.65761500 | 2.43984600  |
| H  | 5.58999900  | -2.66012800 | 1.44485000  |
| H  | 5.51669700  | -1.79887000 | 3.00023400  |
| H  | 5.35428000  | -3.58963700 | 2.96150000  |

|   |             |             |             |
|---|-------------|-------------|-------------|
| C | 4.74519000  | 0.40547000  | -2.56161300 |
| C | 5.69192700  | 0.36413100  | -1.34656800 |
| H | 5.15989600  | 1.08047600  | -3.32119000 |
| H | 4.71177800  | -0.58545000 | -3.03101700 |
| H | 6.68520900  | 0.00348500  | -1.64035400 |
| H | 5.80744600  | 1.36563400  | -0.91632100 |
| H | 5.29516200  | -0.28073900 | -0.55824400 |
| C | 3.59966200  | 3.41350900  | -2.42791800 |
| C | 4.02572700  | 4.16400200  | -1.15175400 |
| H | 2.96935200  | 4.07329800  | -3.03956200 |
| H | 4.49051700  | 3.20166400  | -3.03070000 |
| H | 4.55535400  | 5.09170300  | -1.39805300 |
| H | 3.15600300  | 4.42121500  | -0.53746600 |
| H | 4.68748800  | 3.54175400  | -0.54015000 |
| C | -1.12799200 | 5.65195400  | -1.03406800 |
| C | -0.34967200 | 6.16461600  | 0.19276200  |
| H | -2.00933300 | 6.28590700  | -1.18714800 |
| H | -0.50902100 | 5.77569800  | -1.93219400 |
| H | -0.07602800 | 7.21926300  | 0.07306700  |
| H | -0.95238400 | 6.06747200  | 1.10290700  |
| H | 0.57066200  | 5.59086900  | 0.34429800  |
| C | -3.98398200 | 4.51051500  | -0.04262600 |
| C | -4.10960100 | 4.54673300  | 1.49339900  |
| H | -4.89648300 | 4.07479700  | -0.47022500 |
| H | -3.93054000 | 5.53691400  | -0.42379800 |
| H | -4.99858600 | 5.10676100  | 1.80559500  |
| H | -4.18164600 | 3.53242900  | 1.90204500  |
| H | -3.22915300 | 5.02226800  | 1.94065900  |
| C | -6.14313100 | -0.40637400 | 0.56177800  |
| C | -6.11609700 | -0.01684200 | 2.05294000  |
| H | -6.88404000 | -1.20005100 | 0.41045800  |
| H | -6.49197100 | 0.45051200  | -0.02987000 |
| H | -7.10140500 | 0.32337100  | 2.39221800  |
| H | -5.81721900 | -0.87256700 | 2.66899100  |
| H | -5.39469800 | 0.78853800  | 2.23242500  |
| C | -5.06409400 | -3.43583200 | 0.16573900  |
| C | -4.68569100 | -4.03160100 | 1.53657200  |
| H | -4.83995600 | -4.16744600 | -0.62153500 |
| H | -6.14786400 | -3.27412400 | 0.12933400  |
| H | -5.20709900 | -4.97913600 | 1.71456400  |
| H | -3.60741100 | -4.21724000 | 1.59706400  |
| H | -4.94817400 | -3.33794900 | 2.34355900  |
| C | -0.31611300 | -5.65319500 | -0.99433500 |
| C | -0.54986500 | -6.01173300 | 0.48721100  |

|   |             |             |             |
|---|-------------|-------------|-------------|
| H | 0.44153400  | -6.32653200 | -1.41099200 |
| H | -1.23509900 | -5.84393300 | -1.56621500 |
| H | -0.81503600 | -7.07057100 | 0.59130800  |
| H | 0.34004200  | -5.80057600 | 1.08523300  |
| H | -1.36329600 | -5.41326600 | 0.91215100  |
| C | 2.65507900  | -4.51474900 | -1.62176900 |
| C | 3.59037500  | -4.35297700 | -0.40624400 |
| H | 3.17932100  | -4.19568800 | -2.53365500 |
| H | 2.42505000  | -5.57693200 | -1.76089900 |
| H | 4.45722100  | -5.01930300 | -0.49103800 |
| H | 3.96055400  | -3.32487700 | -0.33593300 |
| H | 3.05985200  | -4.56561700 | 0.52625200  |
| C | 3.45153000  | 2.94813000  | 3.75581600  |
| C | 3.14304700  | 3.34553600  | 2.30504800  |
| C | 1.69660200  | 3.15099000  | 1.95129600  |
| C | 0.82973100  | 2.42230600  | 2.69069500  |
| C | 1.26141900  | 1.70847100  | 3.95808200  |
| C | 2.78829400  | 1.60488700  | 4.08559700  |
| H | 1.34956400  | 3.57365000  | 1.01131900  |
| H | 0.84194400  | 2.24073300  | 4.82595100  |
| H | 0.81174600  | 0.70668000  | 3.97312400  |
| C | -0.53383800 | 2.18673000  | 2.21436600  |
| H | -1.26254300 | 1.88721200  | 2.96975400  |
| H | -0.93516000 | 2.90944300  | 1.50418500  |
| H | -0.53539200 | 1.16552800  | 1.44593200  |
| H | 3.05698700  | 1.27297500  | 5.09528000  |
| H | 3.16153900  | 0.84736900  | 3.38510800  |
| H | 4.53587500  | 2.89285100  | 3.90568400  |
| H | 3.07167700  | 3.72259700  | 4.43696600  |
| H | 3.74201900  | 2.72824800  | 1.61610700  |
| H | 3.44204100  | 4.38387200  | 2.10607100  |

### OSS<sup>TS23</sup>

|   |             |             |             |
|---|-------------|-------------|-------------|
| N | -1.71786000 | -1.14845100 | -1.19847300 |
| N | 1.13791000  | -0.86507800 | -1.59191900 |
| N | 0.91571100  | 1.98019100  | -1.12885900 |
| N | -1.95684500 | 1.70582500  | -0.80413600 |
| C | -3.07764800 | -1.08381900 | -0.99817000 |
| C | -3.63472500 | -2.42681700 | -0.97184400 |
| C | -2.59130500 | -3.29127500 | -1.17192100 |
| C | -1.39585300 | -2.47733400 | -1.33237700 |
| C | -0.12044400 | -2.96543500 | -1.59701200 |
| C | 1.05110000  | -2.22918200 | -1.73229400 |
| C | 2.36236500  | -2.77411600 | -2.04385200 |

|    |             |             |             |
|----|-------------|-------------|-------------|
| C  | 3.22932500  | -1.71470800 | -2.09537300 |
| C  | 2.45302600  | -0.52111900 | -1.80761400 |
| C  | 2.95991200  | 0.77217900  | -1.74075500 |
| C  | 2.26329700  | 1.92762300  | -1.39731800 |
| C  | 2.84887400  | 3.24610700  | -1.22540200 |
| C  | 1.83490800  | 4.07955100  | -0.82434500 |
| C  | 0.62177400  | 3.28207700  | -0.79255000 |
| C  | -0.65145200 | 3.76176700  | -0.49784300 |
| C  | -1.84384500 | 3.04403000  | -0.50765800 |
| C  | -3.15179200 | 3.58171000  | -0.17524400 |
| C  | -4.04624800 | 2.54810400  | -0.29255300 |
| C  | -3.28342600 | 1.37496300  | -0.68185300 |
| C  | -3.79879600 | 0.08777800  | -0.80733700 |
| H  | 4.01780900  | 0.88828800  | -1.94875000 |
| H  | -0.03202500 | -4.03955800 | -1.70869400 |
| H  | -4.87001400 | -0.01991800 | -0.68215600 |
| H  | -0.72424800 | 4.81433400  | -0.24667600 |
| C  | -0.64671000 | 0.69582700  | -3.26786200 |
| H  | 0.32725500  | 0.95096100  | -3.69810000 |
| H  | -1.02092500 | -0.23348400 | -3.70874400 |
| H  | -1.35930500 | 1.50863500  | -3.43914300 |
| C  | -0.49146000 | 0.66575400  | 1.69846900  |
| C  | -1.84675600 | 0.66630700  | 2.12163100  |
| C  | 0.21542500  | -0.55412200 | 1.61756600  |
| C  | -2.47982900 | -0.51694600 | 2.38496100  |
| H  | -2.38512900 | 1.60845500  | 2.17445300  |
| C  | -0.38137300 | -1.76809100 | 1.91291900  |
| H  | 1.26058600  | -0.54580400 | 1.33194600  |
| C  | -1.81278400 | -1.81251300 | 2.25432900  |
| O  | -2.46339600 | -2.86630800 | 2.41084700  |
| Ir | -0.41514600 | 0.42184800  | -1.23716200 |
| H  | -3.52863700 | -0.55639100 | 2.66138600  |
| C  | 0.50087400  | -2.96224700 | 1.86866100  |
| O  | 1.61591300  | -2.96064600 | 1.36263100  |
| O  | -0.00563600 | -4.03908800 | 2.49340800  |
| C  | 0.84706600  | -5.19035100 | 2.52612100  |
| H  | 1.02317900  | -5.57139200 | 1.51602200  |
| H  | 1.81060000  | -4.94782200 | 2.98434600  |
| H  | 0.30931700  | -5.93014700 | 3.11987900  |
| C  | 2.68612700  | -4.23175000 | -2.21033100 |
| C  | 3.26316300  | -4.86056500 | -0.92712300 |
| H  | 3.40421600  | -4.35758200 | -3.03125000 |
| H  | 1.78868800  | -4.78296100 | -2.51499100 |
| H  | 3.39919200  | -5.94228600 | -1.04676700 |



|   |             |             |             |
|---|-------------|-------------|-------------|
| H | 4.23749300  | -4.41989600 | -0.68848300 |
| H | 2.60656000  | -4.66808600 | -0.07459000 |
| C | 4.70845500  | -1.74640600 | -2.35556700 |
| C | 5.56314000  | -1.55435200 | -1.08739500 |
| H | 4.97705900  | -0.97296100 | -3.08855900 |
| H | 4.96933900  | -2.70550500 | -2.81820200 |
| H | 6.63056300  | -1.65922500 | -1.31435400 |
| H | 5.40703800  | -0.56176500 | -0.65287500 |
| H | 5.29665300  | -2.29305500 | -0.32383000 |
| C | 4.29677700  | 3.58249900  | -1.44546300 |
| C | 5.21663500  | 3.15463700  | -0.28767300 |
| H | 4.39792600  | 4.66263000  | -1.60316700 |
| H | 4.64607200  | 3.10928900  | -2.37299800 |
| H | 6.25798600  | 3.43192300  | -0.48829900 |
| H | 4.91009500  | 3.63101300  | 0.65062000  |
| H | 5.17526900  | 2.07151200  | -0.13886500 |
| C | 1.91790800  | 5.52028500  | -0.41167400 |
| C | 1.91198300  | 5.68722900  | 1.12111900  |
| H | 1.08068500  | 6.08650700  | -0.84082600 |
| H | 2.82982600  | 5.97189000  | -0.81911400 |
| H | 1.96641200  | 6.74392700  | 1.40736400  |
| H | 0.99931500  | 5.26217700  | 1.55502200  |
| H | 2.76587800  | 5.16541800  | 1.56853900  |
| C | -3.40429500 | 4.98640800  | 0.29087900  |
| C | -3.01807400 | 5.19656800  | 1.76843400  |
| H | -4.46346400 | 5.23537000  | 0.15674500  |
| H | -2.84489100 | 5.69592600  | -0.33339200 |
| H | -3.19475500 | 6.23199400  | 2.08200400  |
| H | -3.60508300 | 4.53685300  | 2.41763000  |
| H | -1.95942400 | 4.96454700  | 1.93145400  |
| C | -5.51354200 | 2.54463700  | 0.02557900  |
| C | -5.80747400 | 2.00498300  | 1.43965000  |
| H | -6.05672600 | 1.94024200  | -0.71251600 |
| H | -5.91380400 | 3.56161000  | -0.06244000 |
| H | -6.88425600 | 1.99252600  | 1.64396800  |
| H | -5.42496800 | 0.98474500  | 1.55448800  |
| H | -5.32152300 | 2.62840600  | 2.19893900  |
| C | -5.07222800 | -2.74725400 | -0.67774500 |
| C | -5.44016100 | -2.55696200 | 0.80801300  |
| H | -5.27770000 | -3.78399600 | -0.96730100 |
| H | -5.73000600 | -2.12469100 | -1.30052000 |
| H | -6.46941100 | -2.88361900 | 0.99796900  |
| H | -4.75723700 | -3.11574100 | 1.45370100  |
| H | -5.36043600 | -1.50340400 | 1.09813400  |

|   |             |             |             |
|---|-------------|-------------|-------------|
| C | -2.60442500 | -4.79261400 | -1.15511200 |
| C | -1.95696900 | -5.38133600 | 0.11432400  |
| H | -2.08765400 | -5.18194000 | -2.04402000 |
| H | -3.63914600 | -5.14559200 | -1.22946300 |
| H | -2.07058500 | -6.47183500 | 0.13764500  |
| H | -0.88821200 | -5.14936200 | 0.14704100  |
| H | -2.39767600 | -4.94916700 | 1.01654200  |
| C | 4.70024100  | -0.54159400 | 3.25800900  |
| C | 4.42174900  | 0.44641600  | 2.11608000  |
| C | 3.25151800  | 1.34135000  | 2.38775400  |
| C | 2.31201800  | 1.10444400  | 3.37707000  |
| C | 2.43393200  | -0.11537500 | 4.28255700  |
| C | 3.39195500  | -1.18281800 | 3.73305000  |
| H | 3.10539000  | 2.19135200  | 1.72198100  |
| H | 2.78133900  | 0.21797300  | 5.27150900  |
| H | 1.43624700  | -0.54540900 | 4.43530200  |
| C | 1.20912000  | 1.94801600  | 3.53111200  |
| H | 0.46298700  | 1.77220900  | 4.29901100  |
| H | 1.11748700  | 2.86142000  | 2.95002900  |
| H | -0.02024600 | 1.58676000  | 1.38923600  |
| H | 3.58708400  | -1.93439400 | 4.50770200  |
| H | 2.92411500  | -1.70721400 | 2.89166500  |
| H | 5.40901200  | -1.30704700 | 2.92081800  |
| H | 5.17526900  | -0.00955300 | 4.09444500  |
| H | 4.21301800  | -0.11317600 | 1.18938400  |
| H | 5.31293700  | 1.05087400  | 1.89805600  |

## 17

|   |             |             |             |
|---|-------------|-------------|-------------|
| C | 0.25602500  | 1.54260900  | -0.39161000 |
| C | -0.62008200 | 2.74344600  | -0.20629500 |
| C | -0.49384700 | 0.25267600  | -0.33190100 |
| C | -1.93062600 | 2.65419800  | 0.06051400  |
| H | -0.13505400 | 3.71645300  | -0.27345700 |
| C | -1.81548900 | 0.14285800  | -0.08775600 |
| H | 0.08509300  | -0.65649500 | -0.47122300 |
| C | -2.64104700 | 1.35906500  | 0.18788200  |
| O | -3.81568000 | 1.32239500  | 0.53225300  |
| H | -2.54969800 | 3.53266200  | 0.21975700  |
| C | -2.37964500 | -1.24749600 | -0.07038500 |
| O | -1.70556500 | -2.24215700 | 0.12784700  |
| O | -3.69158500 | -1.28544000 | -0.34668300 |
| C | -4.27590300 | -2.59703300 | -0.35617200 |
| H | -3.81077800 | -3.22130500 | -1.12513400 |
| H | -4.14710600 | -3.08155400 | 0.61595600  |

|   |             |             |             |
|---|-------------|-------------|-------------|
| H | -5.33314700 | -2.44097800 | -0.57183100 |
| C | 4.72073100  | -1.27991100 | 0.00856200  |
| C | 3.54911800  | -1.73610700 | 0.89157000  |
| C | 2.53063400  | -0.64281200 | 1.09841000  |
| C | 2.47827400  | 0.49018500  | 0.38343000  |
| C | 3.45924800  | 0.77185200  | -0.73824500 |
| C | 4.20581500  | -0.48813400 | -1.19963300 |
| H | 1.78960500  | -0.80802700 | 1.88077000  |
| H | 2.93647400  | 1.22978600  | -1.59040200 |
| H | 4.17964500  | 1.53257700  | -0.39688100 |
| C | 1.43162000  | 1.54677500  | 0.65002500  |
| H | 0.99707600  | 1.42395500  | 1.64809900  |
| H | 1.89346800  | 2.54396200  | 0.61870100  |
| H | 0.72569700  | 1.60849300  | -1.38822600 |
| H | 3.52032000  | -1.12164000 | -1.77991500 |
| H | 5.03050100  | -0.21398700 | -1.86837200 |
| H | 5.39094500  | -0.63794900 | 0.59724100  |
| H | 5.31125400  | -2.14516200 | -0.31515500 |
| H | 3.91841200  | -2.08524100 | 1.86554100  |
| H | 3.05098600  | -2.60695300 | 0.43681500  |

#### CSST24

|   |             |             |             |
|---|-------------|-------------|-------------|
| C | 2.28481700  | 1.32535000  | -0.69292800 |
| C | 1.98117900  | 0.20960700  | -1.56522900 |
| C | 1.20856700  | 2.22599000  | -0.44482800 |
| C | 0.70434300  | -0.07821500 | -1.93786000 |
| H | 2.80555100  | -0.42891200 | -1.87544100 |
| C | -0.10939800 | 1.93623100  | -0.74552100 |
| H | 1.40814300  | 3.13470900  | 0.11861700  |
| C | -0.44425400 | 0.69448900  | -1.46670300 |
| O | -1.59686700 | 0.23663000  | -1.59309300 |
| H | 0.46432800  | -0.96114700 | -2.52219600 |
| C | -1.11460500 | 2.90701600  | -0.24309300 |
| O | -0.87027600 | 3.79183100  | 0.56249400  |
| O | -2.35788800 | 2.72990200  | -0.75263300 |
| C | -3.34617500 | 3.64973000  | -0.27337800 |
| H | -3.45152300 | 3.57602900  | 0.81417700  |
| H | -3.07736000 | 4.67951300  | -0.52620500 |
| H | -4.27410800 | 3.35969000  | -0.76774900 |
| H | 2.02984300  | 0.66220900  | 0.61687000  |
| C | -2.42599600 | 0.07659400  | 1.47416800  |
| C | -1.55500400 | -0.99318600 | 0.92055100  |
| C | -1.75234400 | 0.91017400  | 2.51457600  |
| C | -0.20285700 | -1.00504400 | 1.07457400  |

|   |             |             |             |
|---|-------------|-------------|-------------|
| H | -2.02182500 | -1.77036800 | 0.32560200  |
| C | -0.41180000 | 0.92525300  | 2.64228000  |
| H | -2.37000000 | 1.59310600  | 3.09341000  |
| C | 0.42322700  | 0.09395300  | 1.79004200  |
| O | 1.67041500  | 0.38716100  | 1.71129100  |
| H | -2.55992500 | 0.76221100  | 0.61469000  |
| H | 0.10645600  | 1.61793600  | 3.29691700  |
| C | 0.54213500  | -2.12430500 | 0.41541700  |
| O | 0.00703000  | -2.95655200 | -0.28869700 |
| O | 1.85626300  | -2.14712400 | 0.71441800  |
| C | 2.60213400  | -3.19720200 | 0.07773300  |
| H | 2.59249900  | -3.06078400 | -1.00778400 |
| H | 3.61657800  | -3.10798900 | 0.46579400  |
| H | 2.17658800  | -4.17484100 | 0.31789500  |
| C | 6.43263700  | -1.57852900 | -0.15653300 |
| C | 6.69869900  | -0.60426000 | -1.31349600 |
| C | 5.64769700  | 0.47527400  | -1.39846600 |
| C | 4.76786400  | 0.75711200  | -0.42628300 |
| C | 4.76036900  | 0.00067800  | 0.88789900  |
| C | 6.04657200  | -0.80827300 | 1.11235700  |
| H | 5.62419900  | 1.06090300  | -2.31798000 |
| H | 4.60684200  | 0.70879800  | 1.71412400  |
| H | 3.88737200  | -0.66439200 | 0.92346100  |
| C | 3.72728200  | 1.84113000  | -0.59985500 |
| H | 3.78181300  | 2.54334800  | 0.24474800  |
| H | 3.95496500  | 2.42221500  | -1.50395300 |
| H | 6.86633900  | -0.12596200 | 1.37734800  |
| H | 5.91635300  | -1.49183800 | 1.96042000  |
| H | 5.60847100  | -2.25000000 | -0.43617200 |
| H | 7.31157000  | -2.21019500 | 0.02021400  |
| H | 6.74869300  | -1.14834100 | -2.26689900 |
| H | 7.68952500  | -0.13848700 | -1.18855400 |
| C | -5.48978400 | -1.91495600 | -1.91408200 |
| C | -5.55525700 | -2.85442600 | -0.70027400 |
| C | -4.90067500 | -2.24814500 | 0.51643700  |
| C | -4.58312700 | -0.95050400 | 0.63204400  |
| C | -4.87481800 | 0.05163600  | -0.46921600 |
| C | -5.87368300 | -0.48821500 | -1.50329400 |
| H | -4.67156600 | -2.92572800 | 1.33992700  |
| H | -5.25711400 | 0.98134800  | -0.01986400 |
| H | -3.93649500 | 0.32237600  | -0.97394600 |
| C | -3.85323000 | -0.42237300 | 1.84434200  |
| H | -4.39718300 | 0.43224700  | 2.27236100  |
| H | -3.78221500 | -1.18684900 | 2.62689100  |

|   |             |             |             |
|---|-------------|-------------|-------------|
| H | -6.88588000 | -0.49482700 | -1.07396100 |
| H | -5.89895100 | 0.17443500  | -2.37637700 |
| H | -4.46564500 | -1.90598100 | -2.31077100 |
| H | -6.14459200 | -2.28259600 | -2.71331800 |
| H | -5.07363100 | -3.81393000 | -0.93311000 |
| H | -6.60461300 | -3.09818700 | -0.46771400 |

**OSS**TS25

|   |             |             |             |
|---|-------------|-------------|-------------|
| N | -1.13978800 | -1.79914200 | -1.27200600 |
| N | 1.47262300  | -0.58567700 | -1.64188300 |
| N | 0.32617100  | 2.03274300  | -1.16322500 |
| N | -2.29867300 | 0.82620300  | -0.82777200 |
| C | -2.44422000 | -2.17631300 | -1.06614200 |
| C | -2.53224700 | -3.62802200 | -1.03742700 |
| C | -1.26322700 | -4.10467400 | -1.23931500 |
| C | -0.40048600 | -2.94489400 | -1.39849600 |
| C | 0.97765500  | -2.98785500 | -1.59460600 |
| C | 1.84478300  | -1.90643700 | -1.69588400 |
| C | 3.28899500  | -2.00027100 | -1.83624700 |
| C | 3.76611900  | -0.71748000 | -1.89265500 |
| C | 2.61702400  | 0.16336100  | -1.75008500 |
| C | 2.67947100  | 1.54977000  | -1.64611100 |
| C | 1.62743200  | 2.41701200  | -1.36666300 |
| C | 1.74249000  | 3.86012800  | -1.21433500 |
| C | 0.48452900  | 4.32958800  | -0.94449200 |
| C | -0.40115700 | 3.17547500  | -0.93197100 |
| C | -1.77527300 | 3.22087500  | -0.72518500 |
| C | -2.65568900 | 2.14110000  | -0.68229000 |
| C | -4.09351200 | 2.23918800  | -0.48799200 |
| C | -4.58946600 | 0.96127900  | -0.55821400 |
| C | -3.45051800 | 0.08356600  | -0.77660600 |
| C | -3.51090000 | -1.30338700 | -0.87947000 |
| H | 3.65983900  | 1.99940800  | -1.75602900 |
| H | 1.42604900  | -3.97299700 | -1.65834300 |
| H | -4.49330500 | -1.75347400 | -0.78590500 |
| H | -2.20970100 | 4.20454100  | -0.58388800 |
| C | -0.92585700 | 0.38609400  | -3.24532200 |
| H | -0.07163700 | 0.08779300  | -3.86391400 |
| H | -1.79419000 | -0.23752500 | -3.48352700 |
| H | -1.16616700 | 1.43960200  | -3.42519600 |
| C | 0.25182000  | -0.30605400 | 0.97291900  |
| C | 0.03872700  | -1.60866400 | 1.46389300  |
| C | 1.44377700  | 0.32291800  | 1.32289600  |
| C | 1.04972100  | -2.31732300 | 2.10300600  |

|    |             |             |             |
|----|-------------|-------------|-------------|
| H  | -0.92080500 | -2.09197700 | 1.30610500  |
| C  | 2.49116800  | -0.36045500 | 1.97096300  |
| H  | 1.63531600  | 1.34936900  | 1.03154700  |
| C  | 2.29592500  | -1.72140800 | 2.33954400  |
| O  | 3.23636300  | -2.49696600 | 2.92892300  |
| Ir | -0.40171900 | 0.11554200  | -1.21134700 |
| H  | 0.90513100  | -3.34256000 | 2.43076400  |
| C  | 3.73361700  | 0.40276500  | 2.19687600  |
| O  | 3.89685100  | 1.58526600  | 1.96838800  |
| O  | 4.75473200  | -0.36085600 | 2.71652400  |
| C  | 5.97929400  | 0.34157400  | 2.99659800  |
| H  | 6.40324200  | 0.74368700  | 2.07414500  |
| H  | 5.79470000  | 1.16095300  | 3.69577100  |
| H  | 6.64687200  | -0.40041500 | 3.43582300  |
| C  | 4.06778900  | -3.28088800 | -1.76500000 |
| C  | 4.19989600  | -3.78553800 | -0.31277600 |
| H  | 5.06738900  | -3.13377700 | -2.19098300 |
| H  | 3.58750700  | -4.05625200 | -2.37672700 |
| H  | 4.76951900  | -4.72131300 | -0.26749500 |
| H  | 4.70606300  | -3.04137900 | 0.31207100  |
| H  | 3.21505300  | -3.95706100 | 0.13408100  |
| C  | 5.19373200  | -0.26154600 | -1.98656800 |
| C  | 5.79428100  | 0.11709800  | -0.61919100 |
| H  | 5.26683700  | 0.60033200  | -2.66308700 |
| H  | 5.80085300  | -1.05388600 | -2.44030300 |
| H  | 6.84280200  | 0.42298200  | -0.72079600 |
| H  | 5.23722600  | 0.93966800  | -0.16067900 |
| H  | 5.74843400  | -0.73467700 | 0.06901100  |
| C  | 3.03450700  | 4.62287100  | -1.25504000 |
| C  | 3.77949300  | 4.58181300  | 0.09440400  |
| H  | 2.84038500  | 5.66609500  | -1.53275400 |
| H  | 3.68342900  | 4.21768000  | -2.04242100 |
| H  | 4.74372500  | 5.10017600  | 0.02694000  |
| H  | 3.18387100  | 5.07034600  | 0.87425600  |
| H  | 3.95564000  | 3.55229700  | 0.42080500  |
| C  | 0.06092200  | 5.73364100  | -0.62454100 |
| C  | -0.14705200 | 5.95846100  | 0.88645200  |
| H  | -0.86810400 | 5.97817200  | -1.15739200 |
| H  | 0.81571700  | 6.43857900  | -0.99232300 |
| H  | -0.45672500 | 6.98934900  | 1.09505000  |
| H  | -0.91527100 | 5.28323600  | 1.27988400  |
| H  | 0.77966300  | 5.75851100  | 1.43579200  |
| C  | -4.82935200 | 3.51449100  | -0.19490300 |
| C  | -4.66291700 | 3.96378800  | 1.27044000  |

|   |             |             |             |
|---|-------------|-------------|-------------|
| H | -5.89611600 | 3.38636400  | -0.41275900 |
| H | -4.47816700 | 4.31397600  | -0.86063300 |
| H | -5.20157700 | 4.89895200  | 1.46329800  |
| H | -5.04737100 | 3.19771700  | 1.95369200  |
| H | -3.60574800 | 4.12084700  | 1.51276800  |
| C | -6.01480600 | 0.50850700  | -0.41445800 |
| C | -6.33151000 | -0.10247700 | 0.96401200  |
| H | -6.25170500 | -0.22657600 | -1.19528000 |
| H | -6.68458300 | 1.35880700  | -0.58815700 |
| H | -7.39354100 | -0.36135200 | 1.04683200  |
| H | -5.74957000 | -1.01543500 | 1.13038600  |
| H | -6.08500200 | 0.60125000  | 1.76725200  |
| C | -3.78094100 | -4.39827800 | -0.72021400 |
| C | -4.10511000 | -4.39195300 | 0.78730500  |
| H | -3.67481800 | -5.43471500 | -1.06159900 |
| H | -4.63297900 | -3.98225400 | -1.27452100 |
| H | -5.02974400 | -4.94172400 | 0.99915500  |
| H | -3.29074500 | -4.85356900 | 1.35737300  |
| H | -4.22141900 | -3.36560400 | 1.15350900  |
| C | -0.77889000 | -5.52448200 | -1.19213000 |
| C | -0.14618800 | -5.87827200 | 0.16912000  |
| H | -0.04394000 | -5.69888000 | -1.98907700 |
| H | -1.61157900 | -6.20908900 | -1.39274000 |
| H | 0.22318200  | -6.91044400 | 0.18011800  |
| H | 0.69152800  | -5.20908200 | 0.39485600  |
| H | -0.88181900 | -5.76780700 | 0.97427700  |
| C | -2.35632400 | -1.62817700 | 3.85133400  |
| C | -3.02609600 | -0.82357600 | 2.88243400  |
| C | -2.49206400 | 0.39349600  | 2.45868300  |
| C | -1.29063500 | 0.87623100  | 2.96698800  |
| C | -0.60466900 | 0.13120100  | 4.07761800  |
| C | -1.19347100 | -1.20219400 | 4.41258500  |
| H | -3.01722500 | 0.97360800  | 1.70995400  |
| H | 0.46848200  | 0.02454500  | 3.85330200  |
| H | -0.62005700 | 0.77493900  | 4.98089200  |
| C | -0.81514700 | 2.26864600  | 2.68048500  |
| H | 0.27645900  | 2.33634700  | 2.69539600  |
| H | -1.16939500 | 2.62045800  | 1.71067700  |
| H | -1.19239700 | 2.95295900  | 3.45721100  |
| H | 4.05449100  | -1.96979300 | 3.01689900  |
| H | -3.95844900 | -1.17111400 | 2.45157300  |
| H | -0.66530200 | -1.81583400 | 5.13718500  |
| H | -2.77642300 | -2.59400600 | 4.11973600  |
